# Supplementary material for: Willingness to pay for health insurance in the informal sector of Sierra Leone
Source: PLoS One. 2018 May 16;13(5):e0189915. doi: 10.1371/journal.pone.0189915 (PMC5955490; doi:10.1371/journal.pone.0189915)
Supplement: S1 Dataset — Double Bounded Dichotomous Choice Design. (XLSX) [file pone.0189915.s016.xlsx]

## Sheet: NASSIT_WILLINGNESS_SURVEY.xls
NASSIT_ID	REGION	DISTRICT	SAQ100	SAQ101	SAQ102	SAQ103	SAQ104	SAQ104_B_SPECIFY	SAQ105	SAQ106_1_0_5_YRS_MALE	SAQ106_1__0__5_FEMALE	SAQ106_2__6__18_YRS_MALE	SAQ106_2__6_18_YRS_FEMALE	SAQ106_3__19__59_YRS_MALE	SAQ106_3__19__59_YRS_FEMALE	SAQ106_4__60__YRS_MALE	SAQ106_4__60__YRS_FEMALE	SAQ107_1_PREGNANT	SAQ107_2_LACTATING	SAQ108	SAQ109	SBQ200	SBQ201_1__COWS	SBQ201_2__SHEEP	SBQ201_3__GOAT	SBQ201_4__CHICKENS	SBQ201_5__BEEHIVES	SBQ201_6_OTHER	SBQ201_7_SPECIFY	SBQ202	SBQ202__SPECIFY	SBQ203	SBQ203_B_SPECIFY	SBQ204	SBQ205	SBQ206	SBQ207	SBQ207_B_SPECIFY	SBQ208_A	SBQ208_B	SBQ208_C	SBQ208_D	SBQ208_E	SCQ300	SCQ301	SCQ302	SCQ303	SCQ304	SCQ305
433	1	11
499	2	21
4109	3	31	1	2	1
10619	3	32	2	2	2															1	1
4109	4	42	1	2	1
3647	4	42	2	2	4
1465	4	42	1	5	1	1	1		6			2		1	1					2		650000		2								2		3		2			1	1	1	2	2	4	2	1	1	1	1
3584	4	42	2	1	4	5	1		6													650000
1243	4	42					8	STONE MINER														600000
1500	4	42	2	4	2	4	1		1			2	1	1	2		1			1	1	300000										1		3	2	2			1	1	2	2	2	3	2	1		2
11318	2	24	1	1	1	1	5		2	1		1		1	1					2		700000								4	PIT HOLE	1		1	2	2			1	1	1	2	1	3	2	2		2
1464	4	42	1	2	1	1	1		6		1	1			1				1	2		650000								2		2		2	2				1	1	2	2	2	2	1	2	1	1	1
1902	4	42	2	2	2	1	1		6	1				1	1					2		800000								2														3	2	1	1	1	1
861	4	42	1	3	1	3	1		6			1	2	1						2		150000								2		1		3	1	2			1	1	2	2	2	3	2	1	1	1	1
442	3	34	2	4	2	1	4		1			3		1	5	1	2			1	2	200000		1	2	4				2		1		4	1	2			1	1	1	1	2	2	2	1	2	1	1
515	2	23	1	2	1	1	1		2	1	1	2	1							1	2	350000			3	4				2														3	1	1	1	1	1
515	4	42	1	2	1	1	1		2	1	1	2	1							1	2	350000			3	4				2														3	1	1	1	1	1
3596	4	42	2	2	2	3	1		2	1	21		2		1	1	1	0	0	2		400000								2		1		4	2	2	4	ZINC	1	1	1	1	2	2	2	2		1
363	4	42	1	3	1	1	8	PHOTOGRAPHER	2					1						1	2	400000								2		1		2	1	2			1	1	1	2	1	5	2
338	2	21	2	1	4	1	2		6			1	5	1	1							400000								3		1		1	2	2			2	1	1	2	2	4	2	2
64	2	22	2	1	3	5	7		3	1	1	2	1	1						1	2	140000				1	5			3
64	4	42	2	1	3	5	7		3	1	1	2	1	1						1	2	160000								3
1487	4	42	2	1	2	1	1		1		1	2		11					1	2		200000								3		1		2	2	2			1	1	1	2	2	3	2	1	1	1	1
1451	4	42	1	2	1	1	1		6			1	2	1	1		1		2	2		400000								3				3	2	2			1	1	2	2	2	4	2	2
106	4	42	1	2	1	1	4		3	2										2		400000	1		3					3														2	1	1	1	2
243	2	25	1	2	1	4	1		6			3	2	1	1					2		500000	4							3		1		4	1	2			1	1	1	2	1	3	1	2		2
145	1	12	2	3	1	6	2		6	1			2	1	2		2			2		500000		2		4				3		1		4	2	2			1	1	1	2	2	3	2	2		1	1
378	2	21	1	3	1	1	2		6	1		1		1	1							500000				4				3		1		5	2	2			2	1	2	2	2	4	2	1	1	1	1
2217	4	42	2	3	1	6	2		6	1			2	1	2		2			2		500000				4				3		1		4	2	2			1	1	1	2	2	3	2	2		1	1
106	2	21	1	2	1	1	2		3	2										2		500000	1		3					3														2	1	1	1	2
10147	2	21	2	1	2	1	1		2									1		1	2	600000				10				3		2		6	1	1			1	1	1	2	2	3	1	1	1	1	1
61	2	22	2	1	2	1	1		3	1	1	1								2		700000								3		1		7	1	1			1	1	1	2	2	4	2	2		2
61	4	42	2	1	2	1	1		3	1	1	1								2		700000								3		1		7	1	1			1	1	1	2	2	4	2	2		2
3626	4	42	1	1	2	1	1		1							1	1	0	0	2		100000								3				2	2	2			1	1	2	2		2	2	2		2
10892	2	23	1	2	1	1	8	PHOTOGRAPHER	3			2	2	3	3	4	4		1	1	2	100000								3		1		4	1	2			1	1	1	2	1	3	2	2		2
1004	4	42	2	2	2	2	1		6			1	1		1					2		120000								3		1		1	2	2			1	1	1	2	2	2	2	2
17200	1	13	2	1	1	5	1		2			1	1	1	2			1		2		150000								3		1		2	1	2			1	1	1	2	2	3	2	1	1	1	1
17200	2	22	2	1	1	5	1		2			1	1	1	2			1		2		150000								3		1		2	1	2			1	1	1	2	2	3	2	1	1	1	1
1486	4	42	1	2	1	1	1		6		1	1	1	1	1			1		1	2	150000								3		1		2	2	2			1	1	1	2	2	5	1	1	1	1	1
1455	1	13	1	2	1	1	2		6	2				1	1				2	2		150000				3				3		1		1					2	1	1	2	2	4	2	2
1455	1	13	1	2	1	1	2		6	2				1	1				2	2		150000				3				3		1		1					2	1	1	2	2	4	2	2
10375	2	23	1	2	2	1	2		6	1	1	2	2	3	3			1	1	1	2	150000								3		1		4	1	2			1	1	1	2	1	3	2	1	2	1	1
768	4	42	1	3	1	1	4		5			1	1	1	1					2		150000								3		1		3	1	2			1	1	1	1	1	4	2	1	3	1	1
10320	2	24	1	3	1	6	6		6			2	3	1	2					2		150000				4				3		1		4	1	2			1	1	1	1	2	4	2	2		2
10895	2	23	1	1	1	1	8	PHOTOGRAPHER	2			2	2						2	1	2	150000								3		1		3	1	1			1	1	1	2	1	3	2	2		2
272	1	13	2		2	1	2		6	1	3	2	4	1	2			2	1	2		190000		3		6				3		1		4	1	2			1	1	1	2	2	4	2	1	1	1	1
4294	2	21	1	3	1		2														2	200000								3
488	4	41	2	3	1	1	1		6	0	0	2	1	1	3	0	0	0	1	2		200000								3														4	2	2		2
4030	1	12	1	1	1	5	7		4	2	1	1								2		200000				4				3		1		5	1	1			1	1	1	1	2	3	2	1	1	1	1
4294	4	42	1	1	3	5	7														2	200000								3
1494	4	42	1	3	1	1	8	STONE MINER	1		1	2			1				1	2		200000		1		3				3		1		3	1	2			1	1	1	2	2	3	2	1	2	1	1
996	4	42	2	4	1	5	2		6				1	3					1	2		240000								3		1		1	2	2			1	1	2	2	2	3	1	2		2
999	4	42	2	4	2	1	1		6			1		6	1					2		250000				10				3		1		1	1	1			2	1	1	2	2	4	2	1	1	1	1
2457	4	42	1	2	1	1	8	CARPENTER	5	1	1	2		3	3			1	2	1	2	250000								3														3	2	1	1	2
532	1	13	1	2	1	1	1		3		1		2	3	1				2	1	2	300000				4				3		1		2	2	2			1	1	1	2	2	2	1	2		1
403	2	21	2	2	4	4	1		6					1	2		1	0	0	2		300000				2				3														3	2	1	1	1	1
46	2	25	1	3	1	2	8	TYRE REPAIR	6	1	1	2		14					1	1	2	300000				4				3		3	ZINC	4	2	2	4	ZINC	1	1	2	2	2	4	2	2		2
10542	4	41	1	2	1	2	5		3					1	1			0	2	1	1	320000								3		3	ZINC	3	1	2			1	1	1	1	1	4	2	2		2
42	2	25	1	1	1	1	8	BARBER	3		1	1	1	1						1	2	350000								3		3	ZINC	4	1	1	4	ZINC	1	1	1	2	2	3	2	2		2
863	4	42	1	3	1	1	1		3			1	1	1								360000								3		1		1	2	2			1	1	1	2	2	4		2
1017	4	42	2	3	2	1	1		6					5	2					2		400000								3		1		4	2	2			1	1	1	2	2	3	2	1	1	1	1
346	2	22	1	2	1	1	4		6	1	1	1		1	1	1			1	1	1	400000				4				3		1		3	1	2			1	1	1	1	1	3	1	1	3	1	1
346	4	42		2	1	1	4		6	1	1	1		1	1	1			1	1	1	400000				4				3		1		3	1	2			1	1	1	1	1	3	1	1	3	1	1
289	1	13	2	1	2	1	2		6	2	3	1	4	3	4			1	1	1	1	420000				10				3		1		3	1	1			1	1	2	2	2	3	2	1	1	1	1
289	2	22	2	1	2	1	2		6	2	3	1	4	3	4			1	1	1	1	420000				10				3		1		3	1	1			1	1	2	2	2	3	2	1	1	1	1
526	4	42	1	1	4	1	5		3		1		1	2								450000								3														4	2	1	1	1	1
2092	4	42	1	1	4	1	5		3		1		1	2								450000								3														4	2	1	1	1	1
4337	1	11	1	2	2	5	8	BOAT OWNER	2	2	2	2	2							2		450000								3		1		3	2	2			1	1	1	2	2	2	2	2		2
471	4	41	2	2	1	1	1		6	1	1	0	0	1	1	0	0	0	2	1	1	480000					15			3		2		1										4	2	1	1	1	1
1236	4	42	1	1	1	5	1		2					1						2		480000								3		1		1	2	2	4	ZINC	1	1	1	2	2	3	2	1	1	1	1
1319	4	42	1	2	1	1	8	CARPENTER	2	1			2	1	1					2	1	480000								3		1		1	1	2	4	ZINC	1	1	1	2	2	2	2	1	2	1	1
3267	1	11	1	3	1	2	1		4	1	2	2								2		500000								3		1		4	1	1			1	1	1	1	2	2	2	2		2
2211	4	42	1	2	2	6	1		1		2							5		1	1	500000				4				3		1		1	2	2			1	1	1	2	2	1	2	2		2
169	3	33	1	2	1	2	4		1		1	2	4	2		1		0	0	1	1	500000				4				3		1		3	1	1			1	1	1	2	2	4	2	1	1	1	1
998	4	42	1	2	1	1	1		5	1					1					2		600000								3		1		1	2	2			2	1	1	2	2	4	2	1	1	1	1
1000	4	42	2	2	2	1	1		1				2	1	1					2		600000				7				3		1		2	2	2			1	1	2	2	2	3	1	1	1	1	1
389	3	34	1	2	1	5	5		3		2		1	2	1				1	2		600000			3	4				3		1		3	1	2			1	1	1	2	1	5	1	1	1	1	1
1094	2	21	1	2	1	2	6		1	1	2	2	2	1	2			1		2		600000			4					3		1		3	1	2			1	1	1	1	2	3	2	2		2
1318	4	42	1	2	1	5	8	CARPENTER	1			1		2						2		600000								3		1		2	2		4	ZINC	1	1	1	2	2	3	2	1	1	2
10572	4	42	1	4	1	1	1		6				2	1						2		650000				2				3		1		2	1	2			1	1	1	2	2	3	2	2		2
679	4	41	2	2	2	2	1		6				1	1	1				1	2		680000								3		1		7	1	1			1	1	1	2	2	3	2	2		2
1977	2	25	1	3	1	1	1		1		1	2								1	1	700000								3		1		2	2	2			1	1	1	2	2	2	1	1	3	1	1
84	2	25	1	4	1	2	2		6	3	3	5	3	1	4					2		700000		2	3	4				3		3	ZINC	7	1	1	4	ZINC	1	2	1	2	2	3	2	2
1016	1	12	2	3	2	1	1		6	1			2							1	2	750000			2					3		1		3	1	2			1	1	1	2	2	4	2	1	1	1	1
1325	4	42	1	2	1	6	8	CARPENTER	1			1		2			1			2		750000								3		1		2	1	2	4	ZINC	1	1	1	2	2	3	2	1	1	1	1
10417	2	23	1	2	1	6	5		4			2	2	1	1	1	1			1	2	800000								3		1		4	1	1			1	1	1	2	1	2	1	1	1	1	1
1681	4	41	1	3	1	1	3		1			2			3							1000000								3		2		1	2	2			1	1	1	2	2	2	2	2
10966	2	24	1	2	1	1	6		6		1	2		1	1		1		1		2	1000000				4				3		3	ZINC	4	1	1			1	1	1	1	2	3	2	2		2
274	1	13	1	1	2	5	3		3	2	1	4	5	6	2			1	2	1	2	480000	4	3	2					3		1		6	1	1			1	1	2	2	1	4	2	1	2	1	1
387	4	42	1	3	1	1	8	PHOTOGRAPHER	2					1						2		500000								3		1		2	2				1	1	1	2	2	4	1	2		2
1006	4	42	1	2	1	1	1		6		2									2		180000				2				3		1		2	2	2			1	1	1	2	2	3	2	1	1	1	1
543	2	25	1	3	1	5	4		4	0	0	1	2	1	1	0	0	0	0	2		100000								4	BUSH	2		2	2	2			1	1	1	2	2	4	2	2		2
11302	2	24	2	4	2	2	2		6	1	1	4	3	2	5	1	3	1	1	1	2	250000		1	2	8				4	PIT HOLE	2		4	1	1	1		2	1	1	2	2	3	2	1	1	2
1921	4	41	1	1	1	5	1		5					1								600000										1		1	2	2	1		2	2	1	2	2	2	2	2
1926	4	42	1	1	1	5	1		5					1								600000										1		1	2	2	1		2	2	1	2	2	2	2	2
11097	1	12	2	3	2	1	3		6			1	2						1	2		100000		5								2		4	2	2	1		1	2	2	2	2	3	1	1	2	1	1
11097	3	32	2	3	2	1	3		6			1	2						1	2		100000		5								2		4	2	2	1		1	2	2	2	2	3	1	1	2	1	1
11170	2	24	2	2	2	2	3		6			4	6	1	2					2		120000		2	2	12				4	PIT HOLE	1		4	1	1	1		1	1	1	2	2	3	2	2		2
11321	2	24	1	2	1	6	6		1					1						2		150000								4	PIT HOLE	1		1	2	2	1		1	1	1	1	2	4	2	2		2
10955	2	24	1	2	1	6	4		2					1						2		200000								4	PIT HOLE	1		1	2	2	1		1	1	1	2	1	3	2	2		2
20	3	34	1	2	1	1	5		5	1	4	1	4	1	1				1	1	1	150000								1		1		3	1	2	1		1	1	1	2	1	3	2	1	2	1	1
151	2	25	1	1	1	1	2		1	2	3	2	4	3	2	1	0	0	0	1	2	300000	1							1		3		5	1	1	1		1	1	1	2	1	1	2	2		1	1
3244	4	42	2	3	1	6	1		5		1	1	2		1			1		1	2	380000								1		1		2	2	2	1		1	1	1	2	2	4	2	2		2
177	2	25	1	1	1	1	2		1	1	0	1	4	2	2	0	0	0	0	1	1	400000	1	2	3					1		1		8	1	1	1		1	1	1	2	1	1	1	1	1	1	1
179	2	25	1	1	1	2	6		1	1	0	2	1	4	3	1	0	0	0	2		500000	1							1		2		5	1	1	1		1	1	1	2	2	1	2	1	4	1	1
87	2	23	1	3	1	2	4		3	1	3	3	3	3	5					2		100000					5			2		1		7	1	1	1		1	1	1	2	2	3	2	1	1	1	1
87	4	42	1	3	1	2	4		3	1	3	3	3	3	5					2		100000					5			2		1		7	1	1	1		1	1	1	2	2	3	2	1	1	1	1
114	4	42	1	1	1	1	7		4	3	1	1	1	2	6					2	2	100000		2	3	4				2		1		5	1	1	1		1	1	1	2	1	4	2	2		2
295	2	25	1	3	1	2	2		1	1	2	3	2	2	0	0	0	2	2	1	1	200000								2		3		3	2	2	1		1	1	2	2	2	2	2	1	1	1	1
3487	4	42	2	1	1	1	1		1	1				1					1	1	2	300000								2		3	ZINC	1	2	2	1		2	1	1	2	2	2	1	1	1	1	1
35	4	42	2	1	2	1	1		1										1	1	1	200000				1				2		2		1	1	1	1		2	2	2	1	2	1	2	2		2
10513	4	41	1	1	3	2	5		4	1									1	1	1	200000			2					2		3		3	1	1	1		1	1	1	2	1	1	1	1	2	1	1
240	2	25	1	2	3	2	1		3	2	0	1	2	1	2	0	0	1	3	1	2	300000	1	3	2					2		1		6	1	1	1		1	1	1	1	1	2	2	2		1	2
233	4	42	1	4	1	1	1		1			1		1	2					2		400000								2		3		3	1	2	1		1	1	1	2	1	4	2	2
42	4	42	1	3	1	1	6		2			2										400000								2		1		3	1	1	1		1	1	1	2	2	4	1	1	2	1	1
42	4	42	1	3	1	1	6		2			2										400000								2		1		3	1	1	1		1	1	1	2	2	4	1	1	2	1	1
319	4	42	1	2	1	1	4		1			1		1	1					2		450000								2		1		1	2	2	1		1	1	1	2	2	3	2	2		2
2073	4	42	1	2	1	1	4		1			1		1	1					2		450000								2		1		1	2	2	1		1	1	1	2	2	3	2	2		2
380	4	42	1	2	1	1	8	PHOTOGRAPHER	2	1		1								1	2	450000			3					2		1		3	1	1	1		1	1	1	2	2	5	1	1	1	1	1
3641	4	42	1	2	1	5	1		3	1	1		1	1	1		1			2		500000								2		3	HARD BOARD	1	2	2	1		1	1	1	2	2	3	2	2		2
3638	4	42	2	1	4	3	1		2		1	1	1	1	2	1		0	2	1	1	500000								2		2		4	1	1	1		1	1	1	1	2	2	2	2
505	1	11	1	2	1	2	2		3	1	1	0	1	2	0	0	0	2	1	2		500000								2		1		3	1	1	1		1	1	1	2	2	3	2	1	2	2
345	4	42	1	2	1	1	4		1			1		1	1							500000								2		1		1	2	2	1		1	1	1	2	2	3	2	2		2	2
2072	4	42	1	2	1	1	4		1			1		1	1							500000								2		1		1	2	2	1		1	1	1	2	2	3	2	2		2	2
875	4	42	1	3	1	1	2		2	1		2		2						2		600000								2		2		1	2	1	1		1	1	1	2	2	1	2	2		2
1702	4	41	1	3	1	1	5		2		1			3	3					2		600000				2				2		1		4	1	2	1		1	1	1	2	2	4	2	2
390	4	42	1	2	1	1	8	MUSICIAN	3		1		1					1				600000				4				2		1		2	1	1	1		1	1	1	1	1	5	2	2		2
3632	4	42	1	1	1	2	1		3		2									2		700000								2		1		2	2	1	1		1	1	1	2	2	2	1	2		1	1
924	4	42	1	2	1	5	8	SHOE MAKER	6					1						2		700000								2		1		1	2	2	1		1	1	2	2	2	4	1	2		2
384	4	42	1	2	1	1	3		1			1		1	1							750000								2		1		2	2	2	1		1	1	1	2	2	3	2	2		2	2
3608	4	42	1	3	4	3	1		4			1	1	1	1	1	1			2		800000								2		1		4	1		1		1	1	1	2	2	3	2	2		2
324	4	42	1	2	1	1	1		6	1			2	1	1				2	1	2	1000000								2		1		1	2	2	1		2	2	2	2	2	4	1	1	2	1	1
3630	4	42	1	1	1	1	8	SECURITY	3	2	1	1	2							2		280000								2		1		3	1		1		1	1	1	2	2	3	2	2		2
365	4	42	1	3	1	1	2		3		1	1			1					2		500000				3				2		1		3	1	2	1		1	1	1	2	2	3	2	2		2
3085	1	13	1	4	1	2	1		3	1	1	1	1	2					1	1	2	650000	8	12	13					2		1		10	1	1	1		1	1	1	1	1	4	2	1	1	1	1
3085	4	42	1	4	1	2	1		3	1	1	1	1	2					1	1	2	600000	8	12	13					2		1		10	1	1	1		1	1	1	1	1	4	2	1	1	1	1
306	4	42	1	1	1	1	8	VEHICLE PARKING	6			1	1	1	1					2		480000								2		1			2	2	1		1	2	2	2	2	4	2	2		2	2
10409	2	23	1	2	1	6	1		3	1		1	2	1	1			1		1	1	180000				4				2		1		5	1	1	1		1	1	1	2	1	2	1	1	2	1	1
2772	4	42	1	2	1	6	1		2	1	1									2		200000								2		1		1	2	2	1		1	1	1	2	2	3	2	1	2	1	1
1589	4	41	1	3	1	1	5		4				2	1					1	1	1	480000			1	3				3		3	ZINC	3	1		1		1	1	1	2		1	1	1		1	1
495	2	25	1	1	3	5	7		3			3	3	1	2					2		170000								3		1		4	2	2	1		1	1	1	2	2	4	2	2		2
10578	3	32	1	1	1	5	7		3					1						2		150000				4		6	DOG 1	3		1		1	2	2	1		1	1	1	2	2	3	2	2		2
522	2	25	2	3	1	2	2		2			1		1					1	1	1	500000								3		2		2	1	2	1		1	1	1			2	2	2		2
1102	1	12	1	5	1	1	8	C/D POLICE	6			4	4	2	1					1	1	100000				24				3		1		1	2	1	1		1	1	1	2	2	5	2	2		2
43	1	13	1	5	1	1	8	C/D POLICE	6			4	4	2	1					1	1	100000				24				3		1		1	2	1	1		1	1	1	2	2	5	2	2		2
954	3	31	2	4	1	4	1		6	1	1	2								1	2	200000			3	4				3		2		2	1	2	1		2	1	2	2	2	2	2	1	2	1	2
1519	4	42	1	4	1	1	1		1	1	2	2	2	2	3			1	2	2		200000								3		2		2	2	2	1		1	1	1	2	2	3	2	1	1	1	2
954	4	42	2	4	1	4	1		6	1	1	2								1	2	200000			3	4				3		2		2	1	2	1		2	1	2	2	2	2	2	1	2	1	2
102	2	21	1	2	1	1	2		3	1	2									2		200000								3		1		1	2	2	1		1	1	1	1	2	4	2	2		2
102	4	42	1	2	1	1	5		3	1	2									2		200000								3		1		1	2	2	1		1	1	1	1	2	4	2	2		2
2025	4	42	1	2	1	1	1		6	1	1	1	1							2		300000				4				3		3	TARPOLIN	2	2	2	1		2	2	1	1	1	1	2	1	2	1	1
546	2	25	2	3	1	1	2		6	0	0	1	3	1	1	0	0	0	0	2		300000								3		1		2	1	1	1		1	1	1	2	2	3	2	2		2
194	2	25	1	2	1	2	2		6	1	1	2	3	3	2			2	1	1	1	300000		2	3	4				3		1		9	1	1	1		1	1	1	2	2	1	1	1	3	1	1
3317	1	11	2	4	1	2	1		6	1	2									1	1	400000			3					3		1		4	1	1	1		1	1	1	1	2	1	1	1	1	1	2
33	1	12	2	2	1	3	1		6	1	3		1	2	1	1				2		400000			5					3		1		4	1	2	1		1	1	1	1	2	3	2	1	1	1	1
3460	4	42	1	2	1	1	1		2	1	1	1	1						1	1	2	400000					6			3		3		1	1	1	1		1	1	1	1	1	3	1	1	1	1	1
1134	4	42	1	2	1	1	1		1	1		2		3	1	1				1	1	400000			3					3		2		3	1	2	1		1	1	1	2	2	3	2	1	1	1	1
33	4	42	2	2	1	3	1		6	1	3		1	2	1	1				2		400000			5					3		1		4	1	2	1		1	1	1	1	2	3	2	1	1	1	1
2028	4	42	2	2	1	4	1		6		1	2	3							1	2	400000			3	4				3		3		3	2	2	1		2	1	1	2	2	2	2	1	1	1	1
36	1	12	1	2	1	1	2		1	1		2		3	1	1				1	1	400000			3					3		2		3	1	2	1		1	1	1	2	2	3	2	1	1	1	1
10621	3	32	1	3	1	2	2		1		1	3	1	1	1					1	1	431000				4		6	DUCKS 8	3		1		3	2	2	1		1	1	1	2	2	4	2	2		2
11154	1	12	1	2	1	1	2		6		2		3	1						2		450000								3		1		4	1	2	1		1	1	1	2	2	4	2	1	2	1	1
5330	1	11	1	2	2	1	1		5	1	1	2	1	1						2		500000			3	4				3		1		6	1	1	1		1	1	1	2	2	1	2	2		2
209	4	42	1	4	1	1	1		6				2	2						2		500000								3		3	ZINC	1	1	2	1		1	1	1	2	2	3	1	1	1	1	1
220	4	42	1	2	1	1	1		3	1		1			1			1		2		500000				1				3		3	ZINC	1	1	2	1		1	2	1	2	2	2	2	2
3479	4	42	2	1	2	1	1		1	1		1	1	1	1				1	1	2	500000				3				3		3	ZINC	2	2	2	1		1	1	1	2	2	4	2	2
808	4	41	1	3	1	1	4		2		2	1		1	1					1	2	500000								3		2		1	1	1	1		1	1	2	2	2	4	2	1	1	1	1
1104	4	41	1	5	1	1	5		2			3	1	0	1	0	0	1	1	1	2	550000			3					3		2		2	2	1	1		1	2	2	2	2	4	2	1	1	1	1
171	1	13	1	1	1	1	1		3											2		600000			3	4				3		1		2	1	2	1		1	1	1	2	2	2	2	2		2
10115	2	21	1	1	2	1	1		4	1								2	3	1	2	600000								3		2		5	1	2	1		1	1	1	2	2	4	1	1	1	1	1
13900	3	33	1	2	1	1	2		2	1	2	3	1	1	4	0	0	0	0	1	2	600000	0	0	6	12				3		1		3	1	1	1		1	1	1	2	2	4	1	1	2	1	1
155	1	13	1	1	1	1	4		6											2		600000				4				3		1		1	2	2	1		1	1	1	2	2	2	2	2		2
11155	1	12	1	4	1	2	2		6	1	1	2	3	1					2	2		700000								3		2		2	2	2	1		1	1	1	2	2	2	1	1	3	1	1
11144	1	12	1	3	1	2	2		6			4		1						2		700000								3		2		4	2	2	1		1	1	2	2	2	3	2	1	2	1	1
2226	4	42	2	1	1	5	1		1	1	0	0	0							1	1	800000								3		1		3	1	1	1		1	1	1	2	2	1	2	2		2
773	4	42	1	1	1	2	1		3	2		1		1		2	1		1	1	1	800000		2	3	4				3		1		2	1	1	1		1	1	1	2	1	4	1	1	1	1	1
315	1	11	1	3	1	1	2		2	0	0	2	0	1	2	0	0	0	0	2		800000		2	2					3		2		3	1	1	1		1	1	2	2	2	2	2	1	2	1	1
297	2	25	1	2	1	5	4		2	0	0	2	1	1	0	0	0	0	0	2		800000								3		2		2	2	2	1		1	1	1	2	2	3	2	1	1	1	1
398	2	25	1	2	1	1	5		2	1	0	2	4	2				0	1	1	2	800000								3				2	1	1	1		1	1	1	1	1	1	1	1	2	1	1
3110	4	42	2	3	1	1	6		2		2		1	1	1				2	1	1	800000								3		3	ZINC	6	1	1	1		1	1	1	2	2	2	2	1	2	1	1
773	2	21	1	1	1	2	2		3	2		1		1		2	1		1	1	1	800000		2	3	4				3		1		2	1	1	1		1	1	1	2	1	4	1	1	1	1	1
11090	1	12	2	2	2	1	1		3			2								1	2	850000								3		2		4	2	2	1		1	1	1	2	2	3	2	1	1	1	1
11090	3	32	2	2	2	1	1		3			2								1	2	900000				2				3		2		4	2	2	1		1	1	1	2	2	3	2	1	1	1	1
10301	4	42	1	2	2	1	5		3	0		1	1								1	950000								3		1		4	1	1	1		1	1	1	2	1	4	2	2		1	1
167	1	13	1	3	1	1	1		6			1	3	2						2		100000								3		1		2	1	2	1		1	1	1	2	2	3	2	2		2
1041	3	31	2	3	1	4	1		6		2	1	1							1	2	100000			3	4				3		3		2	2	2	1		2	1	1	1	1	2	2	1	1	1	1
94	3	34	1	2	1	1	1		1			2	2	1	1			0	0	2		100000				5				3		2		3	1	1	1		1	1	1	2	2	3	1	1	2	1	1
3459	4	42	1	2	1	1	1		3	1			1									100000			3					3		3	ZINC	1	2	1	1		1	1	1	2	2	2	2	2		2
1041	4	42	2	3	1	4	1		6		2	1	1							1	2	100000			3	4				3		3		2	2	2	1		2	1	1	1	1	2	2	1	1	1	1
11104	1	12	1	3	1	1	2		1		1	2							1	1	2	100000		3	7	11				3		1		4	2	1	1		1	1	1	2	2	3	1	1	2	1	1
11192	1	12	1	4	1	2	2		6			3	1							2		100000								3		2		4	2	2	1		1	1	1	2	2	3	2	1	3	1	1
435	2	25	2	1	3	5	2		2										1	1	2	100000			2					3		1		6	2	1	1		1	1	1	2	2	3	2	2		2
11104	3	31	1	3	1	1	2		1		1	2							1	1	2	100000		3	7	11				3		1		4	2	1	1		1	1	1	2	2	3	1	1	2	1	1
1100	4	41	2	1	2	1	2		6		1								2	1	2	100000			2					3		1		3	1	1	1		1	1	1	2	2	3	2	1	2	1	1
11150	1	12	2	2	3	1	3		6	2	1	1								2		100000			3	7				3		2		4	2	1	1		1	1	1	2	2	3	1	1	2	1	1
3447	4	42	1	2	1	1	4		1	0	1	1	1	0	0	0	0	0	0	1	2	100000				4				3		1		1	1	2	1		1	1	1	2	2	3	2	2		2
770	4	42	1	3	1	4	4		1			1	2	1						2		100000								3		1		2	1	1	1		1	1	1	2	2	3	2	1	2	1	1
220	1	11	1	1	1	1	6		3	2				1	1				2	1	1	100000								3		1		1	1	2	1			1		2	2	3	1	1	2	2	1
447	3	34	1	3	1	2	2		6	1		1	2	1	2				7	1	2	130000			1	3				3		1		3	1	2	1		1	1	1	2	2	4	2	1	2	1	1
11095	1	12	2	2	2	1	1		6	1			1							1	2	150000				3				3		2		2	1	2	1		1	1	2	2	2	3	2	1	1	1	1
10119	2	21	1	1	1	1	1		6		1	1						1	2	2		150000								3		2		1	2	2	1		2	1	1	2	2	3	2	2		2
263	2	24	2	4	2	1	1		6	0	0	3		2	1	0	0	0	0	2		150000		2	1	5				3		1		2	2	1	1		1	1	2	2	2	2	2	2		1	1
8749	3	31	2	4	1	1	1		6	1	1	2	2	1						2		150000		2	3	4				3		1		3	1	1	1		1	1	1	2	2	1	2			1	1
1447	4	42	2	2	3	1	1		1	2	1	1	1	1	1		1		1	2		150000								3		2		2	2	2	1		1	1	1	1	2	3	2	1	2	1	1
8749	4	42	2	4	1	1	1		6	1	1	2	2	1						2		150000		2	3	4				3		1		3	1	1	1		1	1	1	2	2	1	2			1	1
140	2	25	1	3	1	6	2		6					1						2		150000		2	3	4				3		1		4		1	1		1	1	2	2	2	4	2	2		2
1037	3	31	1	2	1	1	2		6	1	1	2								2		150000				4				3		2		2	1	2	1		2	1	2	2	2	1	2	1	2	1	1
1044	3	31	2	4	1	4	2		6	1	2	1	1							2		150000		2		4				3		2		2	1	2	1		2	1	1	2	2	2	2	1	1	1	1
10313	4	42	1	3	1	1	2		6				1							2		150000								3		2		2	1	2	1		1	1	2	2	2	4	2	1	1	1	1
3474	4	42	1	2	1	1	3		1		1								2	2		150000				4				3		1		1	2	2	1		1	1	1	2	2	4	2	2		2
166	1	11	1	1	1	1	5		1			1								1	2	150000				4				3		1		1	1	1	1		1	1	1	2	1	4	2	1	1	1	1
3452	4	42	1	3	1	1	5		3			1	1	2						1	2	150000								3		1		2	1	1	1		1	1	1	2	2	4	2	2		2
16	1	11	2	1	1	4	6		6	0	0	1	2	2	2	0	0			2		150000								3	.	1		3	1	1	1		1	1	1	2	2	4	2	2		2
2463	4	42	1	2	1	1	8	CARPENTER	1	1		2								2		150000								3		1		2	2	2	1		1	1	1	2	2	3	2	2		2
11108	1	12	2	2	2	1	1		2		1	2						1		1	2	160000								3		2		3	1	2	1		2	1	1	2	2	3	2	1	1	1	1
11108	1	13	2	2	2	1	1		2		1	2						1		1	2	160000								3		2		3	1	2	1		2	1	1	2	2	3	2	1	1	1	1
441	4	42	2	2	2	1	1		1	1		1	2	1	1				1	1	1	160000				11				3		1		2	1	1	1		1	1	1	2	2	2	2	1	1	1	1
288	1	13	1	3	1	2	2		6	2		3	4	5	3	1	1	3	2	1	2	169000		3	2					3		1		4	1	1	1		1	1	1	2	2	1	2	1	3	1	1
288	2	22	1	3	1	2	2		6	2		3	4	5	3	1	1	3	2	1	2	169000		3	2					3		1		4	1	1	1		1	1	1	2	2	1	2	1	3	1	1
278	1	13	2	1	3	5	2		6	4	2	3	4	3	2	1	2	2	3	1	1	180000								3		1		4	1	1	1		1	1	2	2	2	3	2	1	2	1	1
198	2	25	1	2	1	1	1		6	2	0	3	2	1	1	0	0	0	0	2		200000			3	4				3		1		3	2	1	1		1	1	1	2	1	3	2	2		2
2147	4	41	1	3	1	1	1		2			1	2	1						2		200000				4				3		1		2	1	2	1		1	1	1	2	2	2	1	1	2	1	1
9075	4	41	1	4	1	6	1		3				1	2	1					2		200000								3		1		1	2	2	1		1	1	1	2	2	1	1	1	1	1	1
228	4	42	1	3	1	5	1		1			1								2		200000								3		3		1	2	2	1		1	2	1	2	2	3	2	2
229	4	42	1	3	1	5	1		1				2							2		200000								3		3		2	1	2	1		1	1	1	2	2	4	2	2
11095	4	42	2	2	2	1	1		6	1			1							1	2	200000			2	3				3		2		2	1	2	1		1	1	2	2	2	3	2	1	1	1	1
1485	4	42	2	5	1	2	1		6	0	0	3	2	3	3	1	1	0	0	2		200000								3		3		4	1	1	1		1	1	1	2	2	4	2	1	1	1	1
3583	4	42	2	1	4	5	1		6	1		1		2	3	1	1			2		200000								3		1		2	1	2	1		2	1	1	2	2	2	2	2		2
3583	4	42	2	1	4	5	1		6	1		1		2	3	1	1			2		200000								3		1		2	1	2	1			1	1			2	2	2		2
2023	3	31	2	2	2	1	2		6		1	2	1	1	1					2		200000			3	4				3		2		2	2	2	1		1	1	2	2	2	1	1	1	2	1	1
1232	4	41	1	4	1	2	2		2	1	1	1	2	1	1					2		200000				3				3		1		1	1	1	1		1	1	2	2	2	3	2	1	1	1	1
81	4	42	2	1	2	1	2		6		1	1	1	2	1					1	1	200000				7				3		1		4	1	2	1		1	1	1	2	2	4	2	1	1	2
11150	1	13	3	2	3	1	3		6	2	1	1								2		200000			3	7				3		2		4	2	1	1		1	1	1	2	2	3	1	1	2	1	1
1297	4	41	1	2	1	1	3		6		1	2	1	3	1					1	2	200000								3		1		3	2	2	1		1	1	1	2	2	4	2	1	2	1	1
553	2	25	1	1	3	5	4		6	0	0	0	1	1	2	0	0	0	0	2		200000				4				3		1		3	1	2	1		1	1	1	2	2	3	2	2
745	4	41	1	4	1	5	4		2			1	1	0	0	0	0	0	0	2		200000								3		1		2	1	1	1		1	1	1	2	2	2	2	1	1	1	1
11110	1	12	1	2	1	1	5		3		1								1	1	2	200000								3		2		2	2	2	1		1	1	2	2	1	3	2	1	1	1	1
2021	4	42	1	1	3	5	5		2	1	3	2	1							1	2	200000				4				3		1		3	2	2	1		1	1	1	2	2	2	2	1	1	1	1
42	1	11	1	1	1	1	2		1	0	0	2	1	1	1	0	0	0	0	1	1	200000								3		1		3	2	1	1		1	1	1	2	2	4	2	1	1	1	1
1035	3	31	1	2	1	1	8	CARPENTER	6	1	2		3							1	2	200000				4				3		2		3	1	2	1		2	1	1	2	2	1	2	1	2	1	1
30	1	13	1	4	1	6	8	MINING	3				1	2	1					2		200000								3		1		1	2	2	1		1	1	1	2	2	1	1	1	1	1	1
308	4	42	1	2	1	1	8	OMOLANKAY RIDER	6	1	2	3	2	2	3			1	1	1	1	200000								3		1		2	2	2	1		2	1	2	2	2	2	2	1	2	1	1
318	4	42	1	2	1	2	8	OMOLANKAY RIDER	6			1	1	1	1					2		200000								3		1			2	2	1		2	1	1	2	2	1	1	1	1	1	1
2208	4	42	1	2	1	1	8	OMOLANKAY RIDER	6	1	2	3	2	2	3			1	1	1	1	200000								3		1		2	2	2	1		2	1	2	2	2	2	2	1	2	1	1
234	4	42	1	4	1	1	1		1				1	4	1					2		208000								3		3		3	1	2	1		1	1	1	2	1	3	2	2
1	1	11	2	2	2	1	1		6	0	1	1	2	2	0	0	0			1	2	250000			2	6				3		1		4	1	2	1		1	1	1	2	2	5	2	2		2
5334	1	11	2	2	2	1	1		1	1	2	1	2					1		1	1	250000			3					3		1		3	1	1	1		1	1	1	2	2	4	1	1	1	1	1
15200	1	13	2	3	2	2	1		5			2	2	3					2	2		250000				4				3		1		4	1	2	1		1	1	1	2	2	3	2	2		2
15200	2	22	2	3	2	2	1		5			2	2	3					2	2		250000				4				3		1		4	1	2	1		1	1	1	2	2	3	2	2		2
30066	4	42	1	3	1	1	1		1		1	2	1	1						2		250000				4				3		2		3	1	2	1		2	1	2	2	2	1	1	1	1	1	1
11107	1	12	1	4	1	2	2		6			2	2	3				1	1	1	2	250000		7						3		2		5	1	1	1		1	1	1	2	2	3	1	1	4	1	1
11107	1	13	1	4	1	2	2		6			2	2	3				1	1	1	2	250000		7		2				3		2		5	1	1	1		1	1	1	2	2	3	1	1	4	1	1
1082	2	21	1	2	1	1	2		2	2			3		1				1	1	2	250000	0	1	1					3		1		12	2	2	1		1	1	1	2	2	3	2	1	1	1	1
30066	3	31	1	3	1	1	2		1		1	2	1	1						2		250000				4				3		2		3	1	2	1		2	1	2	2	2	1	1	1	1	1	1
11	4	42	1	1	2	5	6		2				2									250000			2					3		1		2	1	2	1		1	1	1	2	2	1	1		1	1	1
11	4	42	1	1	2	5	6		2				2									250000			2					3		1		2	1	2	1		1	1	1	2	2	1	1		1	1	1
128	2	21	1	2	1	1	2		2				4	3	2				2	2		280000				4				3		1		6	1	1	1		1	1	1	2	1	3	2	1	2	1	1
10721	2	25	1	3	1	2	1		5	0	0	1	1	4	4	0	0	2	2	2		300000			3					3		2		5	1	1	1		1	1	1	2	2	3	2	1	1	1	1
1165	4	42	1	2	2	1	1		2	1								1		2		300000								3		1		2	2	2	1		1	1	1	2	2	3	2	2		1	1
2023	4	42	2	2	2	1	1		6		1	2	1	1	1					2		300000								3		2		2	2	2	1		1	1	2	2	2	1	1	1	2	1	1
66	4	42	1	2	1	2	1		2			1	1		3					2		300000				15				3		1		1	2	2	1		1	1	1	2	2	4	2	2		2
125	4	42	1	1	1	5	1		2				1					1		1		300000								3		1		1	1	1	1		1	1	1	1	1	4	2	2
51	4	42	1	2	1	2	1		2			1	1		1					2		300000				15				3		1		1	2	2	1		1	1	1	2	2	4	2	2		2	2
12163	2	24	1	2	1	1	2		6			5	3	2	1		1	0	0	2		300000		5	8	5				3		1		6	1	1	1		1	1	1	2	2	2	2	1	1	1	1
12163	3	33	1	2	1	1	2		6			5	3	2	1		1	0	0	2		300000		5	8	5				3		1		6	1	1	1		1	1	1	2	2	2	2	1	1	1	1
3449	4	42	1	3	1	1	3		1	1	0	1	1	1	0	0	0	0	0	1	2	300000						6	PIGS 4	3		1		2	1	1	1		1	1	1	2	2	4	2	2		2
3470	4	42	1	2	1	1	3		2		1									2		300000						6	PIGS 5	3		1		2	1	2	1		1	1	1	2	2	4	2	2		2
757	4	41	1	2	1	1	4		2	1	0	2	0	1	1	0	0	0	1	2		300000								3		1		2	1	2	1		1	1	1	2	2	4	2	1	2	1	1
10601	4	42	1	2	1	1	4		2	2	0	0	0	1	0	0	0	0	0	2		300000		2						3		1		3	1	1	1		1	1	1	2	2	3	1	1	2	1	1
11110	1	13	1	2	1	1	5		3		1								1	1	2	300000								3		2		2	2	2	1		1	1	2	2	1	3	2	1	1	1	1
2021	3	31	1	1	3	5	5		2	1	3	2	1							1	2	300000				4				3		1		3	2	2	1		1	1	1	2	2	2	2	1	1	1	1
30	4	42	1	2	1	1	6		6			2			1							300000								3		1		2	2	2	1		1	1	1	2	2	4
32	4	42	1	2	1	1	6		2			1			1							300000				8				3		1		2	1	2	1		1	1	1	2	2	4	2
125	4	42	1	1	1	5	6		2				1					1		1		300000	3	10		24				3		1			1	1	1		1	1	1	1	1	4	2	2
30	4	42	1	2	1	1	6		6			2			1							300000								3		1		2	2	2	1		1	1	1	2	2	4
32	4	42	1	2	1	1	6		2			1			1							300000				8				3		1		2	1	2	1		1	1	1	2	2	4	2
445	3	34	1	1	1	5	7		3				1	4	3	1				1	2	300000				10				3		1		4	1	1	1		1	1	1	2	2	4	2	1	1	2
51	4	42	1	2	1	2	8	CARPENTER	2			1	1		1					2		300000				15				3		1		1	2	2	1		1	1	1	2	2	4	2	2		2	2
66	4	42	1	2	1	2	8	CARPENTER	2			1	1		3					2		300000				15				3		1		1	2	2	1		1	1	1	2	2	4	2	2		2
1035	4	42	1	2	1	1	8	CARPENTER	6	1	2		3							1	2	300000				4				3		2		3	1	2	1		2	1	1	2	2	1	2	1	2	1	1
1403	4	41	1	3	1	1	8	MASON	6			3		1	1					2		300000								3		1		3	1	2	1		1	1	1	2	2	3	1	1	2	1	1
2207	4	42	1	1	1	5	8	WELDER	5					1						2		300000								3		1		6	1	1	1		1	1	1	2	2	4	2	2		1	1
318	1	13	2	3	1	1	2		1	2	2	1	1	1				1	2	1	1	310000				4				3		1		7	2	1	1		1	1	2	2	1	1	1	1	4	1	1
1957	4	42	1	3	1	1	1		2	1	0	2		2	1	0	1	2	1	1	1	350000				4				3		2		2	1	1	1		1	1	1	2	2	3	1	1	6	1	2
1980	1	11	2	2	2	1	1		1		1	2	1							2		380000				4				3				2	1	2	1		1	1	2	2	2	3	1	1	2	1	2
14001	4	42	1	2	2	1	1		2			1	1	1	1					2		400000								3		1		2	1		1		1	1	1	2	1	3	2	1	2	1	1
3023	4	42	1	4	1	2	1		2	1		2	1	2						1	1	400000								3		3		2	1	1	1		1	1	1	2	2	3	2	2		1	1
3617	4	42	1	2	4	6	1		1		2	1	1	1	1	2	1	1		2		400000								3		1		5	1	2	1		1	1	1			3	2	1	2	1	1
206	2	24	1	1	1	2	6		1	1	0	3	1	4	2	1	0	1	1	2		400000	2		2					3		1		3	1	1	1		1	1	1	2	1	1	1	1	11	1	1
2016	4	42	1	1	3	5	7		3	0	0	1	0	4	2	0	0	0	0	2		400000				4				3		1		3	1	1	1		1	1	1	2	2	3	1	2		2
62	2	24	1	3	1	2	1		1	0	0	3	4	3	2	0	0	0	0	2		450000		3	4	7				3		1		5	1		1		1	1	1	2	1	3	1	1	3	1	1
10310	4	42	2	5	2	4	1		6		1	2		1						2		450000						6	DUCKS 4	3		1		4	1	1	1		2	1	1	2	2	3	2	2		1	1
1219	4	41	1	2	1	2	1		6	1	1	1	2	2	1				1	1	2	500000		1	3					3		1		2	1	2	1		1	1	1	2	1	3	2	1	2	1	1
9074	4	41	1	4	1	1	1		5			5	2	1	1					1	1	500000				2				3		1		5	1	1	1		2	1	1	2	2	5	2	1	1	1	1
3595	4	42	2	3	2	4	1		1			1	2	2	3	1	1	0	2	1	2	500000								3		1		3	1	2	1		1	1	1	1	2	2	2	1	2	2
306	1	11	1	2	1	2	2		6	0	0	0	3	1	0	0	0	1	1	1	1	500000			3					3		2		6	1	1	1		1	1	1	1	2	4	2	2		1	1
29	1	13	1	4	1	1	2		5			5	2	1	1					1	1	500000				2				3		1		5	1	1	1		2	1	1	2	2	5	2	1	1	1	1
2028	3	31	2	2	1	4	2		6		1	2	3							1	2	500000			3	4				3		3		3	2	2	1		2	1	1	2	2	2	2	1	1	1	1
1056	4	42	2	1	2	1	1		1		1	2								2		600000								3		1		3	1	2	1		1	1	1	2	1	4	2	1	2	1	1
974	4	42	2	3	2	1	1		1			3	1	0	2	0	0	0	2	2		600000				4				3		1		5	2	1	1		2	1	1	1	2	4	1	1	2	2
1044	4	42	2	4	1	4	1		6	1	2	1	1							2		600000				4				3		2		2	1	2	1		2	1	1	2	2	2	2	1	1	1	1
3644	4	42	1	1	1	3	1		4			2	2	1	1			1		2		600000								3		1		2	2	2	1		1	1	1	2	1	2	2			2
98	3	34	1	1	1	5	5		2			12			1	2		0	0	2		600000								3		2		3	2	2	1		2	1	1	2	1	2	1	1	1	1	1
1037	4	42	1	2	1	1	1		6	1	1	2								2		650000				4				3		2		2	1	2	1		2	1	2	2	2	1	2	1	2	1	1
27	2	25	1	2	1	2	1		3			1		1	1					1	2	700000								3		1		8	1	2	1		1	1	1	2	2	4	2	2		2
35	2	25	1	1	1	2	5		6	1	1		1	2	1			1	2	1	1	700000		2		2				3		1		3	1	1	1		1	1	1	2	1	4	2	2		2
346	2	23	2	4	1	1	2		4	0	3	2	1	3	2	0	0	0	1	1	1	720000	4	2		8				3		1		5	1	2	1		1	1	1	2	2	2	2	1	2	1	1
2025	3	31	1	2	1	1	1		6	1	1	1	1							2		800000				4				3		3	TARPAULIN	2	2	2	1		2	2	1	1	1	1	2	1	2	1	1
31	3	33	1	2	1	2	1		6	1	1	2	1	1	2	1			1	1	1	800000				4				3		1		4	1	1	1		1	1	1	2	2	1	2	1	3	1	1
2313	4	42	1	2	1	1	4		2			1		1	1					2		800000								3		1		1	2	2	1		1	1	2	2	2	3	1	1	1	1	1
1010	4	42	1	2	1	1	1		3	1	2									1	2	900000			2					3		1		1	1	2	1		1	1	1	2	2	3	2	2
163	3	33	1	2	1	1	5		2			2		2	2			1	0	1	2	280000				99				3		1		3	1		1		1	1	1	2	1	4	2	2		2
3041	4	42	1	3	1	1	8	WELDER	3			1	1	2	1	1				2		650000								3		3		3	1	1	1		1	1	1	2	2	3	2	1	2	1	1
3446	4	42	1	3	1	1	5		2	0	1	1	0	0	0	0	0	0	2	1	2	400000				4				3		1		1	1	1	1		1	1	1	2	1	4	2	2		2
1194	4	42	2	4	2	1	1		2			1			2			1	1	1	1	520000								3		1		2	2	2	1		1	1	1	2	1	1	1	1		1	1
2234	4	42	1	2	1	1	1		5			6			1					1	1	500000								3		1		5	1	1	1		1	1	1	2	2	1	2	2		2
2010	4	42	2	2	2	1	1		6	0	0	0	3	4	3	0	0	0	0	1	1	180000				4				3		1		4	1	2	1		1	1	2	1	1	3	1	1	0	1	1
69	2	25	1	2	1	1	6		2		1	1		2	3					2		180000				4				3		1		4	1	1	1		1	1	1	1	2	3	2	1	2	1	1
314	2	23	1	2	1	2	6		2	1	2	1	0	1	1	0	0	1	1	2		300000								3		1		3	2	2	1		1	1	1	2	1	3	2	1	1	1	1
2225	4	42	1	1	1	1	1		4		0	1		2	0	0	0	0	1	1	1	700000								3		2		6	1	1	1		1	1	1	2	1	1	2	2		2
274	2	25	2	2	1	4	2		6	0	0	5	2	0	1	0	0	0	0	2		400000				4				4	BUSH	3		4	1	2	1		2	1	2	2	2	1	2	1	3	1	1
1991	4	42	1	1	1	5	8	STONE MINER	6	0	0	0	0	1	0	0	0	2	2	2		550000								4	RIVER	1		2	2	1	1		1	1	2	2	2	3	1	2		2
280	2	25	2	3	3	4	1		6	0	0	3	1	2	1	0	0	0	0	2		760000								4	PUBLIC TOILET	3	ZINC	1	1	2	1		2	1	1	2	2	2	2	1	3	1	1
10521	4	41	1	2	1	1	5		4			1						1			1	200000			4					4	SEA	2		4	1	2	1		1	1	1	2	1	4	1	1	1	1	1
251	4	42	1	2	1	1	3		5	2	1	1		1	1			1		2		250000				8				4	PUBLIC TOILET	1		3	1	1	1		1	1	1	2	2	5	1	1	1	1	1
159	2	25	1	1	1	2	2		1	1	0	3	4	2	3	1	0	0	0	1	2	300000	4	0	0	0	0			4	SEA	3		1	1	1	1		1	1	1	1	2	1	2	2		1	1
252	4	42	1	1	1	2	2		1	1	1		2	1	1				1	1	1	450000				3				4	PUBLIC TOILET	1		3	1	1	1		1	1	1	2	2	5	1	1	1	1	1
2228	4	42	1	3	1	1	1		5	0	0	1	0	1	0	0	0	0		1	1	200000				4				4	SEA	2		3	1	1	1		1	1	1	2	1	1	2	2		2
11157	2	24	1	5	1	2	8	RETIRED	1	1	1	4	5	1	3				1	1	2	0			2	14				4	PIT HOLE	1		6	1	1	2		1	1	1	1	2	3	2	2		2
11305	2	24	1	5	1	2	1		6	1	2	4	6	4	5	1	2		1	1	2	650000		2	3	20				4	PIT HOLE	1		8	1	1	2		1	1	1	1	1	3	2	2		2
11286	2	24	2	4	1	4	1		1	1		1	2	2	3				1	1	2	650000		2	1	12				4	PIT HOLE	1		3	1	1	2		1	1	1	2	2	3	2	2		2
11284	2	24	2	5	2	2	1		6	1	1	2	4	1	2		1	1	1	1	2	650000		1	1	5				4	PIT HOLE	1			1	1	2		1	1	1	2	2	3	2	2		2
11298	2	24	1	3	1	1	4		3			2	1	1	2					2		500000			1	2				4	PIT HOLE	1		2	1	1	2		1	1	1	2	2	3	2	2		2
10956	2	24	1	2	1	1	5		2	1				1	1				1	2		480000				1				4	PIT HOLE	1		1	2		2		1	1	1	2	1	4	2	2		2
10691	1	12	1	1	3	5	7		3			2	1	6						2		120000				3						1		5	1	1	2		1	1	1	2	1	4	2	2		2
11312	2	24	1	1	3	1	7		3	1		2	2	1	1					2		110000		1	1	6				4	PIT HOLE	1		3	1	1	2		1	1	1	2	2	3	2	2		2
11201	2	24	1	1	3	5	7		3	1		2	2	2	4	1		1		2		170000		2	3	8				4	PIT HOLE	1		4	1	1	2		1	1	1	2	2	3	2	2		2
11301	2	24	2	4	2	1	8	NO JOB	6	1	1	4	6	1	3	1	2		1	1	2	0		10	12	10				4	PIT HOLE	1		3	1	1	2		1	1	1	2	2	3	2	2		2
11315	2	24	1	5	1	2	8	RETIRED	1	1	2	4	6	1	3			1	1	1	2	90000		1	5	8				4	PIT HOLE	1		4	1	1	2		1	1	1	2	2	3	2	2		2
11283	2	24	1	4	1	2	8	RETIRED	1	1	2	2	4	1	3				1	1	2	120000		4	6	15				4	PIT HOLE	1		4	1	1	2		1	1	1	1	2	3	1	2		2
163	3	33	1	4	1	2	8	STONE MINER	6	1	2	1	2	2	3	1		1	1	2		750000										3	TARPAULIN	3	2	2	2		1	1	2	2	2	2	1	1	3	1	1
11217	2	24	1	5	1	2	8	CARPENTER		2		3	2	3	4	1			1	2		150000			3	8				4	PIT HOLE	1		4	1	1	2		1	1	1	2	2	3	2	2		2
11293	2	24	2	4	1	4	1		6			2	3	1	2					2		200000		1	1	8				4	PIT HOLE	1		2	1	1	2		1	1	1	2	2	3	2	2		2
11174	2	24	2	1	2	1	1		1	1		1	1	1	2				1	2		200000		1	1	8				4	PIT HOLE	1		3	1	1	2		1	1	1	2	2	3	2	2		2
11172	2	24	2	1	2	2	1		1	1		2	4	2	3	1	2			2		200000			1	4				4	PIT HOLE	1		4	1	2	2		1	1	1	2	2	3	2	2		2
468	4	41	1	1	1	1	5		2					1	1			1		1	2	200000										1		2	1		2		1	1	1	2	1	3	1	1	2	1	1
11292	2	24	2	4	1	2	1		6			2	3	1	2					2		250000			1	3				4	PIT HOLE	1		3	1	1	2		1	1	1	2	2	3	2	2		2
11296	2	24	1	3	1	1	2		1		2	4	2	1	3		1		1	2		250000			1	5				4	PIT HOLE	1		2	1	1	2		1	1	1	2	2	3	2	2		2
11287	2	24	2	5	1	4	1		6	1		2	2	1	2		1	1		2		300000			1	6				4	PIT HOLE	1		3	1	1	2		1	1	1	2	2	3	2	2		2
11215	2	24	2	4	1	4	1		2			1	2	1	2					2		300000				4				4	PIT HOLE	1		2	1	2	2		1	1	1	2	1	3	2	2		2
11190	2	24	2	3	1	4	1		6			3	2	1	2					2		300000		2	2	5				4	PIT HOLE	1		3	1	1	2		1	1	1	2	1	3	2	2		2
10951	2	24	2	2	2	2	1		1		1	2	3	1	2					2		300000			1	5				4	PIT HOLE	1		3	1	1	2		1	1	1	2	2	3	2	2		2
10948	2	24	2	2	2	4	1		1		1	1	2	1	2					2		300000		1	1	7				4	PIT HOLE	1		3	1	1	2		1	1	1	2	2	3	2	2		2
176	2	25	1	2	1	1	2		6	1	1	2	3	3	1	0	0	0	2	1	1	300000		2	3							1		9	1	1	2		1	1	1	2	2	1	1	1	3	1	1
11177	2	24	1	2	1	1	8	MASON	2	1		2	1	2	3	1				2		300000				2				4	PIT HOLE	1		3	1	2	2		1	1	1	2	2	4	2	2		2
1504	4	42	1	3	1	2	8	STONE MINER	1		2	1		2		1			1	1	1	300000				2	2					1		3	1	2	2		1	1	2	2	2	2	1	1	3	1	1
11320	2	24	2	2	2	2	1		1	1	1	2	3	1	3					2		350000		1	1	7				4	PIT HOLE	1		2	1	1	2		1	1	1	2	2	3	2	2		2
11309	2	24	2	3	2	2	1		1	1	2	2	3	1	3	1			1	1	2	400000		1	2	4				4	PIT HOLE	1		3	1	1	2		2	1	1	2	1	3	2	2		2
11300	2	24	2	4	1	4	1		5			2	3	1	3				1	1	2	400000			1	3				4	PIT HOLE	1		3	1		2		1	1	1	2	2	3	2	2		2
10947	2	24	2	4	2	2	1		6	1	2	3	4	1	3	1	2	1	1	1	2	400000		2	1	6				4	PIT HOLE	1		4	1	1	2		1	1	1	2	2	3	2	2		2
11193	2	24	1	2	1	1	3		1		2	1	2	1	3		1		1	2		400000								4	PIT HOLE	1		3	1	2	2		1	1	1	2	2	3	2	1	2	1	1
11179	2	24	1	2	1	1	8	SAND MINER	1			3	2	3	3		1			2		400000		1	2	6				4	PIT HOLE	1		3	1	1	2		1	1	1	2	2	3	2	2		2
10682	1	12	2	2	1	1	1		6				2	22						2		500000										3		4	1	2	2		1	1	1	2	2	4	2	1	1	1	2
11187	2	24	2	2	2	1	1		6	1	1	2	1	2	3	1				2		500000				6				4	PIT HOLE	1		3	1	1	2		1	1	1	2	2	3	2	2		2
10949	2	24	1	1	1	1	5		1	1		1	1	1	1				1	1	2	500000				2				4	PIT HOLE	1		1	2	2	2		1	1	1	2	2	3	2	2		2
11294	2	24	2	4	2	2	1		6	2	1	4	6	1	3			1		2		600000				8				4	PIT HOLE	1		4	1	1	2		1	1	1	2	2	3	2	2		2
11206	2	24	2	3	1	3	1		2	1		2	1		2		1			2		600000			2	5				4	PIT HOLE	1		2	1	1	2		1	1	1	2	1	4	2	2		2
11280	2	24	1	1	1	5	5		2	1				1	1			1		2		600000								4	PIT HOLE	1		2	1	2	2		1	1	1	2	1	3	2	2		2
11316	2	24	1	3	1	2	1		2			1	2	1	2					2		700000			1	4				4	PIT HOLE	1		4	1	1	2		1	1	1	2	1	3	2	2		2
11306	2	24	1	1	1	5	5		1	1				1	1					2		700000								4	PIT HOLE	1		1	2	2	2		1	1	1	2	1	3	2	2		2
11279	2	24	1	2	1	1	5		2	1			1	1	1			1		2		700000								4	PIT HOLE	1		1	1	2	2		1	1	1	2	1	3	2	2		2
11218	2	24	1	2	1	1	5		3		1			1	1					2		700000								4	PIT HOLE	1		1	2	2	2		1	1	1	2	1	3	2	1	1	1	1
11212	2	24	1	2	1	1	5		2					2						2		700000								4	PIT HOLE	1		1	2	2	2		1	1	1	2	1	3	2	2		2
11182	2	24	1	1	1	1	5		2					1						2		700000								4	PIT HOLE	1		1	2	2	2		1	1	1	2	1	3	2	2		2
11180	2	24	1	2	1	6	6		3			1		1						2		700000								4	PIT HOLE	1		1	2	2	2		1	1	1	1	2	3	1	2		2
11281	2	24	1	3	1	1	2		1	1		3	2	1	2			1		2		800000		1		4				4	PIT HOLE	1		3	1		2		1	1	1	1	2	3	2	2		2
11291	2	24	1	3	1	6	5		3	1		2		1	2				1	2		800000		2	1	4				4	PIT HOLE	1		2	1	1	2		1	1	1	2	2	3	2	2		2
11285	2	24	1	2	1	5	5		2	1				1	1				1	1	2	800000								4	PIT HOLE	1		1	1	2	2		1	1	1	2	1	3	2	2		2
11288	2	24	1	3	1	1	6		2	1		2	4	1	2				1	1	2	800000		1	1	5				4	PIT HOLE	1		3	1	1	2		1	1	1	1	2	4	2	2		2
11194	2	24	1	3	1	1	6		2	1		4	2	3	2	1				2		800000		2	2	7				4	PIT HOLE	1		4	1	1	2		1	1	1	1	2	3	2	2		2
11221	2	24	1	3	1	6	5		2	1		2	1	1	3				1	2		900000			3					4	PIT HOLE	1		4	1	2	2		1	1	1	1	1	3	2	2		2
11197	2	24	2	1	2	2	1		2	1	1	1	2	2	5		1	1	1	1	2	100000			1	6		6	DUCKS 2	4	PIT HOLE	1		4	1	1	2		1	1	1	2	2	3	2	2		2
174	3	31	1	2	1	3	1		1			1	2	1	1					2		100000								4	PIT HOLE	3	TARPAULIN	2	2	2	2		1	1	1	2	2	4	2
11497	3	32	1	3	1	1	2		6			2			3					1	2	100000				8						1		3	2	2	2		2	1	2	2	2	4	1	2		2
11319	2	24	1	2	1	1	5		2	1			2	1	1			1		2		100000		1	1	2				4	PIT HOLE	1		1	2	2	2		1	1	1	2	1	3	2	2		2
11219	2	24	1	2	1	5	5		3					1						2		100000				2				4	PIT HOLE	1		1	2	2	2		1	1	1	2	1	3	2	2		2
11214	2	24	1	2	1	1	5		2		1	1		1	1				1	1	2	100000			3					4	PIT HOLE	1		1	2	2	2		1	1	1	2	1	3	2	2		2
11213	2	24	1	1	1	5	5		3		1			1	1				1	2		100000				4				4	PIT HOLE	1			1	2	2		1	1	1	2	1	3	2	2		2
11208	2	24	1	2	1	5	5		2					1						2		100000								4	PIT HOLE	1		1	2	2	2		1	1	1	2	2	3	2	2		2
11307	2	24	1	1	1	1	1		1	1				1						2		120000								4	PIT HOLE	1		1	2	2	2		1	1	1	2	1	3	2	2		2
11324	2	24	2	1	2	2	1		1		3	2	4	1	3		1			2		120000			1	5				4	PIT HOLE	1		3	1	1	2		1	1	1	2	2	3	2	2		2
11274	2	24	1	3	1	1	6		1	1	1	2	1	1	2				1	1	2	120000				6				4	PIT HOLE	1		3	1	2	2		1	1	1	2	2	3	2	2		2
11200	2	24	2	4	2	4	1		6		1	3	2	2	3		1			2		150000				5				4	PIT HOLE	1		3	1	1	2		1	1	1	2	2	3	2	2		2
991	4	42	1	4	1	4	1		1			2	2	2						2		150000				5				4	PUBLI	1		2	2	2	2		2	1	1	2	2	3	2	1	1	2
284	2	24	1	2	1	1	2		2	0	0	1	0	2	1	0	0	0	0	2		150000										2		2	2	2	2		1	1	2	2	2	4	2	1	1	1	1
11310	2	24	1	1	1	1	5		3		1		2	1	1			1		2		150000								4	PIT HOLE	1		2	1	2	2		1	1	1	2	1	3	2	2		2
11276	2	24	1	1	1	5	5		2	1		1		1	1			1		2		150000		1	2					4	PIT HOLE	1		1	2	2	2		1	1	1	2	1	3	2	2		2
11275	2	24	1	1	1	5	5		2	1		1		1	1			1		2		150000			1	1				4	PIT HOLE	1		1	2	2	2		1	1	1	2	1	3	2	2		2
11220	2	24	1	3	1	1	6		2	1		3	4	2	3		1		1	1	2	150000				15				4	PIT HOLE	1		4	1	1	2		1	1	1	1	2	3	2	2		2
1503	4	42	1	2	1	4	5		6	1			2		1		1		1	1	1	180000										2		2	2	2	2		1	1	2	2	2	4	2	2
10959	2	24	1	1	1	1	1					1		1	1							200000		1	1	2				4	PIT HOLE	1		1	2	2	2		1	1	1	2	1	3	2	2		2
10649	3	32	1	2	1	2	1		1			4	3		1				2	1	2	200000			2	8				4	PUBLIC TOILET	1		4	1	2	2		1	1	1	2	2	4	1	1	2	2
10615	3	32	1	4	1	2	2					2	2	1	2			1		1	2	200000		2		4						1		3	1	1	2		1	1	1	2	2	2	1	1	2	1	1
11311	2	24	1	1	1	1	5		2	1		1		1	1			1		2		200000			2					4	PIT HOLE	1		2	1	2	2		1	1	1	2	1	3	2	2		2
11159	2	24	1	2	1	1	5		1	1		1	1	1	1				1	1	2	200000				2				4	PIT HOLE	1		1	2	2	2		1	1	1	2	1	3	2	2		2
11158	2	24	1	1	1	1	5		2					1						2		250000								4	PIT HOLE	1		1	2	2	2		1	1	1	2	1	4	2	2		2
10953	2	24	2	2	2	2	1		6	1		2	3	1	2				2	1	2	300000		1	1	5				4	PIT HOLE	1		3	1	1	2		1	1	1	2	2	3	2	2		2
139	2	25	1	3	1	6	2		6			2	2							1	2	300000		2	3	4						1		4	1	1	2		2	1	2	2	2	4	2	2		2
156	3	33	1	2	1	1	5		1	1	1	1		1	1				1	1	1	300000		2		3				4	PIT HOLE	1		2	2	2	2		1	1	1	2	1	3	2	1	1	1	1
10958	2	24	1	1	1	1	6		2	1		1	1	1	1				2	1	2	300000		1	1	1				4	PIT HOLE	1		1	2	2	2		1	1	1	2	1	3	2	2		2
452	4	42	1	2	1	1	5		6	1		1		2	1				1	1	1	330000				4						1		4	1	1	2		1	1	1	1	2	2	2			1	1
11171	2	24	1	4	1	2	6		2	1		5	4	1	3		1		1	1	2	400000		1	4	5				4	PIT HOLE	1		6	1	1	2		1	1	1	1	2	3	2	2		2
10640	3	32	1	5	1	1	1		6			2	1							2		500000			1	6				4	PUBLIC TOILET	2		3	1	2	2		1	1	1	2	2	4	2	2		2
10954	2	24	1	3	1	1	5		2					1	1			1		2		700000				1				4	PIT HOLE	1		1	2	2	2		2	1	1	2	1	3	2	2		2
477	4	41	1	4	1	2	2		6	2	2	4	4	2	2	0	0	0	2	1	2	350000										3		7	2	2	2		1	1	1	2	2	2	2	2		2
11414	3	32	2	1	3	5	1		3		1		1	1	3			0	0	1	2	500000	0	0	2	10	0			1		1		3	1	1	2		1	1	1	2	2	3	2	2		2
391	1	11	1	4	1	1	8	CARPENTER	1			2		1	1							300000				1				1		1		3	1	2	2		1	1	1	2	2	4	2	2		1	1
580	2	25	2	2	2	1	1		3	1	4	2		1	4		10	1		1	2	500000				10				1		1		4	2	2	2		1	1	2	2	2	2	2	1	3	1	1
136	3	33	1	1	1	1	2		5	1	2		1	1	1			1	1	2		500000				5				1		1		4	1	2	2		1	1	1	2	2	3	2	1	1	1	1
173	2	25	1	2	1	1	2		1	1	2	3	3	2	0	0	0	2	2	1	1	500000		2	3					1		1		9	1	1	2		1	1	1	2	2	1	1	1	3	1	1
10678	3	32	2	2	4	1	1		1		2								1	1	2	600000								1		1		3	1	2	2		1	1	1	2	2	4	2	1		2
1006	4	42	2	1	1	5	1		2			1			1					1	1	600000				3				1		1		1	2	2	2		2	1	1	2	2	3	1	2
1013	4	42	2	4	1	3	1		6					2	1					2		600000				4				1		1		2	2	2	2		2	1	2	2	2	1	2	2	1	1	1
337	2	23	1	3	1	1	7		4	0	0	2	2	3	1	0	0	1	0	2		600000								1		2		2	2	2	2		1	1	1	2	2	3	2	1	1	1	1
12249	2	24	2	2	1	6	1		6	1	1	1	2	0	1			0	0	1	2	100000		1	2	5				1		2		2	1	2	2		2	1	1	2	2	3	2	1	3	1	1
12249	3	33	2	2	1	6	1		6	1	1	1	2	0	1			0	0	1	2	100000				5				1		2		2	1	2	2		2	1	1	2	2	3	2	1	3	1	1
1073	4	42	2	4	1	4	1		1					2	2					2		100000				2				1		1		2	2	2	2		1	1	1	2	2	2	1	1	2	1	1
10670	3	32	1	5	1	4	2		6					5						2		100000			4	10				1		2		1	2	2	2		2	1	1	2	2	3	2	1	1	2
180	2	25	1	1	1	2	3		1	1	0	3	4	2	3	1	0	0	0	1	1	100000	2							1		2		6	1	1	2		1	1	1	1	1	1	2	2		1	1
10643	3	32	1	5	1	1	4		1	1		4	2	1	4					1	2	100000		1	1					1		1		4	1	1	2		1	1	1	2	2	4	2	1	2	2
23	3	34	1	2	1	2	5		5	2	1	1	1	1	2					1	1	100000								1		2		4	1	2	2		2	1	1	2	1	2	2	1	2	1	1
10303	2	24	2	2	2	1	1		2			2	3	1				1		1	1	150000				4				1		1		6	1	1	2		2	2	1	2	2	2	2	1	1	1	1
10677	3	32	2	2	4	1	2		6	1	2	1	2					1		1	2	150000								1		2		3	1	2	2		1	1	1	2	2	4	2	1	1	2
12029	3	33	2	2	2	1	2		6	3	0	0	0	1	2	0	0	1	0	1	2	150000	0	0	0	1	0			1		1		3	2	2	2		2	1	2	2	2	4	1	1	1	1	1
10610	3	32	1	1	1	1	3		6	1			2	1	1			0	0	1	1	150000	0	0	3	0	0			1		1		3	1	1	2		2	1	2	2	2	2	2	1	1	2
10692	3	32	1	4	1	1	4		1			4	3					1		1	2	150000				1				1		1		3	1	1	2		2	1	1	2	2	3	2	1	1	2
10896	2	23	2	1	2	6	8	DISABLE	6	1	2		1	1	2			1	2	1	1	150000								1		1		2	1	2	2		1	1	1	2	2	2	1	1	2	1	1
100	2	25	1	1	1	1	1		5	1	1	2	2	1	2					1	2	200000				4				1		2		3	1	2	2		1	1	2	2	2	2	2	1	2	1	1
11416	3	32	1	1	1	1	1		3		1	1		1	1			1	0	1	1	200000	0	1	6	3	0			1		1		5	1	1	2		1	1	1	2	1	3	2	1	3	2
311	2	23	1	3	1	2	2		6				2	2	2	0	0	0	0	2		200000								1		3		3	2	2	2		1	1	1	2	2	2	2	1	2	1	1
10679	3	32	1	1	1	1	2		2		2									1	2	200000								1		2		1	1	2	2		2	1	1	2	2	3	2	2		2
10703	3	32	1	3	1	1	3		6	2		2	3	1						1	2	200000								1		2		4	1	2	2		1	1	1	2	2	4	2	1	1	2
10691	3	32	1	4	1	2	3		6			1	1							2		200000								1		2		3	1	2	2		2	1	1	2	2	4	2	2
10674	3	32	2	3	1	4	2		6			3	2	2						2		250000				10				1		2		3	2	1	2		1	1	1	2	2	3	2	1	3
510	2	23	1	2	1	1	1		6	1	2	1	1	1				1	2	1	1	300000			3					1		2		4	1	1	2		1	1	1	2	2	2	1	1	1	1	1
1198	4	42	1	1	2	1	1		2	1								2		2		300000				4				1		2		1	2	1	2		1	1	1	2	2	2	1	2		2
12048	2	23	1	1	1	2	5		3	2	1	0	0	1	2	0	0	0	1	2		300000	0	3	2	3	0			1		2		5	2	1	2		1	1	1	2	2	3	2	1	1	1	1
12048	3	33	1	1	1	2	5		3	2	1	0	0	1	2	0	0	0	1	2		300000	0	3	2	3	0			1		2		5	2	1	2		1	1	1	2	2	3	2	1	1	1	1
10672	3	32	1	3	1	1	2		6	1	2	2	1					1		1	2	320000			1	2				1		1		4	2	2	2		1	1	1	2	2	4	2	1	3	2
3029	2	22	1	2	1	1	1		6		1	1			2	1			2			400000								1		1		2	1	2	2		1	1	1	2	2	5	2	2		2
3029	4	42	1	2	1	1	1		6		1	1			2	1			2			400000								1		1		2	1	2	2		1	1	1	2	2	5	2	2		2
10668	3	32	1	2	1	1	2		6	1	1	1						1		1		400000			3	2				1		2		2	2	1	2		2	1	1	2	2	4	2	1	1	2
281	1	11	1	2	1	1	4		1	1		1	2						1	2		400000				4				1		1		2	1	2	2		1	1	1	2	1	4	2	1	1	1	1
11605	2	22	1	1	1	1	1		3	1		1		1	1				1	1	1	450000				4				1		1		2	1	1	2		1	1	1	2	2	3	2	1	1	1	1
1742	4	42	1	1	4	5	8	WHEELBARROW RIDER	5		1	1		3	2			1		1	1	450000				3				1		1		4	1	2	2		1	1	1	2	1	2	1	1	3	1	1
256	2	25	2	2	1	2	1		6	2	1	3	1	2	2				2	1	2	500000	1							1		1		5	1	2	2		1	1	1	2	1	3	1	1	2	1	1
90	3	34	1	1	1	1	1		1			1	1	1	1			0	0	1	1	500000				2				1		1		3	2	1	2		1	1	1	2	2	4	2	1	1	1	1
10363	1	11	1	1	1	1	5		2	1		1						1		1	1	500000				4				1		1		3	1	1	2		1	1	1	2	1	3	2	2		1	1
515	2	23	1	2	1	1	1		5		1	2	1	6	1				1	1	1	550000	1	2	3					1		2		5	1	1	2		1	1	1	2	2	2	1	1	2	1	1
1202	4	42	1	3	1	2	1		3	2									1	2		550000			2	4				1		1		6	1	2	2		1	1	1	2	2	3	2	1	4		1
10387	2	23	1	1	1	1	5		3	2	1	1	1	1						1	2	600000			2					1		1		4	1	1	2		1	1	1	2	1	2	1	1	1	1	1
10504	2	22	1	1	1	6	5		1		2			1	1				1	1	2	700000			3					1		1		3	1	1	2		1	1	1	2	2	3	2	2		2
10494	2	22	1	1	1	6	5		3	1	1			1					1	1	1	700000		2		4				1		2		3	2	1	2		2	1	1	2	2	3	2	1	2	1	1
10491	2	22	1	1	1	2	5		3	1		2	1	1	2			1		1	1	700000				4				1		2		4	2	2	2		1	1	2	2	2	3	2	2		2
522	2	23	1	2	1	1	8	CATTLE REARER	5	1						1		1		1	1	650000	1		2					1		2		1	1	1	2		1	1	1	2	2	2	1	1	1	1	1
521	2	23	1	2	1	1	8	CATTLE REARER				2	3	4	1					1	1	1200000	1	2						1		1		4	1		2		1	1	1	2	2	2	1	1	4	1	1
523	2	23	2	1	1	1	8	CATTLE REARER	5	1		1		1	2	1		1	2	1	2	1300000	1		3					1		2		1	1	1	2		1	1	1	2	2	2	1	1	2	1	1
10395	2	23	1	1	1	5	4		3	1	1	1	2	1	4			1	2	1	1	520000			3					1		1		4	1	1	2		1	1	1	2	2	2	1	1	2	1	1
524	2	23	1	2	1	1	8	CATTLE REARER	5	1	1	1	1	2	1			1	2	1	1	210000	1		3					1		2		4	1	1	2		1	1	1	2	2	2	1	1	2	1	1
11700	3	31	1	3	1	2	2		6	1	1	0	1	1	1	0	0	0	1	1	2	500000	0	0	1	0	0			1		2		3	1	2	2		1	1	1	2	2	4	2	1		1	1
3441	4	42	1	1	4	1	1		2	2	0	0	2	1	2	0	0	0	0			650000								2		3		2	2	2	2		1	1	1	2	2	4	2	2
3298	1	11	1	3	1	1	6		2	1	1									2		480000		2						2		1		3	2	2	2		1	1	1	2	2	2	2	2		2
178	2	21	1	3	1	1	6		6	1	1	1	1							2		480000		2		4				2		1		2	1	2	2		1	1	1	1	2	2	2	1	2	1	1
10967	2	24	1	1	3	1	6		2	1		3	1	2	2				1	1	1	480000				4				2		3	ZINC	4	1	1	2		1	1	1	1	2	3	2	1	1	1	1
178	4	42	1	3	1	1	6		6	1	1	1	1							2		480000		2		4				2		1		2	1	2	2		1	1	1	1	2	2	2	1	2	1	1
888	4	42	1	1	1	1	7		4				2	1	1			1		1	2	230000								2		1		1	2	2	2		1	1	1	2	2	4	1	1	2	1	2
138	4	41	2	3	2	1	1		6	0	2	2	4	2	2			2	2	2		200000			3					2		3		8	1	1	2		2	1	1	2	2	2	2	2		2
119	4	42	1	1	2	5	5		2			1	4	1	1					2	2	200000		2						2		1		5	1	1	2		2	1	1	2	1	2	2	1	5	2	2
21	2	25	1	2	1	1	8	DISABLE	1	1			1	1				1		1	2	300000								2		1		1	2		2		2	2	2	2	2	3	1	1	1	2
14016	2	21	2	2	2	1	2		6	1		3	2			1			2	2		500000								2		1		3	2	2	2		2	2	2	2	2	2	2	1		1	1
473	4	42	1	2	3	5	1		6	1	2	1	1	1					1	1	1	600000				4				2		1		4	1	2	2		1	1	1	1	1	4	2	1	1	1	2
405	4	41	2	2	2	2	2		6	0	0	1	4	4	0	0	0	1	1	2		800000			2					2		3		6	1	1	2		2	1	2	2	1	3	2	1	2	1	1
11657	1	11	2	3	1	4	1		6			2	2	1	2					2		100000				2				2		1		6	1	1	2		1	1	1	2	2	4	2	2
11330	2	24	2	2	2	1	1		1	1		2	1	2	3					1	1	100000		1	3					2		1		4	1	1	2		1	1	1	2	2	3	2	1	4	1	1
1017	4	42	2	4	1	4	1		1					2	2					2		100000				2				2		2		2	2	2	2		1	1	1	2	2	2	1	1	2	1	1
2209	4	42	2	1	2	2	1		2	1		2								1	1	100000				4				2		1		2	1	1	2		1	1	1	2	2	1	2	2		2
377	2	21	1	3	1	1	2		6	1		4		1	1							100000				2				2		3		2	2	2	2		2	1	1	2	2	4	2		1	1	1
718	4	41	1	3	2	1	2		1	2	1	3	1	1	1			1			1	100000								2		2			1	2	2		1	1	1	2	2	4	2	1	2	1	1
11192	2	24	1	4	1	2	6		3	1	1	2	4	2	3				1	1	2	100000		2	4	16				4	PIT HOLE	1		4	1	1	2		1	1	1	1	2	4	2	1	2	1	1
1457	4	42	1	1	1	2	8	CONTRACTOR	6	1	2	1	1	4	2	0	0		1	1	1	100000					1			2		1		6	1	1	2		1	1	1	1	1	3	2	1			2
710	4	41	2	2	2	1	1		6		1	3			2					2		120000								2		1		5	1		2		1	1	1	2	2	4	1	1	1	1	1
763	4	42		1	3	1	1		1				1	1	1				2	2		120000								2		1		2	1	1	2		1	1	1	2	2	3	2	1	2	1	1
151	3	33	1	1	1	1	3		6		2	1	1	1	2		1		2	1	2	150000		1		3				2		2		3	2	2	2		1	1	2	2	2	2	1	1	3	1	1
3340	1	11	1	2	1	1	4		2	2	2									2		150000				4				2		2		2	2	2	2		1	1	1	2	2	1	2	2		2
104	1	11	1	1	1	5	1		3			3	2	1	1					1	1	200000				5				2		1		3	1	2	2		1	1	1	2	2			1	1	2
10489	2	22	2	1	2	1	1		2	1				1	1				1	1	1	200000			3	4				2		1		4	1	2	2		2	1	1	2	2	2	2	1	2	1	1
2768	4	42	1	3	1	2	1		6	0	0	2	0	0	0	0	0	0	0	2		200000				2				2		1		3	1	1	2		1	1	1	2	2	4	2	1	2	1	1
10206	4	41	2	1	1	2	2		3	1	1	1	0	0	0	0				2		200000					4			2		2		3	1	2	2		2	2	2	2	1	2	2	1	1	2
11627	1	11	1	1	1	1	4		2			1	1	2	1					1	2	200000			1	4				2		1		3	1	1	2		1	1	1	2	2	4	2	1	1	1	1
24	4	42	2	1	1	1	6		2		1	1							1			200000								2		1		5	1	2	2		1	1	1	2	2	4		1	1	1	1
24	4	42	2	1	1	1	6		2		1	1							1			200000								2		1		5	1	2	2		1	1	1	2	2	4		1	1	1	1
11535	1	11	1	1	1	1	8	CARPENTER	6		1	2	1	1	2					1	2	200000								2		1		3	1		2		1	1	1	2	2	4	2	2		2
3116	1	12	1	2	1	2	8	MASON	4	1	1	1	1	1						1	1	200000								2		1		3	1	1	2		1	1	1	2	2	4		1	4	1	1
204	2	21	1	2	1	1	2		4			1	2	1	1	2	1			2		250000			15	4				2		3	ZINC	4	1	1	2		1	1	1	2	1	3	2	1	2	1	1
753	1	11	1	3	1	1	4		2	0	1	1	1	1	0	0	0	0	0	2		250000								2		1		3	1	2	2		1	1	1	1	1	4	2	1	2	1	1
537	2	25	2	3	1	4	1		6			3	2	1	1		1		1	2		290000		2						2		1		5	1	2	2		1	1	2	1	2	1	2	1	3	1
11000	1	12	1	2	1	6	1		3			1	1							2		300000								2		1		10	1	1	2		2	1	1	2	2	3	2	1	3	1	1
11000	2	22	1	2	1	6	1		3			1	1							2		300000								2		1		10	1	1	2		2	1	1	2	2	3	2	1	3	1	1
12046	3	33	1	2	1	1	1		4	0	0	1	0	1	0	1	1	0	0	2		300000	0	0	0	0	0			2		1		4	1		2		1	1	1	2	2	3	1	1	2	1	1
937	4	42	2	2	1	4	1		6			1	1		1					2		300000				3				2		1		2	2	2	2		1	1	1	2	2	3	1	2		2	2
1486	4	42	1	1	1	1	1		1	1				1	1					1	1	300000								2		1		1	2	2	2		1	1	1	2	2	3	2	1	1	1
88	4	42	1	1	1	1	1		6	1		1								1	1	300000				5				2		1		4	1	2	2		1	1	1	2	2	5	1	1	1	1	1
88	4	42	1	1	1	1	8	CARPENTER	6	1		1								1	1	300000				5				2		1		4	1	2	2		1	1	1	2	2	5	1	1	1	1	1
8	1	11	1	2	1	1	8	WELDER	1	1								0	0	1	2	300000					2			2		3		3	1	2	2		1	1	1	1	2	4	2	2		2
1212	4	42	2	3	1	1	1		6		10	2	1	3					2	2		380000				2				2		2		2	2	2	2		2	1	2	2	2	3	2	2		1	1
3585	4	42	2	2	2	1	1		1		1	1	1		2		2	0	2	1	2	400000								2		1		4	2	2	2		1	1	1	2	2	2	2	2		2
108	4	42	1	2	1	1	1		3			3			2					2		400000				1				2		1		3	1	1	2		1	1	1	2	2	1		1	2	1	1
108	4	42	1	2	1	1	6		3			3			2					2		400000				1				2		1		3	1	1	2		1	1	1	2	2	1		1	2	1	1
935	4	42	1	4	1	1	8	BLACK SMITH	6	1				1	1				2	1	1	419000								2		1		1	2	2	2		1	1	1	2	2	3	1	1	1	1	1
3449	1	11	2	2	2	1	1		6	1	1	2								2		500000				12				2		1		3	2	1	2		1	1	1	1	2	4	2	1	1	1	1
11604	2	22	2	2	2	1	1		6	2	2	3	1	3	1			1		1	1	500000			3	4				2		1		5	1	1	2		1	1	1	2	2	3	2	1	3	1	1
13500	2	22	1	2	1	1	1		3	2		2								2		500000		2						2		1		2	1	1	2		1	1	1	2	1	4	2	1	1	1	1
12051	2	23	1	3	1	1	1		4	0	0	1	2	1	2	0	0	0	0	2		500000	0	3	1	0				2		1		6	2	2	2		2	1	1	1	2	2	2	1	1	1	1
1003	3	31	2	1	3	5	1		3	1	2	2								2		500000				4				2		1		2	1	2	2		1	1	1	2	2	2	2	1	1	1	1
12051	3	33	1	3	1	1	1		4	0	0	1	2	1	2	0	0	0	0	2		500000	0	3	1	0				2		1		6	2	2	2		2	1	1	1	2	2	2	1	1	1	1
2208	4	42	2	2	2	5	1		2											1	1	500000								2		1		1	2	2	2		1	1	1	2	2	2	2	2		2
1003	4	42	2	1	3	5	1		3	1	2	2								2		500000				4				2		1		2	1	2	2		1	1	1	2	2	2	2	1	1	1	1
1143	1	13	1	2	1	1	1		3	2		2								2		500000		2						2		1		2	1	1	2		1	1	1	2	1	4	2	1	1	1	1
21700	1	12	1	2	1	1	4		2			2	1	1	1					2		500000								2		1		3	1	2	2		1	1	1	2	2	3	2	1	1	1	1
21700	2	22	1	2	1	1	4		2			2	1	1	1					2		500000								2		1		3	1	2	2		1	1	1	2	2	3	2	1	1	1	1
3471	4	42	1	2	1	1	4		2			2	1	1	1							500000								2		1		2	1	2	2		1	1	1	2	2	4	2	1	1	1	1
4098	3	31	1	2	1	1	5		6	1	2	1	1	1					1	1	2	500000				4				2		2		3	1	2	2		1	1	1	2	1	4	2	1	1	1	1
4098	4	42	1	2	1	1	5		6	1	2	1	1	1					1	1	2	500000				4				2		2		3	1	2	2		1	1	1	2	1	4	2	1	1	1	1
31	2	25	1	2	1	1	6		3		2			1	1					1	1	500000								2		3	ZINC	5	1	2	2		1	1	1	2	2	3	2	2		2
337	4	42	1	2	1	2	8	STREET BEGGER	2		1	1	2	1	2				2	1	2	500000								2		1		1	2	2	2		2	1	1	2	2	4	2	2		2	2
396	4	42	1	2	1	1	4		1			1		1	1					2		550000								2		1		1	1	1	2		1	1	1	2	2	3	2			2	2
473	2	22	1	2	3	5	1		6	1	2	1	1	1					1	1	1	600000				4				2		1		4	1	2	2		1	1	1	1	1	4	2	1	1	1	2
10736	2	22	1	2	1	2	1		2	2	1	2	3	4	2				1	1	2	600000			3	4				2		1		4	1	1	2		1	1	1	2	2	3	2	1	2	2
405	2	24	1	3	1	1	1		3		2	2	1	1	1			1	0	1	2	600000								2		1		4	1	2	2		1	1	1	2	2	3	2	1	2	1	1
4086	3	31	1	2	1	1	1		1	1	2	1	1	1	1				1	1	2	600000				4				2		2		3	1	2	2		1	1	1	2	2	3	2	1	1	1	1
4086	4	42	1	2	1	1	1		1	1	2	1	1	1	1				1	1	2	600000				4				2		2		3	1	2	2		1	1	1	2	2	3	2	1	1	1	1
420	4	41	1	4	1	4	2		5	0	0	0	1	4	2	0	0			2		600000			2					2		3		5	1	1	2		1	1	2	2	2	3	2	1	4	1	1
341	2	24	2	4	2	1	4		6	1	0	3	1	2	1	0	0	1	0	2		600000		2		4				2		3		4	2	1	2		1	1	1	2	2	3	2	1	1	1	1
950	4	42	1	1	1	5	5		3					2	1					2		600000								2		1		2	1	2	2		1	1	1	2	1	1	2	1	2	1	1
4150	3	31	1	4	1	1	6		2	2										2		600000	1			4				2		1		4	1	1	2		1	1	1	2	1	2	1	1	2	1	1
4150	4	42	1	4	1	1	6		2	2										2		600000	1			4				2		1		4	1	1	2		1	1	1	2	1	2	1	1	2	1	1
12132	2	24	1	2	1	3	1		5			2	1								2	650000								2		1		2	1	2	2		1	1	1	1	1	3	2	2		2
10321	4	42	2	1	2	2	1		6	1	1	1								2		650000				4				2		2		3	2	2	2		1	1	1	2	2	1	2	2		2
11602	2	22	2	2	2	1	1		1		1	1	1	2	2				1	1	2	700000				4				2		1		3	1	1	2		1	1	1	1	2	3	2	2		2
2008	4	42	2	1	1	1	1		3	0	0	1	0	1	4	2	0	0	0	2		700000				2				2		3		3	1	2	2		1	1	1	2	2	1	1	1	2	2
1191	4	42	2	3	2	3	1		1													700000								2		1		3	2	2	2		1	1	1	2	2	2	2	2		1	2
11130	1	12	1	2	1	2	2		5			2	1	2	1					2		700000		1	2	4				2		1		3	1	1	2		1	1	1	2	1	3	2	2		1	1
212	3	34	1	2	1	2	6		5	1		1	2	1	2				1	1	2	700000		3	1					2		1		4	2	1	2		1	1	1	1	2	5	2	1	3	1	1
20900	1	12	1	2	1	2	8	WELDER	4			1	1	2	1					2		700000								2		1		3	1	2	2		1	1	1	2	1	3	2	2		2
20900	2	22	1	2	1	2	8	WELDER	4			1	1	2	1					2		700000								2		1		3	1	2	2		1	1	1	2	1	3	2	2		2
936	4	42	2	2	1	4	1		6			1	1		1					2		711000				4				2		1		2	2	2	2		1	1	1	2	2	3	1	1	2	1	1
10505	2	22	2	2	2	1	1		3		1	1		1	2			1		1	1	800000		2	3	4		6	DUCKS 5	2		1		4	1	1	2		1	1	1	2	2	3	1	1	1	1	1
91	3	34	1	2	1	2	1		1		1	1	1	2	2				2	1	1	800000		7	3	13		10		2		1		5	1	1	2		1	1	1	2	1	4	1	1	2	1	1
2659	4	42	1	4	1	1	1		2			1	2	1	1	2						800000								2		3		3	1	1	2		1	1	1	2	2	4	2	2		1	1
2658	4	42	1	2	1	1	4		4	1		1	2	1	2	1			2			800000								2		3		3	1	1	2		1	1	1	2	2	3	2	1	2	1	1
10964	2	24	1	3	1	1	6		2		1			1	2	1				1	1	800000								2		3	ZINC	3	1	2	2		1	1	1	1	2	3	2	1	1	1	1
922	4	42	2	3	1	4	1		1			3			1					2		819000								2		1		2	2	2	2		1	1	1	2	2	4	1	1	2	1	1
1044	4	42	2	1	2	5	1		3		1									2		900000								2		1		2	1	1	2		1	1	1	2	1	3	2	1	1	1	1
1454	4	41	1	2	1	2	5		4			1			2			1	0	1	1	900000			1					2		3	ZINC	3	1	1	2		1	1	1	2	1	3	1	1	1	1	1
1703	4	41	1	4	1	2	6		1				2	3	3					2		900000								2		1		4	1	2	2		1	1	1	2	1	4	2	2
10729	4	42	1	3	1	2	6		5	0	3	1	0	6	4	0	0	1	1	1	2	950000			2					2		1		6	1	1	2		1	1	1	1	1	4	2	2		2
11587	2	22	2	2	2	1	1		2			1	1	1	1					2		1000000				4				2		1		3	1	1	2		1	1	1	2	2	2	2	2		2
2204	4	42	1	3	1	2	1		3			1		2						2		1000000				4				2		2		4	1	2	2		1	1	1	2	2	2	2	2		2
795	3	31	1	2	1	6	5		3	1	1	1								2		1000000								2		1		2	1	1	2		1	1	1	1	2	2	2	1	1	1	2
795	4	42	1	2	1	6	5		3	1	1	1								2		1000000								2		1		2	1	1	2		1	1	1	1	2	2	2	1	1	1	2
10397	2	23	2	1	2	5	7		3	2	1		1	3	4	1		2	1	1	2	1000000	1	2	3	4				2		1		4	1		2		1	1	1	2	1	2	1	1	4	1	1
43	4	42	1	2	1	2	3		3	2	1	1	1	1	4	1	1		2	1	1	350000				4				2		1		4	1	1	2		1	1	1	2	2	2	1	1		1	1
882	4	42	1	2	1	2	4		2			1	2	1	2					2		500000								2		1		2	2	2	2		1	1	1	2	2	3	1	1	3	1	1
12170	1	13	2	3	3	4	2		6	0	0	2	0	0	1	1	0	0	0	2		600000		4	6	12				2		1		3	1	1	2		1	1	2	2	2	3	1	2		2
12170	2	24	2	3	3	4	2		6	0	0	2	0	0	1	1	0	0	0	2		600000		4	6	12				2		1		3	1	1	2		1	1	2	2	2	3	1	2		2
12170	3	33	2	3	3	4	2		6	0	0	2	0	0	1	1	0	0	0	2		600000		4	6	12				2		1		3	1	1	2		1	1	2	2	2	3	1	2		2
10401	2	23	2	2	2	1	1		3	1		2	1	4	6		1	1	1	1	1	480000	1		3					2		1		5	1	1	2		1	1	1	2	1	2	1	1	4	1	1
10748	2	23	1	2	1	1	1		3	3	2	2		1	1		1		1	2		520000								2		1		2	1	2	2		1	1	1	2	1	2	1	1	2	1	1
10768	2	23	2	2	2	1	1		2	1		2	3	1	2			1	2	1	1	420000								2		1		4	1	1	2		1	1	1	2	2	2	2	1	1	1	1
10413	2	23	2	2	2	1	5		3	1	1	2	1	1	2			1		1	1	450000								2		1		6	1		2		1	1	1	2	1	2	1	1	2	1	1
10759	2	23	1	2	1	1	1		1			2	1	1	1					2		700000				4				2		1		6	1	2	2		1	1	1	2	2	2	1	1	2	1	1
1178	4	42	1	2	2	1	1		1			2	2					1		2		700000								2		1		4	1	2	2		1	1	1	1	1	3	2	2		2
10738	2	23	1	1	1	1	1		1	1	2		2	4	1			1	1	1	1	210000								2		1		4	1	1	2		1	1	1	2	1	2	2	2		1	1
918	4	42	1	2	1	1	2		2			1	1	1	1	2						180000								2		3		4	1	1	2		1	1	1	2	2	4	2	2		1	1
10763	2	23	2	2	2	3	1		2		1	3	2	1	1				1	1	1	180000				4				2		1		4	1	1	2		1	1	1	2	2	2	2	1	3	1	1
10408	2	23	1	2	1	1	4		3	1	4	1	2	2	2			1	4	1	1	200000								2		1		4	1	1	2		1	1	1	2	1	2	1	1		1	1
10767	2	23	2	2	2	1	1		3			5	6	2	1			1		1	1	200000				4				2		1		5	1	1	2		1	1	1	2	2	2	2	1	4	1	1
11645	1	11	2	3	2	1	1		6			3	4	2	2					1	2	650000		4	5	5		6	DUCKS 10	3		1		4	1	2	2		1	1	1	2	2	4	2	2		2
10100	2	21	2	2	2	1	1		1		1		3	1	1			1	1	2		650000		4	2	6				3		1		4	1	1	2		1	1	1	2	1	3	2	2		1	1
14037	2	21	2	5	4	4	1		6					4	3	1						650000				4				3		1		3	2	2	2		1	1	1	2	2	2	2	1	2	1	1
10300	2	24	1	1	3	5	1		3		1			1	2					2		650000								3		1		2	1	2	2		2	1	1	2	2	5	2	1	1	2
160	3	33	2	3	1	4	1		6		1	1	2	3	2				1	2		650000								3		2		3	2	2	2		1	1	2	2	2	2	1	1	2	1	1
166	3	33	1	2	1	1	1		6		1	2	1	2	3	2			1	2		650000								3		3	TARPAULIN	4	2	2	2		1	1	1	2	2	3	2	1	2	1	1
12209	3	33	2	2	2	1	1		2	1	0	1	2	1	1			0	1	1	2	650000								3		1		4	1	2	2		2	1	1	2	2	3	1	1	2	1	1
56	4	41	2	1	2	1	1		2			3		1	1					2		650000								3		1		2	2	1	2		1	1	1	2	2	4	2	1	1	1	1
3443	4	42	1	1	4	1	1		2	0	0	0	0	1	1	2	0	0	0			650000								3		3		2	2	2	2		2	1	1	2	2	4	2	2		2
1466	4	42	2	2	1	1	1		6	1	0	1	1	1	1			1	1	2		650000		1		2				3		2		2	2	2	2		1	1	1	2	2	3	2	2		2
1449	4	42	1	2	1	6	1		1	8		2	1							2		650000								3		1		2	2	2	2		2	1	1	2	2	3	2	2
1450	4	42	1	3	2	2	1		6	2	1	1	2	1	2		1	1	2	2		650000				3				3		1		3	2	2	2		1	1	2	2	2	3	1	1	3	1	1
47	1	13	1	2	1	1	2		6	1	2	1	2	1	1				1	2		400000				8				3		1		2	1	1	2		1	1	1	2	1	5	2	1	2	1	1
88	1	13	1	2	1	1	2		4	1		2	1	1	1					2		400000		2		4				3		1		2	1	1	2		1	1	1	2	2	5	2	1	1	1	1
93	1	13	2	3	1	1	2		1			2	1	1	1					1	1	400000	1	6		10				3		1		2	1	1	2		1	1	1	2	2	5	2	1	2	1	1
10102	2	21	1	5	1	2	2		1	1	3	2	3	4	2	1	0	0	0	2		400000								3		2		4	2	2	2		2	1	1	2	2	3	1	1	1	1	1
266	2	21	2	4	1	1	2		6	1	2	3		1	1	1		1	1	1	2	400000				2				3			ZINC	3	1		2		1	1	1	2	2	3	1	1	1	1	1
337	2	21	2	2	2	1	2		6			2	3	1								400000				4				3		2			2	2	2		2	2	2	2	2	4	2	2
351	2	21	1	3	1	2	2		6			3		1	1							400000								3		1		6	2	2	2			1	2	2	2	3	1	1	2	1	1
216	2	24	2	4	1	2	2		6	0	7	2	2	0	0	0	0	2	2	2		400000			3	4				3		2		7	1	1	2		2	1	2	2	2	1	1	1	4	2
279	2	25	1	3	1	2	2		6	1	2	2	1	2	2	0	0	1	1	1	2	400000								3		1		7	1	1	2		2	2	1	2	2	2	1	1	2	2
268	2	25	1	5	1	2	2		5	0	0	2	1	2	1	0	0	0	0	2		400000								3		2		8	2	1	2		1	1	1	2	2	2	2	2		1	1
271	2	25	1	2	1	2	2		2	0	3	6	3	2	3	0	0	0	0	1	1	400000								3		1		7	1	2	2		1	1	1	2	2	1	1	1	5	1	1
236	2	25	2	3	1	4	2		6	0	1	3	2	1	2	0	0			1	2	400000				4				3		1		6	1	1	2		1	2	2	2	2	2	2	1	2	1	1
190	2	25	1	2	1	2	2		6	1	3	2	3	2	4			2	2	1	2	400000								3		2		6	2	2	2		2	2	2	2	2	1	1	2		1	1
192	2	25	1	3	2	2	2		6	1	2	3	2	3	2	0	0	1	2	2		400000			3	4				3		1		7	1	1	2		2	1	2	2	2	1	2	1	4	1	1
245	2	25	1	2	2	2	2		6			2	1	1	2					2		400000	3							3		2		4	1	2	2	.	2	2	2	2	2	2	1	1	2	2
189	2	25	1	5	1	2	2		6	5	3	4	10		15		1	4		1	2	400000		2	3	4				3		2		48	1	1	2		2	2	1	2	2	2	1	1	5	1	1
177	3	31	1	3	1	1	2		6		1	2	3	1	2	2	1		1	2		400000				2				3		2		3	1	2	2		1	1	1	2	2	3	2	1	2	1	1
183	3	31	1	4	1	1	2		6		2	1	3	2	3	2	2	1	3	2		400000								3		2			2	2	2		1	1	1	2	2	2	2	1	2	1	1
195	3	31	1	2	1	1	2		6	2	1	2	3	2	2				3	1	1	400000								3		2		3	1	2	2		1	1	2	2	2	3	2	2
201	3	31	1	2	1	1	2		6	2	1	3	4	2	4	1		1	3	2		400000								3		2		3	1	2	2		1	1	1	2	2	2	2	1	3	1	1
226	3	31	2	2	2	1	2		6	2	2	2	2	2	4		1		4	2		350000								3		2			1	2	2		1	1	2	2	2	2	1	1	3	1	1
235	3	31	1	2	4	6	2		6			1	2	2	1					2		350000								3		2		3	1	2	2		1	1	2	2	2	4	2	2		2
171	3	33	1	1	3	5	2		6		3	2	2	4	5	1	2	2	3	1	1	350000								3		2		4	1	2	2		1	1	2	2	2	3	2	1	3	1	1
172	3	33	1	2	1	1	2		6			2	2	3	2	1	2	1	2	1	1	350000		2	1	2				3		2		3	1	2	2		1	1	1	2	2	3	2	1	2	1	1
100	4	41	2	2	2	1	2		6	0	1	0	2							2		350000								3		2			2	2	2		2	1	2	2	2	2	1	1	1	2
1106	1	12	1	2	1	1	2		6	1	2	1	2	1	1				1	2		350000				8				3		1		2	1	1	2		1	1	1	2	1	5	2	1	2	1	1
125	2	21	2	1	3	5	5		3				2	4	6					2		500000				4				3		1		4	1	1	2		1	1	1	2	1	4	2	2		2
474	2	21	1	1	4	5	5		3	1		3			3	2						500000				4				3		1		6	1	2	2		1	1	1	1	2	3	2	1	1	1	1
134	4	42	1	1	4	5	5		3			1		1	2			1		1	1	480000								3		1		3	1		2		1	1	1	2	1	3	2	1	2	1	1
518	4	42	1	2	1	1	5		4	1		1		1	1		1		2	1	2	480000		2		4				3		1		3	1	2	2		1	1	1	2	1	2	2	1	1	1	1
474	4	42	1	1	4	5	5		3	1		3			3	2						480000				4				3		1		6	1	2	2		1	1	1	1	2	3	2	1	1	1	1
134	4	42	1	1	4	5	5		3			1		1	2			1		1	1	480000								3		1		3	1		2		1	1	1	2	1	3	2	1	2	1	1
11185	2	24	1	1	3	5	7		3	1			2	2	1				1	2		150000				1				3		1		3	1	1	2		1	1	1	2	2	3	2	2		2
10661	4	42	1	1	3	5	7		3			2	4	1						2		150000								3		1		9	1	1	2		2	1	1	2	2	3	2	1	1	1	2
1461	4	42	1	3	1	2	8	CONTRACTOR	6	1	2	1	1	0	1			1	2	2		1000000								3		2		3	2	2	2		1	1	2	2	2	3	2	1	2	1	1
176	3	31	2	5	1	4	8	HOUSE WIFE	6	1	2	2	3		2	1	2	1	3	1	1	250000								3		1		5	1	2	2		1	1	1	2	2	3	2	1	3	1	1
204	3	31	2	2	2	1	8	HOUSE WIFE	6			1	3	1	1					2		220000								3		3	TARPAULIN	2	2	2	2		1	1	2	2	2	4	2	2
224	3	31	2	4	2	1	8	HOUSE WIFE	6			2	3	5	4					2		210000								3		2		4	1	2	2		1	1	1	2	2	3	2	1	2	1	1
237	3	31	2	4	2	4	8	HOUSE WIFE	6		2	1	4	2	2				2	1	1	270000				4				3		2		4	1	2	2		1	1	1	2	2	3	2	1	1	1	1
247	3	31	1	1	1	1	8	HUNTER	6		1	1	1	2	2				1	1	1	450000		2	3					3		2		3	1	1	2		1	1	2	2	2	2	2	2		2
13	1	11	1	1	3	5	8	MECHANIC	1	1	1	1	2	2	2					2		800000			3	15				3		1		3	1	2	2		1	1	1	2	2	4	2	1	1	1	1
11290	2	24	1	5	1	2	8	NO JOB	1	2	1	4	3	2	4	1	2		1	1	2	0		1	1	5				3		1		4	1	1	2		1	1	1	2	2	3	2	2		2
10594	3	32	1	2	1	5	8	NOTHING	6					1						2		0								3		1		1	1	2	2		1	1	1	2	2	2	2	1	1	1	1
11314	2	24	1	1	1	2	8	RETIRED	1	2	1	4	6	1	4			1	1	1	2	90000		1	2	15				3		1		4	1	1	2		1	1	1	2	1	3	2	2		2
11191	2	24	1	5	1	2	8	RETIRED	3	1	1	3	1	2	4	1	2	1	1	1	2	90000		3	5	14				3		1		5	1	1	2		1	1	1	2	2	3	2	1	1	2
10551	4	42	1	2	1	1	8	STONE MINER	6	0	1	0	1	1	1	0	1		1	1	1	405000								3		3		2	2	2	2		1	1	1	2	2	3	2	1	2	1	1
249	2	21	2	1	2	1	2		6	2	1	2		1	1				1	2		450000				3				3		3	ZINC	1	1	1	2		1	1	2	2	2	3	2	2		1	1
10326	2	24	1	1	3	5	7		4	1	1	1		3	2					2		210000		4		5				3		1		5	1	1	2		1	1	1	2	1	1	2	1	1	1	1
193	1	13	1	3	1	1	8	CHIEF	3		1	1	3					1		1	1	350000		2		4				3		1		10	1	1	2		1	1	1	2	2	2	1	1	1	1	1
10680	1	12	1	4	1	1	2		6			2	2	2	2							600000			3					3		1		4	2	1	2		1	1	1	2	2	3	2	1	3	1	1
125	3	31	1	2	1	2	8	PALMWINE TAPPER	5	3	4	4	1	4	4	1		2	2	1	1	300000		2	3	4				3		2		8	1	1	2		1	1	1	2	2	2	1	1	4	1	1
125	4	42	1	2	1	2	8	PALMWINE TAPPER	5	3	4	4	1	4	4	1		2	2	1	1	300000		2	3	4				3		2		8	1	1	2		1	1	1	2	2	2	1	1	4	1	1
284	3	31	1	2	1	1	1		1	1	2	2			3				1	1	1	100000		2	3	4	5			3		1		5	1	1	2		1	1	1	2	2	1	1	1	2	1	1
284	4	42	1	2	1	1	1		1	1	2	2			3				1	1	1	100000		2	3	4	5			3		1		5	1	1	2		1	1	1	2	2	1	1	1	2	1	1
4493	4	42	2	4	4	4	1		6	2	2	1	1							2		300000				4				3		2		4	1	1	2		1	1	2	2	2	2	1	1	1	1	1
4493	2	21	2	4	4	4	2		6	2	2	1	1							2		300000		2	3	4				3		2		4	1	1	2		1	1	2	2	2	2	1	1	1	1	1
4496	2	21	1	2	1	2	2		6	1	1	2	2	3					1	1	1	300000		2		4				3		1		6	1	1	2		1	1	2	2	2	1	1	1	2	1	1
12444	4	42	1	3	1	2	1		5	2	3	2	1	4	3			1	1	1	1	400000		2	3	4	5	6	DUCKS 4	3		1		8	1	1	2		1	1	2	2	2	1	1	1	3	1	1
1145	4	42	1	2	4	4	1		6	1	3	4	2	2	4	4		2	1	1	1	400000		2	3	4				3		2		9	1	1	2		1	1	1	2	2	2	1	1	3	1	1
10683	1	12	1	2	1	1	2		3			4		2								400000					4			3		1		3	1	1	2		1	1	1	2	2	3	2	1	1	2
3158	3	31	1	3	1	2	2		6	2	4	4	1	3				1	1	1	1	400000		2	3	4		6	DUCKS 3	3		1		8	1	1	2		1	1	1	2	2	2	2	1	2	1	1
12444	3	31	1	3	1	2	2		5	2	3	2	1	4	3			1	1	1	1	400000		2	3	4	5			3		1		8	1	1	2		1	1	2	2	2	1	1	1	3	1	1
1145	3	31	1	2	4	4	2		6	1	3	4	2	2	4	4		2	1	1	1	400000		2	3	4				3		2		9	1	1	2		1	1	1	2	2	2	1	1	3	1	1
3158	4	42	1	3	1	2	2		6	2	4	4	1	3				1	1	1	1	400000		2	3	4		6	DUCKS 5	3		1		8	1	1	2		1	1	1	2	2	2	2	1	2	1	1
248	4	42	1	2	1	2	8	HUNTER	1	1	3	1	4	1				2	1	1	1	400000		2	3	4				3		1		10	1	1	2		1	1	1	2	2	2	2	1	3	1	1
248	3	31	1	2	1	2	8	HUNTING	1	1	3	1	4	1				2	1	1	1	400000		2	3	4				3		1		10	1	1	2		1	1	1	2	2	2	2	1	3	1	1
10449	2	25	2	2	2	1	1		6	1	2	2	1	1	1	0	0	0	1	1	2	600000								3		2		2	2	2	2		2	1	2	2	2	2	2	1	3	1	1
11384	3	32	1	3	1	1	3		6				2	3						1	2	90000			1					3		1		3	2	1	2		1	1	2	2	2	3	2	1	1	2
10624	3	32	1	2	1	2	8	OPERATOR (POWERSAW)	6				2	3	3					2		90000			3	10				3		1		5	2	1	2		1	1	1	2	2	3	2	2		2
208	3	34	2	2	2	2	2		6			4	3	1	2					1	2	150000				4				3		1		4	1	1	2		2	1	2	2	2	4	2	1	2	1	1
992	4	42	2	2	1	6	1		6			1			1					2		175000				2				3		1		1	2	2	2		1	1	1	2	2	3	2	1	2	1	1
431	2	25	2	4	2	2	2		6	1	3	1	1	2						2		500000								3		1		5	1	2	2		1	1	1	2	2	2	2	1	2	1	1
2024	3	31	1	3	1	1	6		6	1	1	2	1	2					2	1	2	700000			3	4				3		1		3	1	2	2		1	1	1	2	2	2	2	1	1	1	1
2024	4	42	1	3	1	1	6		6	1	1	2	1	2					2	1	2	700000			3	4				3		1		3	1	2	2		1	1	1	2	2	2	2	1	1	1	1
1214	4	41	2	2	2	1	1		1			2	1	1	1					2		200000								3		1		2	1	2	2		1	1	1	2	2	3	2	1	1	1	1
1131	4	42	2	2	1	1	1		1		2	1	1			2				2		300000			8					3		1		3	1	2	2		1	1	1	2	2	3	2	1	1	1	1
38	1	12	1	2	1	1	2		1		2	1	1			2				2		300000			8					3		1		3	1	2	2		1	1	1	2	2	3	2	1	1	1	1
10762	2	23	1	2	1	1	1		4			1	2	3	4				2	1	1	400000								3		1		4	1	2	2		1	1	1	2	2	2	1	1	2	1	1
3153	1	11	1	2	1	1	2		1	1	1	1	1	1				1	2	1	2	500000		8	1	8				3		1		5	1	1	2		1	1	2	2	2	4	2	1	1	1	1
194	1	11	1	2	2	1	2		6	1		1	2							1	1	500000				4				3		1		4	1	2	2		2	2	2	2	2	3	2	1	1	1	1
10348	1	11	1	5	4	3	2		6					4	8					2		500000								3		1		1	1	2	2		2	2	2	2	2	3	2	1	1	1	1
3111	4	42	2	1	2	1	2		1	1	2			1	1	1			2	1	1	500000								3		3	ZINC	5	1	1	2		2	1	1	2	2	3	2	1	1	1	1
189	1	11	2	3	1	4	1		6	1		2	2							2		600000				4				3		1		2	1	2	2		1	2	2	2	2	3	2	1	1	1	1
259	3	31	2	2	2	2	1		2	1	3	2	1	3	1				2	1	1	800000				4				3		1		4	1	1	2		1	1	1	1	2	2	1	1	3	1	1
259	4	42	2	2	2	2	1		2	1	3	2	1	3	1				2	1	1	800000				4				3		1		4	1	1	2		1	1	1	1	2	2	1	1	3	1	1
186	3	31	1	5	1	1	2		1		2	1	3	2	2	2			2	1	1	800000								3		3	TARPAULIN	2	1		2		1	1	1	2	2	3	2	1	1	2
1086	2	21	2	1	1	1	1		2	2								1		1	2	100000								3		1		5	1	2	2		1	2	2	2	2	3	1	1	1	1	1
371	2	21	2	4	2	4	1		6			2			3		1					100000								3		1		6	2	2	2		2	2	2	2	2	4	2		2	1	1
10586	3	32	2	1	3	5	1		3		1			3	1					1	2	100000		2	3			6	PIGEONS 10	3		1		1	2	1	2		1	1	1	2	2	4	2	1	1	1	1
43	4	41	2	1	2	1	1		1		1	1	2	2	1					1	2	100000								3		1		3	1	1	2		1	1	1	2	2	4	2	1	1	1	1
305	1	11	2	4	1	1	2		6				1	1	2			0	0	2		100000								3		1		2	2	2	2		1	1	1	2	2	3	2	1	1	1	1
203	1	11	2	3	1	4	2		6					1	2					2		100000				4				3		1		5	2	2	2		1	1	2	2	2	3	2	1	2	1	1
195	1	11	2	1	2	1	2		3		1	1							2	1	2	100000				4				3		1		1	1	2	2		1	2	1	2	2	3	2	1	1	1	1
332	2	21	2	2	2	1	2		1			1	1	1	1							100000				4				3		1		5	2	2	2		1	2	1	2	2	4	2	2
213	2	24	1	2	1	2	2		1	0	2	2	0	1	2	0	0	1	1	1	1	100000								3		1		3	1	2	2		2	2	1	2	2	3	2	2		2
423	2	25	1	4	1	1	2		6	1	2	4	3	5	2	2	1			1	2	100000			3					3		1		4	1	1	2		1	1	1	2	2	3	2	1	1	1	1
61	2	25	1	2	1	1	2		6			1	1							1	2	100000								3		1		5	1	1	2		2	1	2	2	2	2	2	2
194	3	31	2	2	2	4	2		6	1	2	2	3	2	3			1	3	1	1	100000								3		2		3	1	2	2		1	1	1	2	2	4	2	2
236	3	31	1	4	1	1	2		6			1	1	1	2		1			2		100000				4				3		2		3	1	2	2		1	1	1	2	2	4	2	2		2
245	3	31	1	4	1	1	2		6			1	2	2	3					2		100000								3		2		1	2	2	2		1	1	1	2	2	4	2	2		2
4004	3	31	2	2	1	4	2		6	1	2	1								2		100000		2		4				3		2		2	1	2	2		2	2	2	1	1	1	2	1	1	1	1
11385	3	32	1	3	1	1	3		1			2	2		3					2		100000			1	3				3		1		3	2	1	2		2	2	1	2	2	3	2	2		2
3006	1	11	2	3	1	3	4		3	1	1	2	1					1		2		100000				4				3		1		2	1	2	2		1	1	1	2	2	3	2	1	1	1	1
10364	1	11	1	4	1	1	4		6			1		1						2		100000				4				3		1		3	1	2	2		2	2	2	2	2	2	1	1	1	1	1
869	4	42	2	2	2	1	4		2						3					2		100000				4				3		1		2	2	2	2		1	1	1	2	2	2	2	2		2
30	2	25	1	1	2	1	8	DISABLE	6		1			1	1					2		100000								3		2		1	2	2	2		1	1	1	2	2	4	2	2		2
3030	4	42	1	4	1	1	8	HAIR DRESSER	2	1		1	2	2	2			1				100000								3		3		1	1	1	2		1	1	1	2	2	3	2	1	2	1	1
262	1	11	1	2	1	4	8	MECHANIC	6	2	2									2		100000		1	2	2				3		1		4	1	1	2		1	1	1	2	2	1	2	2		2
10888	2	23	1	1	1	1	8	PHOTOGRAPHER	3	1			2		3			1		2		100000								3		1		4	2	1	2		1	1	1	2	1	3	2	1	2	1	1
134	2	25	1	1	3	1	8	TECHNICAN	3													100000								3		1		1	1		2		1	1	1	2	2	4	2	2		2
565	1	12	1	4	1	2	2		5	4		2	1	2	1				1	1	2	120000	2	6						3		1		5	1	1	2		1	1	2	2	2	2	2	1	3	1	1
203	3	34	2	5	1	4	2		6	1		1	1				1		1	1	2	120000				2				3		1		3	1	2	2		2	1	1	2	2	2	1	1	2	1	1
3352	1	12	2	4	1	2	3		3	2	2								2	1	2	120000			3	4				3		2		4	2	2	2		1	1	2	2	2	2	2	2		2
258	3	31	2	1	2	1	1		1	2	1	1	1					1		1	1	130000				4				3		1		2	1	1	2		1	1	1	2	2	4	1	1	2	1	1
258	4	42	2	1	2	1	1		1	2	1	1	1					1		1	1	130000				4				3		1		2	1	1	2		1	1	1	2	2	4	1	1	2	1	1
3003	1	11	1	2	1	6	1		1	1	1	1	2							2		150000								3		1		2	1	2	2		1	1	1	2	2	4	2	2		2
14700	1	13	2	2	2	2	1		1					3	4					2		150000				4				3		1		2	2	2	2		1	1	1	2	2	2	2	1	2	1	1
14700	2	22	2	2	2	2	1		1					3	4					2		150000				4				3		1		2	2	2	2		1	1	1	2	2	2	2	1	2	1	1
310	2	23	1	2	1	2	1		6	0	1	4	2	1	2	0	0	1	1	1	2	150000								3		1		6	1	2	2		1	1	1	2	2	3	2	2		2
11205	2	24	2	5	2	2	1		6	1		3	5	2	2	1	2	1		2		150000			2	8				3		1		5	1	1	2		1	1	1	2	2	3	2	2		2
3492	4	42	1	1	4	1	1		1	1			2	2	1				1	2		150000				2				3		3		2	2	1	2		1	1	1	2	2	3	1	1	2	1	1
349	2	21	1	3	2	1	2		6			3	2	1	1							150000								3		1		3	2	2	2		2	1	2	2	2	4	2	2		1	1
278	2	25	1	2	1	2	2		2	6	0	0	3	4	2	2	0	0	0	2		150000		2		4				3		1		6	1	1	2		1	1	2	2	2	2	2	1	4	1	1
466	4	41	1	2	1	1	2		6	1				1	1				2	1	1	150000		2	3					3		2		4	2	2	2		1	1	1	2	2	2	1	1	1	1	1
11491	3	32	1	2	2	1	3		4	1		2		3					1	1	1	150000			1	8				3				2	1	2	2		2	1	1	2	2	3	1	2		2
133	2	21	1	2	2	3	4		6				4	4						2		150000				3				3		2		4	1	1	2		1	2	1	2	2	1	2	2		2
12177	3	33	1	5	2	1	4		1	2	1	2	0	1	1	0	0	0	0	1	2	150000								3		1		2	2	2	2		2	1	1	2	2	3	2	1	1	1	1
3111	1	12	1	2	1	1	8	CAPENTER	2	2	1	2								2		150000								3		1		2	1	1	2		1	1	1	2	2	3	2	1	1	1	1
3338	1	11	2	2	2	1	1		2	2	1	1	2							1	1	170000	1	1	2	2				3				4	1	1	2		1	1	1	1	2	1	1	1	1	1	1
3356	1	12	1	3	2	2	3		6	1	1	1	2							2		170000		2	3					3		2		6	1	1	2		1	1	1	2	2	2	2	2		2
27	1	13	2	1	2	5	1		2		1								1	1	1	200000				5				3		1		4	1	2	2		1	1	1	2	2	5	2	2		2
195	1	13	2	1	1	1	1		2	1		1		1						2		200000								3		1		5	2	2	2		2	1	1	2	1	4	2	2		2
1061	2	21	1	2	1	1	1		6			2	1							1	2	200000		3	4	7				3		1		3	1	1	2		1	1	1	2	2	4	2	1	1	1	1
370	2	21	2	2	2	1	1		6	1			3	1	1					1	2	200000				4				3		1		5	2	2	2		1	1	1	2	2	4	2	1	1	1	1
348	2	21	2	3	2	4	1		6					5	4							200000								3		1		3	2	2	2		2	2	2	2	2	4	2	2
352	2	21	2	3	2	4	1		6				6	2			1					200000				4				3		1		8	2	2	2		2	1	2	2	2	4	2	2		2
508	2	21	2	3	2	2	1		6			1	2	1	1		1			2		200000								3		1		3	2	2	2		2	1	2	2	2	2	2	1	2	1	1
615	2	21	2	1	2	1	1		6	1	1	2	1	3	1			0	1	1	2	200000								3		1		2	1	2	2		2	1	1	2	2	2	2	2		2
388	2	22	1	4	1	2	1		6	2	1	2	21		2			0	0	2		200000				7				3		1		3	2	2	2		1	1	2	2	2	2	2	1	2	1	1
302	2	22	2	2	2	1	1		6	1		1		1		1			1	1	1	200000			3	4				3		1		3	2	2	2		1	1	1	2	2	2	1	1	3	1	1
52	2	23	2	4	2	2	1		6	1	1	2	1	1						2		200000		2	3	4				3		1		3	1	1	2		1	1	1	2	2	3	2	2		2
5113	2	23	1	2	1	3	1		3	5	5	1	4							2		200000				4				3		1		9	1	1	2		1	1	1	2	2	4	2	2		2
11202	2	24	2	4	2	2	1		1		1	2	1	1	4	1	1		1	1	2	200000		2	4	15				3		1		5	1	1	2		1	1	1	2	2	3	2	2		2
248	2	25	1	1	1	2	1		3	1	1			1	2				2		1	200000				4				3		1		4	1	2	2		1	1	1	1	1	1	2	1	3	1	1
135	2	25	1	2	2	2	1		2	1		2	2		2					1	2	200000		2	3	3				3		1		4	1	1	2		1	1	2	2	2	4	2	2		2
9072	4	41	2	1	2	5	1		2		1								1	1	1	200000				5				3		1		4	1	2	2		1	1	1	2	2	5	2	2		2
3069	4	42	1	4	1	1	1		6	1	3	1	1	2						2		200000			3	4				3		1		4	2	2	2		2	1	1	2	2	2	2	1	2	2
52	4	42	2	4	2	2	1		6	1	1	2	1	1						2		200000		2	3	4				3		1		3	1	1	2		1	1	1	2	2	3	2	2		2
5113	4	42	1	2	1	3	1		3	5	5	1	4							2		200000				4				3		1		9	1	1	2		1	1	1	2	2	4	2	2		2
225	1	11	1	2	1	2	2		6		2	2		1	2			2		1	1	200000								3		1		3	1	2	2		2	2	1	2	2	3	2	2		2	2
10366	1	11	2	2	1	2	2		6	1		1	2					1		1	1	200000				4				3		1		2	1	2	2		1	2	2	2	2	3	1	1	1	1	1
10365	1	11	2	1	2	1	2		6	1	1								2	1	2	200000				4				3		1		2	1	2	2		2	2	2	2	2	3	2	1	2	1
10349	1	11	2	2	1	4	2		6				2	1						2		200000				4				3		1		1	1	2	2		2	1	2	2	2	3	2	1	1	1	1
130	2	21	2	1	2	2	2		6		1			3	2				2	1	2	200000				4				3		1		6	1	1	2		2	1	1	2	2	3	2	1	2	2
93	2	21	1	2	2	1	2		6			3	3	1	1					2	2	200000		2	5					3		1		5	1	2	2		2	1	1	2	2	4	2	2		1	1
14036	2	21	2	2	2	1	2		6	1	1		1	1	2				1	1	2	200000				2				3		1		2	1	2	2		2	1	2	2	2	3	2	2		1	1
250	2	21	1	2	1	1	2		6		1	2	3	1	2					2		200000		3	3	5				3		3	ZINC	4	1	1	2		1	1	1	2	2	4	2	2		1	1
342	2	21	1	4	1	1	2		6					4	4	1	1					200000				4				3		1		4	2		2		1	1	1	2	2	4	2	1		1
366	2	21	2	2	2	1	2		6	1			1	1								200000				4				3		1		3	2	2	2		2	1	2	2	2	4	2	2
356	2	21	2	4	2	4	2		6			1	2		1							200000								3		1		1	2	2	2		2	1	2	2	2	4	2	2
334	2	21	1	3	1	1	2		6	1			3	2								200000								3		2		3	2	2	2		1	1	2	2	2	4	2	1	2	1	1
472	2	21	1	1	1	1	2		3	1			2	1	1	1		1	0	1	2	200000								3		1		3	1	2	2		2	1	1	2	2	2	1	1	1	2	1
519	2	25	2	2	2	1	2		6	2	3	1	2	3	3	2	3	0	0	1	2	200000								3		2		4	1		2		2	1	2	2	2	3	2	2		2
264	2	25	1	2	2	2	2		1	0	1	3	2	2	3	0	0	0	1	1	1	200000			2	4				3		1		6	1	1	2		1	1	1	2	2	3	1	1	1	2
439	2	25	1	3	2	1	2		6	1				1	1					1	2	200000								3		1		4	1	2	2		2	2	2	2	2	2	1	1	1	1	1
440	2	25	1	2	1	6	2		6					2	2	2				1	2	200000			3					3		1		4	1	1	2		1	1	1	2	2	4	2	2		2
10483	2	25	1	2	1	1	2		6	1		2	1	2						2		200000				4				3		1		4	1	2	2		2	1	1	1	2	2	2	2		2
242	3	31	1	1	1	1	2		6			1	2	1	4	1			1	1	1	200000				4				3		2		4	1	2	2		1	1	2	2	2	3	2	1	1	1	1
256	3	31	1	2	1	1	2		6		1	1	2	2	1				1	1	1	200000								3		1		3	1	2	2		1	1	1	2	2	4	2	2		2
3069	3	31	1	4	1	1	2		6	1	3	1	1	2						2		200000			3	4				3		1		4	2	2	2		2	1	1	2	2	2	2	1	2	2
381	3	32	2	5	1	4	2		2		2	3	2		4			0	1	1	1	200000		3	10		4			3		1		4	1	1	2		1	1	2	2	2	3	2	2	4	1	2
10623	3	32	1	5	1	1	2		6				2	3	3					2		200000				8				3		1		2	2	2	2		1	2	2	2	2	2	2	1	1	2
10622	3	32	1	3	1	1	2		4				2		3					1	2	200000			1	4				3		2		3	2	1	2		1	1	1	2	2	3	2	1	1	2
11383	3	32	2	4	2	1	2		6		1		2	3						1	2	200000			1	3				3		2		3	2	1	2		2	1	1	2	2	3	2	1		2
11495	3	32	1	2	1	1	2		6				2		3				1	1	2	200000			3	2				3		1		4	2	1	2		1	1	2	2	2	4	2	1	1	2
11488	3	32	2	2	2	1	2		6		1		2	3					1	1	2	200000		2		3				3		2		2	2	2	2		2	1	1	2	2	3	2	1		2
11021	2	24	1	4	1	2	3		3	0	1	0	4	4	1	0	0	0	1	1	1	200000	0	4	2	3	0			3		1		3	1	1	2		1	1	1	2	2	2	1	1	1	1	1
11021	3	31	1	4	1	2	3		3	0	1	0	4	4	1	0	0	0	1	1	1	200000	0	4	2	3	0			3		1		3	1	1	2		1	1	1	2	2	2	1	1	1	1	1
11021	3	33	1	4	1	2	3		3	0	1	0	4	4	1	0	0	0	1	1	1	200000	0	4	2	3	0			3		1		3	1	1	2		1	1	1	2	2	2	1	1	1	1	1
313	2	23	1	2	1	1	4		1	2	1	2	1	1	1	1				2		200000			3					3		1		3	1	2	2		1	1	1	2	2	4	2	1	1	1	1
12177	2	24	1	5	2	1	4		1	2	1	2	0	1	1	0	0	0	0	1	2	200000		2	3	1	1			3		1		2	2	2	2		2	1	1	2	2	3	2	1	1	1	1
313	4	42	1	2	1	1	4		1	2	1	2	1	1	1	1				2		200000			3					3		1		3	1	2	2		1	1	1	2	2	4	2	1	1	1	1
603	4	41	1	2	1	1	5		3			1						1		1	1	200000								3		1		2	1	1	2		1	1	1	2	1	4	2	2		1	1
117	4	41	1	1	1	1	5		2	1	2	1		2	2	1	1			2	2	200000				4				3		1		4	1	1	2		2	1	2	2	1	4	2	2		2
70	2	23	1	2	1	2	6		6	1	1	1	2							2		200000								3		1		2	1	2	2		1	1	2	1	2	4	2	2		2
70	4	42	1	2	1	2	6		6	1	1	1	2							2		200000								3		1		2	1	2	2		1	1	2	1	2	4	2	2		2
39	1	13	1	1	1	5	7		3		1			1	1					1	1	200000				12				3		1		3	1	2	2		1	1	1	2	2	5	2	1	2	1	1
9087	4	41	1	1	1	5	7		3		1			1	1					1	1	200000				12				3		1		3	1	2	2		1	1	1	2	2	5	2	1	2	1	1
116	4	42	1	1	1	1	7		3	1	1	5	5	6	7					2	2	200000				4				3		1		10	1	1	2		1	1	1			2	2	2		2
108	2	21	2	2		1	2		6	1	2	3	2							2		200000				4				3		1		3	1	1	2		1	1	1	2	2	4	2			2
108	4	42	2	2		1	4		6	1	2	3	2							2		200000				4				3		1		3	1	1	2		1	1	1	2	2	4	2			2
4009	1	12	1	2	1	2	8	BOAT OWNER	6	2	2	2	2	1					1	1	1	200000		2	3	4				3		1		5	1	1	2		1	1	1	2	2	3	1	1	2	1	1
3306	1	11	1	2	1	1	8	DISABLE	4	2										2		200000		2						3		1		3	1	2	2		1	1	1	2	2	2	1	1	1	2
22	2	25	1	2	2	1	8	DISABLE	6	1	1		1		2				2	1	2	200000								3		1		3	2		2		2	1	2	2	2	4	1	2		2
205	1	11	1	2	1	1	8	MASON				1	4							1	2	200000				1				3		1		3	1	1	2		1	1	1	2	2	3	2	1		1	2
1515	4	42	1	2	1	1	8	STONE MINER	1		1		1	1	1				1	1	1	200000								3		1			1	2	2		1	1	1	2	2	3	2	2
5067	1	11	1	2	1	1	1		1	1	1	1	2							2		250000				3				3		1		4	1	2	2		1	1	1	2	2	3	2	1	1	1	1
4032	1	12	1	1	1	6	1		3											2		250000								3		1		2	2	2	2		1	1	1	1	2	4	2	2		2
10645	3	32	2	5	1	4	1		6			2	2						1	1	2	250000			3	4				3		2		2	1	1	2		1	1	1	2	2	4	2	2		2
681	4	41	2	2	2	2	1		1			2	2	2	2			1		2		250000		2		4				3		1		4	1	1	2		1	1	1	2	2	2	2	1	4	1	1
3056	4	42	1	2	1	1	1		4			1	2	1	2					2		250000								3		3		3	1	1	2		1	1	1	2	2	3	2	1	2	1	1
471	2	21	1	3	1	2	2		6	1		1	1	2	3			0	0	1	2	250000		2						3		1		6	2	2	2		1	1	1	2	2	2	2	1	1	1	1
426	2	25	1	3	1	2	2		6	1	2	3		4	2	1	2			1	2	250000		2	3					3	`	1		6	1	2	2		1	1	1	2	2	3	1	1	1	1	1
467	2	25	1	2	1	2	2		6	1	1	3	1	1	2					2		250000		2	3					3		1		5	1	1	2		1	1	1	2	2	3	2	1	2	1	1
701	4	41	2	3	1	4	2		6	0	0	2	1	0	0	0	0			2		250000				10				3		2		2	2	1	2		2	1	1	2	2	3	1	1	2	1	1
1032	3	31	1	2	1	6	5		2	1	2	1	1							2		250000		2		4				3		1		2	1	2	2		1	1	1	2	2	1	2	1	2	1	1
1032	4	42	1	2	1	6	5		2	1	2	1	1							2		250000		2		4				3		1		2	1	2	2		1	1	1	2	2	1	2	1	2	1	1
143	2	21	1	2	1	1	6		2	1	2								1	2		250000		2		4				3		1		4	1	1	2		2	1	1	2	2	2	2	1	1	1	1
145	2	21	1	2	1	1	6		2	1	2	3							1	1	2	250000		2		4				3		1		3	2	1	2		1	1	1	2	2	4	2	2		2
143	4	42	1	2	1	1	6		2	1	2								1	2		250000		2		4				3		1		4	1	1	2		2	1	1	2	2	2	2	1	1	1	1
145	4	42	1	2	1	1	6		2	1	2	3							1	1	2	250000		2		4				3		1		3	2	1	2		1	1	1	2	2	4	2	2		2
276	2	25	1	1	1	5	7		3	0	0	0	0	1	0	0	0	2	2	2		250000								3		1		1	2	2	2		1	1	1	2	2	4	2	2		2
3490	4	42	2	1	1		7		3				2	1	2							250000				6				3		3	ZINC	2	1	1	2		1	1	1	2	1	3	2	2		2
181	3	31	1	2	1	1	8	CARPENTER	6		2	3		2	3			1	2	1	1	250000		2	2					3		2		3		2	2		1	1	2	2	2	2	2	1	3	1	1
10485	2	25	1	3	4	4	2		6			4	1	2	3					2		300000				4				3		1		4	1	1	2		2	1	1	2	2	3	2	1	1	1	1
256	3	31	2	1	2		2											1	3	1	1	300000								3		1		3	1	2	2		1	1	1	2	2	2	2	1	1	1	1
26	1	11	1	2	1	1	1		6	0	0	0	0	0	1	2	0	1		1	2	300000				4				3		1		3	1	2	2		1	1	1	2	2	5	2	2		2
6258	1	11	1	2	2	1	1		1	5	7									2		300000				4				3		1		7	1	1	2		1	1	2	2	2	2	2	2		2
3120	1	12	1	2	1	1	1		1	1	2	1	1	1	1					1	2	300000			3					3		1		3	1	1	2		1	1	1	2	2	3	1	1	2	1	1
11	1	13	2	1	1	1	1		2	1			2	1	1				2	1	1	300000								3		1		1	1	2	2			2	1		2	5	2	1	1	1	1
165	1	13	1	2	1	4	1		1	1	1	1							2	1	2	300000				4				3		1		2	1	2	2		2	1	1	2	2	4	2	2		2
346	2	21	2	3	4	1	1		6					3	2							300000		2		4				3		1		6	2	2	2		1	1	2	2	2	4	2	2
336	2	21	2	4	2	3	1		6					3	1		1					300000		1		4				3		1		5	2	2	2		2	1	1	2	2	4	2	2
363	2	21	2	3	2	1	1		6			1	1	3				1		1	2	300000				4				3		1		2	2	2	2		1	1	2	2	2	4	2	2
350	2	21	1	5	2	4	1		6					3	2		1					300000				4				3		1		4	2	2	2		2	1	2	2	2	2	2	1	1	1	1
51	2	23	1	2	2	2	1		3	1	1	1							1	1	2	300000				4				3		1		4	1	1	2		1	1	2	2	2	4	2	2		2
11039	2	24	2	1	2	1	1		5	0	1	4	1	1	1	0	0	0	0		2	300000	0	1	2	3				3		1		3	2	1	2		1	1	1	2	2	2	1	1	2	1	1
11278	2	24	2	2	2	1	1		1	1		1	2	1	1				1	1	2	300000		2	1	4				3		1		2	1	2	2		1	1	1	2	2	3	2	2		2
11189	2	24	2	3	2	2	1		1	1	2	3	2	3	4		1		1	2		300000				4				4	PIT HOLE	1		5	1	1	2		1	1	1	2	2	3	1	2		2
11178	2	24	2	3	2	2	1		2			1	1	2	2					2		300000		2	1	8				3		1		3	1	1	2		1	1	1	2	1	3	2	1		1	1
549	2	25	2	4	1	4	1		6	0	0	0	0	1	2	0	0			2		300000								3		1		4	2	2	2		1	1	1	2	2	3	2	2			2
554	2	25	2	2	1	2	1		1	0	0	0	3	2	2	0	1	0	0	2		300000								3		1		3	2	2	2		1	1	1	2	2	3	2	2
181	2	25	1	2	1	1	1		6	1	1	2	3	1	1	0	0	0	0	2		300000		2	3	4				3		1		9	1	1	2		1	1	1	2	2	1	1	1	3	1	1
11039	3	31	2	1	2	1	1		5	0	1	4	1	1	1	0	0	0	0		2	300000	0	1	2	3				3		1		3	2	1	2		1	1	1	2	2	2	1	1	2	1	1
4352	3	31	2	1	1	5	1		1	1										1	2	300000				4				3		2		1	1	2	2		1	1	2	2	2	4	2	2		1
11039	3	33	2	1	2	1	1		5	0	1	4	1	1	1	0	0	0	0		2	300000	0	1	2	3				3		1		3	2	1	2		1	1	1	2	2	2	1	1	2	1	1
1203	4	41	2	3	2	1	1		2	5	0	1	3	5	1	2	0	0	0	1	1	300000					8			3		1		6	1	2	2		2	1	1	2	2	3	2	2		2
9085	4	41	2	1	1	1	1		2	1			2	1	1				2	1	1	300000								3		1		1	1	2	2			2	1		2	5	2	1	1	1	1
1084	4	42	2	1	2	1	1		6			1		1	1					2		300000								3		1		1	2	2	2		2	1	2	2	2	2	2	2		2	2
499	4	42	1	3	2	1	1		6	3	3	3	44	3	3			2	1	1	2	300000								3		1		7	1		2		2	1	1	2	2	3	2	2
3440	4	42	1	2	1	1	1		2	0	0	10	0	10	0	0	0	0	0			300000								3		3		3	1	2	2		1	1	2	2	2	3	1	1	2	1	1
1460	4	42	1	2	1	4	1		6	0	2	1	0	0	0	0	0			2		300000								3		2		1	2	2	2		1	1	2	2	2	3	2	1	1	1	1
4091	4	42	1	3	1	1	1		6	1	2	1	1	1	1					1	2	300000				4				3		1		3	1	2	2		1	1	1	2	2	2	2	1	1	1	1
4352	4	42	2	1	1	5	1		1	1										1	2	300000				4				3		2		1	1	2	2		1	1	2	2	2	4	2	2		1
51	4	42	1	2	2	2	1		3	1	1	1							1	1	2	300000				4				3		1		4	1	1	2		1	1	2	2	2	4	2	2		2
511	1	11	1	4	1	2	2		6	1	2	4	6	2	2	0	0	2	1	2		300000				4				3		2		4	1	2	2		2	1	1	2	2	4	2	2		2
207	1	11	1	4	1	2	2		6		1	2	2	1						1	1	300000				4				3		1		4	2	2	2		1	2	2	2	2	3	2	1	2	1	1
10329	1	11	2	2	1	4	2		6			3	4					1		1	1	300000				4				3		1		4	2	2	2		2	2	2	2	2	3	2	1	2	1	1
10362	1	11	1	2	1	1	2		6	1	1		1						2	1	1	300000				4				3		1		1	1	1	2		2	1	2	2	2	3	2	1	1	1	1
10357	1	11	1	2	1	1	2		6	1		2	1					1		1	2	300000				4				3		1		4	1	2	2		1	1	2	2	2	3	2	1	1	1	1
10350	1	11	1	3	1	2	2		4			6	3		2			1	1	1	2	300000				4				3		1		4	1	2	2		2	1	2	2	2	3	2	2		1	1
397	1	11	1	3	1	2	2		1	1			2	3				1		1	1	300000				4				3		1		5	1	1	2		1	1	1	2	2	2	1	1	2	1	1
9	2	21	1	1	1	1	2		2		1	3			1	1		1		1	2	300000			1	3				3		1		6	1		2		1	1	1	2	2	4	1	1	2	1	1
379	2	21	2	5	2	4	2					2			3		1					300000								3		2		1	2	2	2		2	2	2	2	2	4	2	2
355	2	21	2	2	2	1	2		6		1		2	4	1				2	1	2	300000				4				3		1		1	1	2	2		2	2	2	2	2	4	2	2
361	2	21	2	4	2	1	2		6		1	2		1	1					1	2	300000				4				3		1		2	2	2	2		2	2	2	2	2	4	2	1	1	1	1
548	2	25	2	4	2	1	2		6	0	0	2	0	2	2	0	0	1		2		300000								3		1		4	1	2	2		1	1	1	2	2	3	2	2		2
228	2	25	1	2	1	2	2		1	1	1	2	3	3	2	0	0	2	2	1	1	300000		2	4					3		1		9	1	1	2		1	1	1	2	2	1	1	1	3	1	1
149	2	25	1	2	1	2	2		6	2	2	2	0	1	2	0	0	1	2	2		300000								3		1		3	1	2	2		2	2	1	2	2	3	2	2		2
238	2	25	1	2	1	2	2		6		2	2	1	2					2	1	1	300000								3		1		3	1	2	2		2	2	1	2	2	3	2	2		2
186	2	25	1	2	1	2	2		6	1	1	2	3	3	2				2	1	1	300000		2	3					3		1		9	1	1	2		1	1	1	2	2		1	1	3	1
10490	2	25	1	1	1	2	2		6	2	1	1	33	3	2				2	1	2	300000			3					3		1		4	1	1	2		2	1	1	2	2	3	2	2		2
208	3	31	1	2	1	1	2		6			2	1	1	1					2		300000			3	4				3		2		2	1	2	2		1	1	1	2	2	3	2	2
248	3	31	1	3	1	1	2		2			2	1	1	1					2		300000		2						3		2		2	1	2	2		1	1	2	2	2	2	2	2		2
4091	3	31	1	3	1	1	2		6	1	2	1	1	1	1					1	2	300000				4				3		1		3	1	2	2		1	1	1	2	2	2	2	1	1	1	1
2022	3	31	1	2	1	1	2		6	4	1	3	1							1	2	300000				4				3		2		3	1	2	2		2	2	1	1	1	2	1	1	2	1	1
444	3	33	2	2	2	1	2		6		1	1	2	1	2					2		300000				4				3		1		4	1	1	2		2	1	1	2	2	3	2	1	1	1	1
10755	4	42	2	3	2	1	2		6			3		1				1	1	2		300000		3	5	10				3		2		4	2	1	2		1	2	2	2	2	4	1	1	2	1	1
199	1	13	2	1	2	1	4		1			2	1	1						1	1	300000								3		1		4	2	2	2		2	1	2	2	2	3	1	2		2
544	2	25	1	1	3	5	4		3	0	0	2	0	1	1	0	0	2	2	2		300000								3		1		3	2	2	2		1	1	1	2	2	3	2	2		2
227	3	31	1	3	1	1	4		1		2	1		2	1				1	2		300000			3	4				3		2		2	1	2	2		1	1	1	2	2	3	2	1	1	1	1
76	1	13	1	2	1	2	5		1	1		1	1	1	1					1	1	300000		2	1	4				3		1		2	1	1	2		1	1	1	2	2	5	1	1	1	1	1
314	2	21	1	1	1	1	5		3			1	2	1	1							300000				4				3		1		1	2	2	2		1	1	2	2	2	2	2	1	2	1	1
3106	3	31	1	1	1	5	5		6		2											300000								3		1		1	1	1	2		1	1	1	1	2	5	2	1	1	1	1
1007	4	41	1	2	1	2	5		1	1		1	1	1	1					1	1	300000		2	1	4				3		1		2	1	1	2		1	1	1	2	2	5	1	1	1	1	1
3106	4	42	1	1	1	5	5		6		2											300000								3		1		1	1	1	2		1	1	1	1	2	5	2	1	1	1	1
171	2	21	1	3	1	2	6		2	1	2	1	1	3								300000		2	3					3		1		3	1	1	2		1	1	1	2	2	2		1	1	1	1
141	2	21	1	3	1	1	6		1	1	1	1	2	3					2	1	2	300000		2		4				3		1		3	1	1	2		1	1	1	2	1	2	1	1	1	1	1
171	4	42	1	3	1	2	6		2	1	2	1	1	3								300000		2	3					3		1		3	1	1	2		1	1	1	2	2	2		1	1	1	1
141	4	42	1	3	1	1	6		1	1	1	1	2	3					2	1	2	300000								3		1		3	1	1	2		1	1	1	2	1	2	1	1	1	1	1
6	4	42	1	3	1	2	6		6				1	3				1		1	2	300000		3	1	6				3		1		3	1	1	2		1	1	1	1	2	4	2
10367	1	11	1	1	1	5	7		3					1				1		1	2	300000								3		1		3	1	2	2		1	1	2	2	2	3	2	1	1	1	1
154	2	25	1	2	1	2	2		6	1	1	2	3	3	2	0	0	2	2	1	1	300000								3		2		9	1	2	2		1	1	1	2	2	1	1	1	3	1	1
4166	3	31	1	3	1	1	8	ATAYA BASE	4	1	1	1								2		300000	1	2						3		1		4	1	1	2		1	1	1	1	2	2	2	1	1	1	1
4166	4	42	1	3	1	1	8	ATAYA BASE	4	1	1	1								2		300000	1	2						3		1		4	1	1	2		1	1	1	1	2	2	2	1	1	1	1
11184	2	24	2	3	1	4	8	HAIR DRESSER	3	1		2		1	2					2		300000		1	1	3				3		1		2	1	1	2		1	1	1	2	2	3	2	2		2
11582	1	11	1	2	1	2	8	SAND MINING	1			2		1	2			1	2	1	1	300000				4				3		1		6	1	1	2		1	1	1	2	2	3	1	1	1	1	1
213	3	31	1	1	1	1	8	STONE MINER	6	1	1	1	2	2	2				2	1	1	300000				4				3		2		3	2	2	2		1	1	2	2	2	3	2	2
3002	1	11	1	3	1	1	1		6	1	2	1	1	1	2					2		350000				4				3		1		4	1	2	2		1	1	1	2	2	4	2	1	2	1	1
991	4	41	2	2	2	1	1		1			1	1	1	1					1	1	350000								3		1		2	2	2	2		1	1	1	2	2	4	2	1		1	1
986	4	42	2	2	1	6	1		1			1	1		2					1	1	350000								3		1		2	2	2	2		1	1	1	2	2	1	2	1	2	1	1
1023	4	42	2	2	2	1	1		1			1	1	1	1					1	1	350000								3		1		2	2	2	2		1	1	1	2	2	4	2	1		1	1
131	3	31	1	2	1	5	6		2	1	2	1	3									350000		2		4				3		1		3	1	1	2		1	1	1	2	2	4	2				2
131	4	42	1	2	1	5	6		2	1	2	1	3									350000		2		4				3		1		3	1	1	2		1	1	1	2	2	4	2				2
10983	2	24	1	1	1	1	8	BIKE MECHANIC	6			1	1	1	2			1		1	1	350000								3			ZINC	4	1	2	2		1	1	1	2	2	3	2	2		2
5041	1	11	1	5	1	1	1		6	1	1	1	1						1	1	2	400000		2		1	2			3		1		6	1	2	2		1	2	2	2	2	3	1	1	4	1	1
11289	2	24	1	5	1	2	1		6	1	1	2	4	1	3	1	2		1	1	2	400000	1	1	1	5				3		1		3	1	1	2		1	1	1	2	2	3	2	2		2
11195	2	24	2	4	2	1	1		6	1		2	3	2	2					2		400000			2	10				3		1		3	1	1	2		1	1	1	2	2	3	2	2		2
11134	2	24	2	3	2	1	1		2	1		2	3	2	1	1				1	2	400000		2						3		1		4	1	1	2		1	1	1	2	2	4	1	1	3	1	1
1011	3	31	2	2	2	1	1		2	2	2	1								2		400000			3	4				3		1		3	2	2	2		1	1	2	2	2	2	2	1	2	1	1
1011	4	42	2	2	2	1	1		2	2	2	1								2		400000			3	4				3		1		3	2	2	2		1	1	2	2	2	2	2	1	2	1	1
3370	4	42	1	2	2	4	1		2										2	1	1	400000								3		2		3	1	1	2		1	1	1	2	2	2	2	2		2
307	1	11	2	4	1	4	2		6	1	1	2	2	4	1				2	2		400000								3		1		4	2	2	2		1	1	1	2	2	3	2	1	3	1	1
11092	1	12	1	3	1	2	2		6			6	4							2		400000			3					3		2		5	1	1	2		1	1	1	2	1	4	1	1	1	1	1
14033	1	12	2	3	2	1	2		1	1			2	1	1					1	1	400000		1	1					3		3	ZINC	6	1	1	2		2	2	2	2	2	3	2	1	1	1	1
3370	1	13	1	2	2	4	2		2	1	1	1	1						2	1	1	400000		2						3		2		3	1	1	2		1	1	1	2	2	2	2	2		2
393	2	21	2	2	2	2	2		6	1			1	1	1				2	1	2	400000				4				3		1		2	2	2	2		1	1	1	2	2	4	2	1	1	1	1
368	2	21	2	3	4	1	2		6			2			3	1	1					400000								3		1		4	2	2	2		1	1	2	2	2	4	2	1	1	1	1
509	2	21	2	3	1	2	2		6	1	1	1		1	2				1	1	2	400000								3		2		4	1	2	2		2	1	1	2	2	2	1	1	2	1	1
577	2	22	1	3	1	2	2		6	3	1	0	0	0	0	0	0	0	1	2		400000				6				3		1		5	2	2	2		1		1			2	1	1	2	1	1
506	2	22	1	3	1	2	2		6	3	2	4	5	2	3	0	0	2		1	2	400000		2	3					3		1		7	1	1	2		2	1	1	2	2	3	2	1	2	2
504	2	22	2	2	1	4	2		2	0	0	0	0	3	3	0	0	2	2	2		400000		2	3	4				3		2		2	1	1	2		2	2	1	2	2	2	2	2		2
389	2	22	2	2	2	1	2		2		2	1	4	1	2			0	0	2		400000								3		2		4	1	2	2		1	1	2	2	2	2	2	1	1	1	2
331	2	23	2	3	2	1	2		6	1	0	0	3	2	1	0	0	1	0	1	2	400000		2	4	12				3		1		4	2	1	2		1	1	1	2	2	1	2	1	1	1	1
335	2	23	2	4	2	2	2		6	1	0	0	2	2	3	0	0	0	1	2		400000		2	4	2				3		1		4	2	2	2		1	1	1	2	2	1	2	1	2	1	2
245	2	23	1	2	2	1	2		6	1	1	2	2	3	3					1	2	400000								3		1		4	1	2	2		1	1	1	2	2	3	2	1	1	1	1
247	2	23	2	2	1	3	2		6	1	1	2			3					1	2	400000								3		1		4	1	1	2		1	1	1	2	2	3	2	1	1	1	1
249	2	23	1	1	1	1	2		6		1	2	2		3				2	1	2	400000								3		1		5	1	1	2		1	1	1	2	2	3	2	1	1	1	1
256	2	23	1	1	1	3	2		6	1		2	2	3	3				1	1	2	400000								3		1		4	1	1	2		1	1	1	2	2	3	2	1	1	1	1
258	2	23	1	1	1	4	2		6	1		2	2	3	3				1	1	2	400000								3		1		5	1		2		1	1	1	2	2	3	2	1	1	1	1
10875	2	23	1	2	1	1	2		2	1	1	2	2	3					1	1	2	400000								3		1		4	1	1	2		1	1	1	2	2	3	2	1	1	1	1
10865	2	23	1	1	1	1	2		3	1		2	2	3					2	1	2	400000								3		1		5	1	1	2		1	1	1	2	1	3	2	1		1	1
12260	2	24	2	4	2	4	2		6		2	1	3	1				0	0	2		400000								3		2		3	2	2	2		2	1	2	2	2	2	1	1	2	1	2
156	2	25	1	2	1	2	2		6	1	1	2	3	3	2	0	0	2	2	1	1	400000	4	12	13	8				3		1		9	1	1	2		1	1	1	2	2	1	1	1	3	1	1
157	2	25	1	2	1	2	2		6	1	1	2	3	3	2	0	0	0	2	1	1	400000		2	3	8				3		1		9	1	1	2		1	1	1	2	2	1	1	1	3	1	1
429	2	25	2	2	2	1	2		6	1	1	1	2	1	1				2	1	2	400000			3					3		1		3	2	2	2		2	1	1	2	2	2	2	1	2	1	1
10590	2	25	1	3	1	1	2		5			3	2	1	3	1				2		400000			3	4				3		1		8	1	1	2		1	1	1	2	2	3	2	2			2
216	3	31	1	3	1	2	2		2	1	4	2	4	4	4			1	2	1	1	400000		2	3	4				3		1		2	1	1	2			1	1	1	2	2	2	1	3	1	1
952	3	31	1	2	1	2	2		2	2	1	2	1					1	2	1	2	400000			3	4				3		1		3	1	2	2		1	1	1	2	2	2	2	1	1	1	1
11492	3	32	1	4	1	1	2		4		2	2			3					1	1	400000			1	3				3		1		3	2	2	2		1	1	1	2	2	1	2	2		2
12060	3	33	2	5	2	4	2		6	0	0	2	2	2	2	1	0	0	1	1	1	400000	0	0	0	0	0			3		1		5	1	2	2		2	2	2	2	2	1	1	1	2	2
12260	3	33	2	4	2	4	2		6		2	1	3	1				0	0	2		400000								3		2		3	2	2	2		2	1	2	2	2	2	1	1	2	1	2
216	4	42	1	3	1	2	2		2	1	4	2	4	4	4			1	2	1	1	400000		2	3	4				3		1		2	1	1	2			1	1	1	2	2	2	1	3	1	1
2854	4	42	2	3	2	1	2		1	1			2	1	1					1	1	400000								3		3	ZINC	6	1	1	2		2	2	2	2	2	3	2	1	1	1	1
182	2	25	1	2	1	2	3		6	1	1	2	3	3	2				2	1	1	400000		2	3					3		1		9	1	1	2		1	1	1	2	2	1	1	1	3	1	1
11471	3	32	1	3	1	1	3		6		1		2		3					1	1	400000		1		3				3		2		3	2	2	2		1	1	1	2	2		1	1	1	1	1
10489	4	42	1	2	1	1	3		1			3	1							2		400000				11				3		2		2	1	2	2		2	1	2	2	2	3	2	1		1	1
10337	1	11	1	2	1	1	4		6			1	2							2		400000								3		1		3	1	2	2		1	1	1	2	2	4	1	1	2	1	1
1205	4	41	1	2	3	2	4		2	6	2			1	3	2				2		400000				4				3		2		3	1	2	2		2	1	1	2	2	2	2	2		2
1098	2	21	1	1	3	5	5		2	1	0	3	0	2	1				1	2		400000		2	3	12				3		1		3	1	1	2		1	1	1	2	1	4	2	2		2
307	2	21	1	2	1	1	5		1			1	1	1	1							400000				4				3		1		1	2	2	2		1	1	2	2	1	2	2	1	2	1	1
11199	2	24	1	2	3	1	5		2	2	1	3	2	3	4	1	1		1	1	2	400000			1	4				3		1		4	1	2	2		1	1	1	2	1	3	2	2		2
12079	2	25	1	1	1	2	5		2	3	0	0	0	1	1	0	0	1	1	1	1	400000	0	0	1	3				3		1		3	1	2	2		1	1	2	2	1	2	2	1	3	1	1
11480	3	32	1	2	1	1	5		6	1	1	2	2						1	1	1	400000				8				3		1		2	2	2	2		1	1	1	2	1	4	2	1	2	2
10314	2	24	1	1	1	1	6		1					1	1			1		1	1	400000								3		1		1	2	2	2		2	1	2	1	2	4	2	2		2
4146	3	31	1	4	1	2	6		6	1	3	1	2	3				2				400000	1	2		4				3		1		6	1	1	2		1	1	1	1	2	2	2	1	2	1	1
4146	4	42	1	4	1	2	6		6	1	3	1	2	3				2				400000	1	2		4				3		1		6	1	1	2		1	1	1	1	2	2	2	1	2	1	1
79	2	21	1	1	1	5	7		3					1						2		400000								3		1		6	1	2	2		2	1	1	2	2	4	2	2		2
193	2	25	1	2	1	2	2		6	1	1	2	3	3	2			2	1	1	1	400000		2	3					3		1		1	1	1	2		1	1	1	2	2	1	1	1	3	1	1
183	2	25	1	2	1	2	2		6	1	1	2	3	3	2				2	1	1	400000		2	3	4				3		1		4	1	1	2		1	1	1	2	2	1	1	1	3	1
232	3	31	1	3	1	1	8	CARPENTER	6		2	1	2	1	1			1	2	2		400000			3	4				3		2		2	1	2	2		1	1	1	2	2	4	2	2
3026	4	42	2	2	2	1	8	CARPENTER	6		1			1	1				2	1	1	400000								3		3		6	1	1	2		1	1	1	2	2	3	2	1	1	1	1
998	4	42	2	3	1	6	1		6			2	1		1					1	2	450000				2				3		1		2	2	2	2		2	1	1	2	2	4	2	1	1	1	1
356	2	24	2	2	1	1	1		6	0	0	2	0	1	2	0	0	0	0	2		480000								3		1		2	1	2	2		1	1	2	2	2	2	2	1	2	1	1
383	2	21	1	3	1	1	2		2	1	3	4		1	2			0	0	2		480000								3		1		3	2	2	2		1	1	1	2	2	4	2	2	1	1	1
3346	1	11	2	2	1	1	1		1	2										1	2	500000								3		1		5	1	1	2		1	2	2	2	2	1	2	2		2
11662	1	11	2	4	1	4	1		6			1	2	2	1					2		500000				4				3		1		3	2	2	2		1	1	1	2	2	4	2	2		2
11663	1	11	2	3	1	1	1		6			1	1	2	2					2		500000				4				3		1		2	2	2	2		1	1	1	2	2	4	2	1	1	1	1
11629	1	11	1	2	1	1	1		6			2	2	2	1					1	2	500000								3		1		2	2	2	2		1	1	1	2	2	4	2	1	1	1	1
112	1	13	1	2	2	1	1		6	1		1		2	1					2		500000				4				3		1		4	1	1	2		2	1	2	2	2	4	2	2		2
1083	2	21	2	1	2	1	1		5	1	1		1	1					1	1	2	500000								3		1		1	1	2	2		1	1	1	2	2	3	2	1	2	1	1
305	2	21	2	2	2	1	1		2	1		1		2	3							500000				4				3		1		2	2	2	2		2	1	2	2	2	3	2	1	1	1	1
395	2	21	1	2	4	5	1		1			1	1	1								500000				4				3		2		4	2	2	2		1	1	1	2	2	4	2	1	1	1	1
14038	2	21	1	3	1	1	1			1		3		1	1					1		500000				4				3		1		4	2	2	2		1	1	1	2	2	3	2	1	2	1	1
14041	2	21	2	4	2	4	1		6			2		2		4						500000								3		1		2	2	2	2		1	1	2	2	1	3	2	2
367	2	21	2	5	2	4	1		6					3		1						500000				4				3		1		10	2	2	2		2	2	2	2	2	4	2	1	1	1	1
13008	2	21	2	5	2	4	1		6					2	3		1					500000				4				3		1		10	2	2	2		1	1	1	2	2	4	2	1	1	1	1
333	2	21	2	2	2	1	1		6	1		2	1	1	1							500000				4				3		1		5	2	2	2		1	1	2	2	2	4	2	1	1	1	1
633	2	21	1	4	1	4	1		6					1						2		500000				4				3		1		3	1	2	2		1	1	1	2	2	3	2	1	1	1	1
633	2	21	1	4	1	4	1		6					1						2		500000				4				3		1		3	1	2	2		1	1	1	2	2	3	2	1	1	1	1
510	2	22	1	4	1	1	1		6	2	3	1	4	3	3	2	2		2	2		500000								3		1		12	1		2		2	1	2	2	2	3	2	2		2
500	2	22	2	3	1	1	1		6	0	0	2	4	1	1	0	0			2		500000			4					3		1		2	1	1	2		1	1	1	2	2	4	2	2		2
10536	2	22	2	1	2	1	1		2		1			1	1					1	2	500000								3		1		2	1	1	2		1	1	1	2	2	3	2	1	1	1	1
14000	2	22	2	3	1	4	1		6			2			1					2		500000								3		1		3	1	2	2		1	1	1	2	2	3	1	1	2	1	1
55	2	23	2	2	2	2	1		2	1	2	1	2	1	4	1				1	2	500000								3		1		7	1		2		1	1	1	2	2	4	2	2		2
53	2	23	2	1	4	1	1		2	1	2	1	4	1					2	2		500000				4				3		1		4	1	1	2		1	1	1	2	2	4	2	2		2
45	2	23	2	2	2	2	1		1	2	1	2	2	1	1					2		500000				4				3		1		5	1	1	2		1	1	1	2	2	3	2	2		2
76	2	23	2	1	2	1	1		2	1	1	1							1	1	2	500000				3				3		2		3	1	2	2		1	1	2	2	2	4	2	2		2
46	2	23	2	4	2	2	1		6	1	2	1	1	2					1	2		500000		2	3	4				3		1		8	1	1	2		1	1	2	2	2	3	2	2		2
5050	2	23	2	1	1	6	1		6	4	1									1	2	500000		1						3		1		6	1	1	2		1	2	2	2	2	5	2	2		2
5054	2	23	2	2	2	2	1		6	1	1	1	3	3					1	2		500000								3		1		2	1		2		1	1	2	2	2	4	2	2		2
11037	2	24	2	2	2	1	1		1	1	0	2	3	1	1	0	0	0	0		2	500000	0	2	1	2				3		1		6	1	1	2		1	1	2	2	2	3	1	1	2	1	1
11136	2	24	2	1	3	5	1		2		1	1	3	2	3	1		1		1	1	500000								3		1		4	1	1	2		1	1	1	2	2	4	2	1	3	1	1
11132	2	24	2	2	2	2	1		6	3	1	1	2	2	3				1	2		500000		3	5	10				3		1		4	1	1	2		1	1	1	2	2	4	2	1	5	1	1
199	2	25	1	2	1	1	1		6	1	1	2	3	3	2	0	0	0	2	1	1	500000		2	3	0				3		1		9	1	1	2		1	1	1	2	2	1	1	1	3	1	1
200	2	25	1	2	1	1	1		6	1	1	2	1	1	1	0	0	0	0	1	1	500000		7						3		1		9	1	1	2		1	1	1	2	2	1	1	1	3	1	1
11037	3	31	2	2	2	1	1		1	1	0	2	3	1	1	0	0	0	0		2	500000	0	0	0	2				3		1		6	1	1	2		1	1	2	2	2	3	1	1	2	1	1
266	3	31	2	4	1	4	1		6		1	1	1	1	2				1	1	2	500000								3		2			1	2	2		1	1	1	2	2	3	2	2		2
4035	3	31	1	2	1	5	1		1		2									2		500000				4				3		2		3	2	2	2		1	1	2	2	2	4	2	1	1	1	1
4334	3	31	1	2	1	1	1		1	2	3	2	1							2		500000				4				3		2		4	1	2	2		1	1	2	2	2	3	2	1	2	1	1
10680	3	32	1	5	1	4	1		6						2					2		500000								3		2		2	2	2	2		2	1	1	2	2	3	2	1	1	2
10599	3	32	1	1	1	1	1		6	1				2	1				1	1	1	500000								3		1		1	1	2	2		1	1	1	2	2	3	2	1	1	1	1
11043	3	33	1	4	1	2	1		6	0	0	1	5	4	2	0	0	0	0	2		500000	0	1	2	12				3		1		5	1	1	2		1	1	1	2	2	2	1	1	2	1	1
11037	3	33	2	2	2	1	1		1	1	0	2	3	1	1	0	0	0	0		2	500000	0	0	0	2				3		1		6	1	1	2		1	1	2	2	2	3	1	1	2	1	1
24300	3	33	1	3	2	1	1		6	1	1	0	1	2	1	0	0	0	1	1	2	500000				5				3		1		3	1	2	2		1	1	1	2	1	4	2	2		1	1
103	4	41	1	4	1	1	1		6	0	0	2	2					2	2	2		500000								3		1		3	1	2	2		2	1	1	2	2	3	2	1	2	1	1
99	4	41	1	5	1	1	1		2	0	2	2	3								2	500000								3		2		3	2	2	2		1	1	1	2	2	2	1	1	2	1	1
1103	4	41	2	1	2	1	1		1	1			1	3	2			2	1	1	1	500000				4				3		1		3	1	2	2		2	1	2	2	1	3	2	1	1	1	1
684	4	41	2	2	2	1	1		3			1		1	1							500000				2				3		1		1	1	1	2		1	1	1	2	1	4	2	1	1	1	1
9084	4	41	1	2	1	2	1		5	2			2	1	1					1	1	500000		4	6	7				3		1		4	1	1	2		1	1	1	2	2	5	2	2		2
1003	4	41	1	1	1	1	1		2		2	2	1	1	1				1	2		500000		1		10				3		1		3	1	2	2		1	1	1	2	1	5	1	1	1	1	1
1063	4	42	2	2	2	1	1		6	1			1	1	1					2		500000								3		1		1	1	2	2		1	1	1	2	2	2	2	1	1	1	1
1085	4	42	1	2	1	1	1		6	1		1	2	1	1			1		2		500000								3		1		1			2		1	1	1	2	2	3	2	2		2	2
3444	4	42	2	1	2	3	1		5	0	0	2	1	0	1	0	0	0	0			500000			1	4				3		3	ZINC	2	1	1	2		1	1	1	2	2	4	2	1	1	1	1
2201	4	42	1	2	2	1	1		3				1							2		500000			3					3		3		1	2	2	2		1	1	1	2	2	2	2	2		2
2231	4	42	1	1	1	1	1		2	1											2	500000								3		1		3	1	1	2		1	1	1	2	2	1	2	2		2
66	4	42	1	1	2	2	1		6			4	2	1	2					1	1	500000								3		1		6	1	1	2		2	1	1	2	2	4	2	1	11	1	1
64	4	42	1	1	1	2	1		3	1	1	11	1	2						1	1	500000				10				3		1		4	1	1	2		1	1	1	2	1	3	2	1	1	1	1
1475	4	42	1	3	2	2	1		1	0	0	2	2	1	2	1	1			2		500000				4				3		1		3	2	2	2		1	1	1	2	2	3	2	2		1	1
1510	4	42	2	2	1	2	1		1		1	2	3	1	4				1	2		500000								3		1			2	2	2		1	1	1	2	2	4	2	1	1	1	1
4035	4	42	1	2	1	5	1		1		2									2		500000				4				3		2		3	2	2	2		1	1	2	2	2	4	2	1	1	1	1
4334	4	42	1	2	1	1	1		1	2	3	2	1							2		500000				4				3		2		4	1	2	2		1	1	2	2	2	3	2	1	2	1	1
55	4	42	2	2	2	2	1		2	1	2	1	2	1	4	1				1	2	500000								3		1		7	1		2		1	1	1	2	2	4	2	2		2
53	4	42	2	1	4	1	1		2	1	2	1	4	1					2	2		500000				4				3		1		4	1	1	2		1	1	1	2	2	4	2	2		2
45	4	42	2	2	2	2	1		1	2	1	2	2	1	1					2		500000				4				3		1		5	1	1	2		1	1	1	2	2	3	2	2		2
76	4	42	2	1	2	1	1		2	1	1	1							1	1	2	500000				3				3		2		3	1	2	2		1	1	2	2	2	4	2	2		2
46	4	42	2	4	2	2	1		6	1	2	1	1	2					1	2		500000		2	3	4				3		1		8	1	1	2		1	1	2	2	2	3	2	2		2
5050	4	42	2	1	1	6	1		6	4	1									1	2	500000		1						3		1		6	1	1	2		1	2	2	2	2	5	2	2		2
5054	4	42	2	2	2	2	1		6	1	1	1	3	3					1	2		500000								3		1		2	1		2		1	1	2	2	2	4	2	2		2
3022	4	42	1	2	1	1	1		2		2	1	2	1	1			1		1	1	500000								3		3		6	1	1	2		1	1	1	2	2	2	2	1	1	1	1
123	4	42	1	2	1	6	1		3				2									500000				3				3		1		2	2	1	2		1	1	1	2	2	4
24300	1	12	1	3	2	1	1		6	1	1	0	1	2	1	0	0	0	1	1	2	500000				5				3		1		3	1	2	2		1	1	1	2	1	4	2	2		1	1
14000	1	12	2	3	1	4	1		6			2			1					2		500000								3		1		3	1	2	2		1	1	1	2	2	3	1	1	2	1	1
38	1	11	1	1	3	3	2		6	2	3	3	2	1	4	0	0	2	1	1	1	500000		2	3	3				3		1		5	1	1	2		1	1	1	2	2	3	2	1	1	1	1
14031	1	11	2	1	2	1	2		1		2			1	1				2	1	1	500000				2		6	DUCKS 12	3		3	ZINC	5	1	1	2		2	1	1	2	2	3	2	1	1	1	1
161	1	11	1	2	1	2	2		6	1	1	1	1							1	2	500000								3		1		1	1	2	2		2	2	2	2	1	3	2	1	2	1	1
10353	1	11	1	4	1	1	2		2	2	1	3	2					1		1	2	500000				4				3		1		4	1	2	2		2	2	2	2	2	3	1	1	3	1	1
440	1	11	1	3	1	2	2		6			3		2	1				1	1	1	500000			1	4				3		1		7	1	1	2		1	1	1	2	1	3	2	2		1	1
10676	1	12	1	2	1	1	2		6	1	2								2	2		500000			3					3		3		4	1	1	2		1	1	1	2	2	3	2	1	1	1	1
10491	1	12	2	3	3	4	2		6				2	1						1	2	500000		3		10				3		2		3	1	1	2		2	1	2	2	2	3	1	1	2	1	1
285	1	12	2	2	2	2	2		2	1	1	1	1							2		500000			3					3		2		3	2	2	2		1	1	1	2	2	2	2	2		2
11190	1	13	1	3	2	1	2		4			2	3							2		500000		3		11				3		2		3	2	1	2		1	1	2	2	2	3	2	2		2
86	1	13	1	2	1	2	2		5	2			2	1	1					1	1	500000		4	6	7				3		1		4	1	1	2		1	1	1	2	2	5	2	2		2
72	1	13	1	1	1	1	2		2		2	2	1	1	1				1	2		500000		1		10				3		1		3	1	2	2		1	1	1	2	1	5	1	1	1	1	1
90	1	13	1	2	1	2	2		6		2			2	4				1	1	1	500000				6				3		1		7	1	2	2		1	1	1	2	2	5	2	1	1	1	1
143	1	13	2	3	1	1	2		6			2	3	1						1	2	500000				4				3		1		1	1	2	2		1	1	1	2	2	3	2	1	1	1	1
158	1	13	1	3	1	1	2		6			3	1							1	1	500000				4				3		1		2	1	2	2		1	1	1	2	2	4	2	1	1	1	1
10113	2	21	2	2	2	1	2		2		1	2							1	1	2	500000		2		3				3		2		1	2	1	2		2	1	2	2	2	4	1	1	1	1	1
14039	2	21	2	4	2	1	2		6			1	1			1	1					500000								3		1		4	2	2	2		2	1	2	2	2	2	2	1	2	1	1
14043	2	21	2	3	2	1	2		6			4	3	2	2							500000								3		1		5	2	2	2		2	2	2	2	2	3	2	2
380	2	21	2	3	2	2	2		6			2		1	3							500000								3		1		5	2	2	2		2	1	2	2	2	4	2	2
13004	2	21	1	5	1	1	2		6						2	4	1					500000				4				3		1		2	2	2	2		2	1	2	2	2	4	2	1	1	1	1
613	2	21	2	3	2	1	2			1		2		1	1					1	2	500000				4				3		2		4	2	2	2		2	2	2	2	2	4	2	1	1	1	1
572	2	22	1	3	1	1	2		6	2	1	4	2	1	1			1	1	1	1	500000				6				3		1		5	1	2	2		1	1	1	2	2	2	2	1	2	1	1
574	2	22	2	1		1	2		1	2	0	3	3	1	1	0	0	1	1	1	2	500000		3		8				3		1		4	1	2	2		1		1			2	2	1	2	2	1
412	2	22	1	2	1	1	2		2	1	2	1	1	1				1	1	2		500000				4				3		1		4	1	2	2		1	1	1	2	2	3	2	1	1	1	1
243	2	23	1	2	1	1	2		6	1	1	2	2	3	3				2	1	2	500000								3		1		5	1	2	2		1	1	1	2	2	3	2	1	1	1	1
248	2	23	1	3	1	3	2		6	1		2	2		3					1	2	500000								3		1		4	1	1	2		1	1	1	2	1	3	2	1	1	1	1
251	2	23	1	2	1	1	2		1		1	2	2	3				1		1	2	500000								3		1		5	1	1	2		1	1	1	2	2	3	2	1	1	1	1
10866	2	23	1	1	1	1	2		2	1		2	2	3	3				1	1	2	500000								3		1		4	1	1	2		1	1	1	2	2	3	2	1		1	1
10859	2	23	1	1	1	1	2		6	1		2	2	3			4		2	1	2	500000								3		1		5	1	1	2		1	1	1	2	2	3	2	1		1	1
10854	2	23	1	2	1	1	2		1	1	1		2					1	1	1	2	500000		2	3	4				3		1		5	1	1	2		1	1	1	2	1	3	2	1	1	1	1
10309	2	24	1	2	1	2	2		1			2	1	1	2					2		500000		1	2	10				3		1		3	1	1	2		1	1	2	2	2	4	2	2		2
12060	2	25	2	5	2	4	2		6	0	0	2	2	2	2	1	0	0	1	1	1	500000	0	0	1	1				3		1		4	1	2	2		2	2	2	2	2	1	1	1	2	2
227	2	25	1	2	1	2	2		6	1	1	2	3	3	2	0	0	2	2	1	1	500000	0	2	3					3		1		9	1	1	2		1	1	1	2	2	1	1	1	3	1	1
175	2	25	1	2	1	2	2		2	1	1	2	3	3	2	0	0	0	2	1	1	500000		2	3					3		1		9	1	1	2		1	1	1	2	2	1	1	1	3	1	1
64	2	25	1	3	1	2	2		6	1		1		3	1					2		500000			3					3		1		4	1	1	2		1	1	1	2	2	3	1	1	5	1	1
65	2	25	1	3	1	1	2		6		1		1	1	3					2		500000				4				3		1		3	1	1	2		1	1	2	2	2	3	2	1	2	1	1
11036	3	31	1	5	1	2	2		5	0	0	2	2	1	2	0	0	0	0	2		500000	0	3	4	10				3		2		3	1	1	2		1	2	2	2	2	2	1	1	1	1	1
11092	3	32	1	3	1	2	2		6			6	4							2		500000			3	2				3		2		5	1	1	2		1	1	1	2	1	4	1	1	1	1	1
11490	3	32	1	3	1	1	2		3			2	2	3	3					1	1	500000				12				3		1		3	2	1	2		1	1	1	2	2	4	1	1	1	1	1
379	3	33	2	3	2	1	2		6	1	1	2	3	2	1			0	2	2		500000								3		1		3	2	2	2		1	1	1	2	2		2	1	2	1	2
11036	3	33	1	5	1	2	2		5	0	0	2	2	1	2	0	0	0	0	2		500000	0	3	4	10				3		2		3	1	1	2		1	2	2	2	2	2	1	1	1	1	1
209	3	34	1	2	1	3	2		1			1	2							2		500000								3		1		5	2		2		2	1	1	2	2	3	2	1	2	1	1
102	3	34	1	3	1	1	2			1				1	1			1	0	1	1	500000		4		8				3		2		3	1	1	2		2	1	1	2	2	2	2	1	1	1	1
485	4	41	1	2	1	1	2		6	0	1	2	1	1	1	0	0	0	0	1	1	500000			12					3		3		3	2	1	2		1	1	2	2	2	2	2	1	1	1	1
412	4	42	1	2	1	1	2		2	1	2	1	1	1				1	1	2		500000				4				3		1		4	1	2	2		1	1	1	2	2	3	2	1	1	1	1
10681	1	12	2	3	1	4	3		6											2		500000				3				3		1		3	1	1	2		1	1	1	2	2	3	2	1	1	1	1
5122	2	23	1	1	1	1	3		6	1	1	1								1	1	500000		1						3		1		2	1	1	2		1	1	2	2	2	3	2	1	1	1	1
244	2	23	1	2	2	1	3		6	1	1	2	2	3	3				2	1	2	500000								3		1		4	1	2	2		1	1	1	2	2	3	2	1	1	1	1
5122	4	42	1	1	1	1	3		6	1	1	1								1	1	500000		1						3		1		2	1	1	2		1	1	2	2	2	3	2	1	1	1	1
156	1	13	1	1	2	1	4		1	1										2		500000				4				3		1		1	2	2	2		2	1	1	2	2	2	1	1	1	1	1
369	2	21	1	4	2	1	4		6					3	4	1	1					500000				4				3		1		6			2		1	1	1	2	2	4	2	2
129	2	25	1	1	3	1	4		3		1	1								2		500000								3		1		5	1	2	2		1	1	2	2	2	4	2	2		2
155	3	33	1	2	1	5	4		1			1	1	2	2	1	2			2		500000								3		3	TAPAULIN	3	2	2	2		1	1	1	2	2	4	2	1	2
761	4	42	1	3	1	1	4		2			1	2	1	1					2		500000				2				3		1		2	1	2	2		1	1	1	2	2	3	2	1	2	1	1
799	4	42	1	1	1	1	4		3	0	1	2	1	1	0	0	0	1		1	1	500000								3		1		3	1	1	2		1	1	1	2	2	3	2	1	5	1	1
3027	4	42	1	1	1	6	4		6			1			1				2	1	1	500000								3		3		6	1	1	2		1	1	1	2	2	3	2	2		1	1
20500	1	12	1	1	1	5	5		3											2		500000								3		1		1	2	2	2		1	1	2	2	2	4	2	2		2
306	2	21	1	3	1	1	5		6		1			1	1				2	2		500000								3		1		1	2	2	2		1	2	2	2	2	4	2	2
20500	2	22	1	1	1	5	5		3											2		500000								3		1		1	2	2	2		1	1	2	2	2	4	2	2		2
11277	2	24	1	1	1	5	5		3	1	1	1		1	1			1		2		500000								3		1		2	1	2	2		1	1	1	2	1	3	2	2		2
3198	3	31	1	1	1	2	5		2	1	1	1	2	1	2	1			1	1	1	500000		2		4				3		1		6	1	1	2		1	1	1	2	2	1	1	1	4	1	1
12079	3	33	1	1	1	2	5		2	3	0	0	0	1	1	0	0	1	1	1	1	500000	0	0	0	3				3		1		3	1	2	2		1	1	2	2	1	2	2	1	3	1	1
464	4	41	1	1	1	2	5		6	2		2	2	1					2	1	2	500000								3		1		4	1	2	2		1	1	1	2	1	3	2	2			2
3198	4	42	1	1	1	2	5		2	1	1	1	2	1	2	1			1	1	1	500000		2		4				3		1		6	1	1	2		1	1	1	2	2	1	1	1	4	1	1
3115	1	12	1	2	1	1	6		1	1	2	1	1	1	2	1			1	1	2	500000			3					3		1		4	1	1	2		1	1	1	1	2	4	2	1	2	1	1
3121	4	42	1	1	1	1	6		6		1		1	1	1				1	2		500000								3		3		3	1	2	2		1	1	1	2	2	3	2	1	1	1	1
446	1	11	1	1	3	5	7		4			1			2							500000								3		1		4	1	1	2		1	1	1	2	1	3	2	2		1	1
58	1	13	2	1	1	5	7		3		1				1					2		500000				6				3		1		1	1	1	2		1	1	2	2	2	5	2	1	1	1	1
10743	2	23	1	1	3	5	7		3		1	1		3	4				1	1	1	500000				4				3		1		4	1	1	2		1	1	1	2	2	2	1	1	1	1	1
540	2	25	1	1	4	5	7		2	0	0	2	3	1	2	0	0	0	0	2		500000								3		1		3	2		2		1	1	1	2	2	4	2	2			2
9089	4	41	2	1	1	5	7		3		1				1					2		500000				6				3		1		1	1	1	2		1	1	2	2	2	5	2	1	1	1	1
184	2	25	1	2	1	2	2		6	1	1	2	3	3	2				2	1	1	500000	1	2	3					3		1		9	1	1	2		1	1	1	2	2	1	1	1	3	1	1
187	2	25	1	2	1	1	2		6	1	1	2	3	3	2				2	1	1	500000		2	3					3		1		9	1	1	2		1	1	1	2	2	1	1	1	3	1	1
175	2	21	1	4	1	1	8	ATAYA BASE	5	1	2	3	1							2		500000			3					3		1		4	1	1	2		1	1	1	2	1	2	2	1	2	1	1
175	4	42	1	4	1	1	8	ATAYA BASE	5	1	2	3	1							2		500000			3					3		1		4	1	1	2		1	1	1	2	1	2	2	1	2	1	1
12200	3	33	1	2	1	1	8	DISABLE	6	1			1	1	1			0	1	1	2	500000			1	2				3		1		1	2	2	2		1	1	1	2	2	3	1	1	1	1	1
358	2	21	1	3	1	1	8	MASON	3			31		1	1							500000				4				3		2		5	2	2	2		1	1	2	2	2	4	2	1	3	1	1
193	3	31	1	1	1	1	8	MASON	1	1	2	5	4	3	3		2	1	3	2		500000		2	3	4				3		1		3	1	1	2		1	1	1	2	2	2	2	2		1	1
5302	1	11	1	2	1	1	8	MECHANIC	3	1									2	1	1	500000			3					3		1		2	1	1	2		1	1	1	1	2	2	2	2		2
14011	1	12	1	5	1	4	8	MECHANIC	2		1					1				1	1	500000				9				3		3	ZINC	5	1	1	2		2	1	1	2	2	3	2	1	1	1	1
4090	3	31	1	1	1	5	8	MECHANIC	2	1	3	1	1	1						1	2	500000			3	4				3		1		3	1	2	2		1	1	1	2	2	2	2	1	1	1	1
4090	4	42	1	1	1	5	8	MECHANIC	2	1	3	1	1	1						1	2	500000								3		1		3	1	2	2		1	1	1	2	2	2	2	1	1	1	1
166	4	42	1	2	1	1	8	OMOLANKAY RIDER	6				1	1	1	1				2		500000				4				3		1		3	2	2	2		1	1	1	2	2	2	2	1	1	1	1
10839	2	23	1	1	1	1	8	PHOTOGRAPHER	2	1	1	2	2	3	3				1	1	2	500000								3		1		4	1	1	2		1	1	1	1	1	3	2	1		1	1
1477	4	42	2	2	3	1	8	STONE MINER	6	0	1	1	2	0	1	1	1		1	2		500000			3					3		3		2	2	2	2		1	1	1	2	2	3	2	1	1	1	1
301	1	13	2	3	1	6	2		6			3			1	2		1	2	1	2	530000		1	2	12				3		1		4	1		2		1	1	1	2	2	3	2	1	1	1	1
1467	4	42	1	2	3	1	1		1	0	1	1	2	0	1	1	1		1	2		560000				4				3		1		3	2	2	2		1	1	1	2	2	3	2	1	1	1	1
1025	4	42	2	4	1	4	1		6			2	3	1	1					2		580000								3		1		5	1	2	2		1	1	1	1	2	1	2	1	2	1	1
1091	4	42	2	4	1	4	1		6			2	3	1	1					2		580000								3		1		5	1	2	2		1	1	1	2	2	1	2	1	2	1	1
151	1	13	1	2	1		2													2		600000				4				3		1		1	2	2	2		1	1	1	2	2	3	2	2		2
503	2	21	1	2	1	5	2		6	0	0	1	3	2	1	1	0	2	2	2		600000								3		1		10		1	2			2	1	1	1	4	2	2		2
89	1	13	1	2	1	1	1		2	1		1		4	1					1	1	600000		1	1	6				3		1		4	1	1	2		1	1	1	2	1	5	2	1	1	1	1
5121	2	23	2	1	3	5	1		2	1	1	1	1	2						1	2	600000				3				3		2		3	1	2	2		1	1	1	1	1	4	2	2		2
11043	3	31	1	4	1	2	1		6	0	0	1	5	4	2	0	0	0	0	2		600000	0	1	2	12				3		1		5	1	1	2		1	1	1	2	2	2	1	1	2	1	1
884	4	41	2	1	2	1	1		2	1	2	1		1	1				2	1	1	600000				4				3		1		2	2	2	2		1	1	1	2	2	3	2	2		2	1
1404	4	41	2	2	2	1	1		5	3	2	2	1	3	4			1	2	2		600000								3		1		5	1	2	2		1	1	1	2	2	4	2	2		2
860	4	42	1	1	1	6	1		2				2		1					2		600000								3		1		1	2	2	2		2	1	2	2	2	3	2	1	1	1	1
1919	4	42	2	3	1	1	1		6	1				2	2					1	1	600000								3		1		1	2	2	2		2	1	2	2	2	2	1	1	1	2
5121	4	42	2	1	3	5	1		2	1	1	1	1	2						1	2	600000				3				3		2		3	1	2	2		1	1	1	1	1	4	2	2		2
11190	1	12	2	2	2	1	2		6			2	3							2		600000		3		11				3		2		3	2	1	2		1	1	2	2	2	3	2	2		2
573	2	22	1	4	1	1	2		6	2	2	1	1	1		2	1	1	2	1	2	600000			2	3				3		1		7	1		2		2	2	2	2	2	1	1	1	2	1	1
339	2	23	1	2	1	1	2		3	0	0	1	2	2	1	0	0	0	0	2		600000								3		1		4	2	1	2		1	1	1	2	2	2	2	1	1	1	1
253	2	23	1	2	1	1	2		1	1		2	2	3					1	1	2	600000								3		1		5	1	1	2		1	1	1	2	2	3	2	1	1	1	1
254	2	23	1	2	1	1	2		6	1	1	2	2	3					1	1	2	600000								3		1		5	1	2	2		1	1	1	2	2	3	2	1	1	1	1
10874	2	23	1	2	1	5	2		6	1	1		2	3					1	1	2	600000								3		1		5	1	1	2		1	1	1	2	1	3	2	1	2	1	1
10870	2	23	1	2	2	1	2		6	1	1	2	2	3						1	2	600000								3		1		4	1	1	2		1	1	1	2	2	3	2	1	1	1	1
10864	2	23	1	1	1	1	2		2		1	2	2	3				1	2	1	2	600000								3		1		4	1	1	2		1	1	1	2	2	3	2	1		1	1
10863	2	23	1	1	1	1	2		3		1	2	2	3				1	2	1	2	600000								3		1		4	1	1	2		1	1	1	2	1	3	2	1	1	1	1
282	2	24	1	2	1	1	2		1	0	1	2	2	1	1	0	0	0	1	2		600000								3		2		2	2	2	2		1	1	1	2	2	1	2	1	2	1	1
11122	2	24	1	3	1	1	2		1			3	2	3	1					1	2	600000		2		12				3		1		3	1	1	2		1	1	1	2	2	3	2	1	4	1	1
299	2	25	2	4	1	1	2		6	1	1	3	4	1	2	0	0	0	2	2		600000	2	6	9	20				3		2		7	1	1	2		1	1	1	2	2	1	1	1	2	1	1
197	2	25	1	2	1	1	2		6	3	2	4	3	1	2	0	0	0	2	1	1	600000		2	4	4				3		2		7	1	1	2		2	2	2	2	2	2	1	1	4	1	1
581	2	25	2	3	1	1	2		6	2	2	1	2	1	4	1	0			2		600000								3		2		5	2	2	2		2	2	2	2	2	2	2	1	3	1	1
11482	3	32	1	4	1	1	2		2	1		2	2						1	2		600000			2					3		1		5	2	1	2		1	2	1	2	2	2	2	1	2	2
11610	3	32	2	3	2	1	2		6			2		3		4				1	2	600000		1	1	4				3		1		2	2	1	2		1	1	1	2	2	4	2	1	1	1	2
12033	3	34	2	2	2	1	2		1	2		1		1	2			1	1	1	2	600000		1		3				3		3		3	1	2	2		1	1	1	2	2	4	2	1	4	1	1
474	4	41	1	1	1	1	2		2	1	0	0	0	1	1	0	0	0	1	1	1	600000								3		1		2	1	2	2		1	1	1	2	2	3	1	2		1	1
10302	1	11	1	2	1	1	3		6			2						1		1	1	600000			1	15				3		1		4	1	1	2		1	1	1	2	2	4	2	2		1	1
135	1	13	1	2	1	1	3		2			1	1							1	2	600000				4				3		2		2	2	2	2		2	1	1	2	2	3	2	2		2
435	2	22	1	2	1	1	3		3		4	2		1	2	3			1	1	1	600000		2		4				3		1		5	1	1	2		1	1	1	1	2	1	2	1
435	4	42	1	2	1	1	3		3		4	2		1	2	3			1	1	1	600000		2		4				3		1		5	1	1	2		1	1	1	1	2	1	2	1
905	2	21	1	1	4	5	5		2		3		4	1	2			1	1	1	1	600000				4		6	DUCKS 6	3		1		4	1	2	2		1	1	1	1	2	3	1	1	2	1	1
162	3	31	1	2	1	2	5		2	1	2	3	1	4	1			2	1	1	1	600000		2		4				3		1		5	1	1	2		1	1	1	2	2	2	1	1	3	1	1
905	4	42	1	1	4	5	5		2		3		4	1	2			1	1	1	1	600000				4		6	DUCKS 10	3		1		4	1	2	2		1	1	1	1	2	3	1	1	2	1	1
162	4	42	1	2	1	2	5		2	1	2	3	1	4	1			2	1	1	1	600000		2		4				3		1		5	1	1	2		1	1	1	2	2	2	1	1	3	1	1
1019	4	42	1	1	3	5	5		2		1	2	1	2	1					1	2	600000				4				3		1		3	1	2	2		1	1	1	2	2	2	2	1	1	1	1
11196	2	24	1	4	1	2	6		2	1			2	2	3		1		1	1	2	600000								3		1		3	1	2	2		1	1	1	1	2	3	2	2		2
12200	2	24	1	2	1	1	8	DISABLE	6	1			1	1	1			0	1	1	2	600000		2	1	2				3		1		1	2	2	2		1	1	1	2	2	3	1	1	1	1	1
158	1	13	1	1	1	1	8	MINING	6	2	1		3						2	2		600000								3		1		1	2	2	2		2	1	1	2	2	4	2	2		2
10887	2	23	1	1	1	1	8	PHOTOGRAPHER	4	1	1	2	2	3	3	4	4		2	1	2	600000								3		1		4	1	1	2		1	1	1	1	1	3	2	1	2	1	1
10824	2	23	1	1	1	1	8	PHOTOGRAPHER	2			2	2									600000								3		1		5	1	2	2		1	1	1	2	1	3	2	2		2
11122	1	12	2	2	2	1	1		2				3						1		2	650000			3	2				3		3		4	2	1	2		2	1	2	2	2	3	1	1	1	2
11122	2	24	2	2	2	1	1		2				3						1		2	650000			3	2				3		3		4	2	1	2		2	1	2	2	2	3	1	1	1	2
349	2	23	1	4	1	2	2		1	2	1	0	4	3	3	0	0	1	0	1	1	650000								3		2		4	2	2	2		1	1	1	2	2	1	2	1	2	1	1
377	3	33	1	3	1	1	2		2			3		2	2					2		660000								3		2		4	2	2	2		1	1	1	2	2	3	2	1	1	1	1
11146	2	24	2	2	2	1	1		1			3	1	2	2		1			1	1	680000		2	8	5				3		1		4	1	1	2		1	1	1	2	1	3	2	1	4	1	1
296	2	25	1	1	3	5	2		3	0	0	1	0	1	1	0	0	0		2		700000								3		2		3	2	2	2		1	1	2	2	2	3	2	1	1	1	1
11122	3	31	2	2	2	1	1		2				3						1		2	700000		1	3	2				3		3		4	2	1	2		2	1	2	2	2	3	1	1	1	2
4096	3	31	1	2	1	6	1		3	1	2	1	1							2		700000			3	4				3		1		2	1	2	2		1	1	1	2	2	2	2	1	1	1	1
213	3	34	2	2	2	2	1		1		1	1	2	2	2			1	1	1	2	700000				3				3		1		4	1	2	2		1	1	1	2	1	2	1	1		1	1
127	3	34	2	2	2	2	1		1	1	1	2	1	1	1			0	1	1	2	700000				4				3		1		4	1	2	2		1	1	1	2	1	2	1	1	5	1	1
1079	4	42	2	1	4	2	1		6			3	1	1	1							700000								3		1		2	2	2	2		1	1	1	2	2	4	2	1	1	1	1
1083	4	42	2	1	2	1	1		3		1			1	1				1	2		700000								3		1		1	2	2	2		1	1	1	2	2	2	1	1	1	1	1
1309	4	42	1	3	1	1	1		6		1		1						1	1	2	700000								3		2		2	2	2	2		2	2	2	2	2	2	1	1	2	1	2
4096	4	42	1	2	1	6	1		3	1	2	1	1							2		700000			3	4				3		1		2	1	2	2		1	1	1	2	2	2	2	1	1	1	1
295	1	12	1	4	2	1	2		1	1	1	1	1	2					1	1	1	700000				4				3		1		5	1	1	2		1	1	1	2	2	2	2	2		2
14019	1	12	2	4	1	4	2		6			2	1	1	2					1	1	700000		1		8				3		3	ZINC	3	1	1	2		2	1	1	2	2	3	2	1	1	1	1
3174	2	23	2	3	2	1	2		6	2	1	1							2	1	1	700000				3				3				8	1	1	2		1	2	2	2	2	4	2	2		1	1
242	2	23	1	2	1	1	2		6	1	1	2	2	3					1	1	2	700000								3		1		5	1	1	2		1	1	1	2	2	3	2	1	2	1	1
10873	2	23	1	2	1	4	2		6		1	2	2		3					1	2	700000								3		1		4	1	1	2		1	1	1	2	2	3	2	1		1	1
10868	2	23	1	2	1	1	2		2		1	2	2	3				1	2	1	2	700000								3		1		4	1	1	2		1	1	1	2	2	3	2	1	1	1	1
10861	2	23	1	1	1	1	2		3	1		2	2	3	3				1	1	2	700000								3		1		5	1	2	2		1	1	1	2	2	3	2	1		1	1
10860	2	23	1	1	1	1	2		2	1		2	2	3	3				1	1	2	700000								3		1		4	1	1	2		1	1	1	2	2	3	2	1		1	1
10858	2	23	1	1	1	1	2		4		1	2	2	3	3			1	1	1	2	700000								3		1		4	1	1	2		1	1	1	2	2	3	2	1		1	1
11036	2	24	1	5	1	2	2		5	0	0	2	2	1	2	0	0	0	0	2		700000	0	3	4	10				3		2		3	1	1	2		1	2	2	2	2	2	1	1	1	1	1
374	3	33	2	4	2	1	2		6	1	1	2	2	4	1			0	2	2		700000								3		2		3	2	2	2		1	1	2	2	2	3	2	1	2	1	1
2020	4	42	2	4	1	4	2		6			2	1	1	2					1	1	700000								3		3		3	1	1	2		1	1	1	2	2	3	2	1	1	1	1
11120	1	12	1	3	1	1	4		3				3					1	1	1	2	700000		3		6				3		2		3	2	1	2		2	1	2	2	2	3	2	1	1	1	1
237	2	25	1	3	1	2	5		5	3	1	4	3	2	3			1	2	1	2	700000			3	4				3		1		8	1	1	2		2	1	1	2	2	2	1	1	3	1	1
38	2	25	1	2	1	2	5		6	1	1	1	1		1			1		1	2	700000				4				3		1		3	1	1	2		1	1	1	2	1	3	2	1	1	1	1
1019	3	31	1	1	3	5	5		2		1	2	1	2	1					1	2	700000				4				3		1		3	1	2	2		1	1	1	2	2	2	2	1	1	1	1
12078	3	33	1	2	1	1	5		3	1	0	0	0	1	1	0	0	0	0	2		700000	0	0	0	24				3		1		3	2	1	2		1	1	1	2	1	3	2	1	1	1	1
10841	2	23	1	1	1	1	8	PHOTOGRAPHER	2	1	1	2	2						1	1	2	700000								3		1		4			2		1	1	1	2	2	3	2	1		1	1
10838	2	23	1	2	1	1	8	PHOTOGRAPHER	4	1	1	2	2						2	1	2	700000								3		1		4	1	1	2		1	1	1	1	1	3	2	1	2	1	1
10832	2	23	1	1	1	5	8	PHOTOGRAPHER	3			2	2									700000								3		1		4	1	2	2		1	1	1	2	1	3	2	2		2
10823	2	23	1	2	1	1	8	PHOTOGRAPHER	3			2		3						2		700000								3		1		4	1	1	2		1	1	1	2	2	3	2	2		2
300	2	25	1	3	1	1	2		2	0	0	2	1	2	1	0	0			2		720000	1	2	3	12				3		2		4	2	1	2		1	1	1	2	2	1	2	1	2	1	1
371	3	33	1	2	1	2	2		1	2		2		2	3			1	0	1	1	720000								3		1		3	1	2	2		1	1	1	2	2	1	1	1	2	1	1
10566	3	32	1	2	1	5	4		2					1	1			1		1	1	720000				4		6	DOGS 2	3		2		2	2	2	2		1	1	1	2	2	3	2	2		2
10474	2	22	1	1	1	1	1		2			1								2		750000								3		1		1	2	2	2		2	1	1	2	2	3	2	2		2
11148	2	24	2	1	2	1	1		1		1	1	1	2	3					1	1	750000				6				3		1		3	1	1	2		1	1	1	2	2	4	2	1	3	1	1
11125	2	24	1	2	1	1	1		1	1			2	3	1					1	1	750000			4					3		1		3	1	1	2		1	1	1	2	2	4	2	1	3	1	1
3368	1	13	1	1	1	4	2		3	1	1	1	1	2						2		750000		2		4				3		2		5	1	1	2		1	1	1	2	2	2	2	2		2
12166	2	24	1	5	1	2	2		4	0	1	0	5	0	1	1	0	0	0	1	2	750000				5				3		1		4	1	1	2		1	1	1	1	2	3	2	1	1	2
12166	3	33	1	5	1	2	2		4	0	1	0	5	0	1	1	0	0	0	1	2	750000				5				3		1		4	1	1	2		1	1	1	1	2	3	2	1	1	2
159	1	12	1	3	1	2	8	WHEELBARROW RIDER	5	1			2	1				1		2		750000		2	3					3		2		4	2	1	2		1	1	1	2	2	2	1	1	1	1	1
2065	4	42	1	3	1	2	8	WHEELBARROW RIDER	5	1			2	1				1		2		750000		2	3					3		2		4	2	1	2		1	1	1	2	2	2	1	1	1	1	1
186	1	11	1	1	1	1	1		1	1			1						2	1	1	800000								3		1		2	2	2	2		1	1	2	2	2	3	2	1	1	1	1
11656	1	11	2	2	2	1	1		6			2	2	2	1					2		800000				3				3		1		3	1		2		1	1	1	2	2	3	2	1	1	1	1
11625	1	11	1	2	3	1	1		5			2	1	1	2					1	2	800000				3				3		1		3	2	2	2		1	1	1	2	2	4	2	2		2
30162	1	13	2	2	2	2	1		1	1	1	1	1					1	2	1	1	800000					5			3		2		5	1	1	2		1	1	1	2	2	3	2	1	1	1	1
130	1	13	1	3	1	3	1		2			1	2							1	2	800000				4				3		1		2	1	2	2		2	1	2	2	2	2	1	1	2	1	1
146	1	13	2	3	1	4	1		6			3	2		1					1	2	800000				4				3		1		3	1	1	2		1	1	1	2	2	3	2	1	1	1	1
384	2	21	2	3	2	1	1		1		2	2		1	2			1	0	1	2	800000								3		1		2	2	2	2		1	1	1	2	2	3	2	1	2	2	2
1088	2	21	1	3	1	1	1		2	2					1			1	1	1	2	800000								3		2		2	2	2	2		1	1	2	2	2	3	2	1	1	1	1
4273	2	21	2	1	1	1	1		6	1	1	1						1		2		800000								3		2		1	1	2	2		1	1	1	2	2	3	2	2			2
587	2	22	1	1	4	5	1		2	0	1	1	2	3	1	0	0	2		2		800000				1				3		2		3	1	2	2		2	1	2	2	2	3	2	1	2	1	1
509	2	22	2	2	1	4	1		6	0	0	2	4	1	1	0	0	2	2	2		800000				4				3		1		4	1	1	2		2	1	1	2	2	4	2	2		2
5059	2	23	2	2	2	1	1		1	1	3	3	1							2		800000		2	3	4				3		1		5	1	1	2		1	1	1	2	2	5	2	2		2
355	2	24	1	2	1	1	1		6	0	3	2	0	1	1	0	0	0	0	2		800000	5	3	10					3		1		4	1	1	2		1	1	1	2	2	2	2	2		1	1
10310	2	24	2	1	3	5	1		2			2	1	1	2					2		800000				11				3		1		3	1	2	2		1	1	1	2	2	1	2	1	1	1	1
10719	2	25	2	2	2	1	1		6	0	0	2	3	1	1				2	2		800000			3	5				3		1		3	1	1	2		1	1	1	2	2	4	2	2		2
10583	3	32	1	2	1	1	1		4	1			3	1	1				2	2		800000								3		1		5	1	2	2		1	1	1	2	2	3	2	1	2	1	1
438	3	33	2	1	2	1	1		3	1	1			2	3	1			2	1	2	800000								3		1		5	1	2	2		2	2	1	2	2	3	2	1	1	1	1
26	3	34	2	2	2	1	1		1	1			2	1	1				1	1	2	800000				4				3		1		3	1	2	2		1	1	1	2	2	3	2	1	1	1	1
997	4	41	2	3	2	1	1		1			2	1	2	1					2		800000		1		5				3		1		3	2	1	2		1	1	1	2	2	2	1	2	2	1	1
1015	4	42	2	3	2	1	1		1			2	1	2	1					2		800000		1		5				3		1		3	2	1	2		1	1	1	2	2	2	1		2	1	1
867	4	42	2	2	1	6	1		2				1		2					2		800000								3		1		3	1	2	2		1	1	2	2	2	3	2	1	1	1	1
1196	4	42	1	3	2	1	1		3			1								2		800000								3		1		2	2	2	2		1	1	1	2	2	2	2	2		2
1497	4	42	1	2	1	1	1		2					1						2		800000								3		1		1	2	2	2		1	1	1	2	1	4	2	2		1
4273	4	42	2	1	1	1	1		6	1	1	1						1		2		800000								3		2		1	1	2	2		1	1	1	2	2	3	2	2			2
5059	4	42	2	2	2	1	1		1	1	3	3	1							2		800000		2	3	4				3		1		5	1	1	2		1	1	1	2	2	5	2	2		2
113	4	42	2	2	2	1	1		2			1	1	1	1					2	2	800000				3				3		1		3	1	2	2		1	1	1	2	2	4	2	2		2
3152	4	42	1	1	2	1	1		2	1	1			1	1				2	1	1	800000								3		3		6	2	1	2		2	1	1	2	2	4	2	2		1	1
354	1	11	1	4	1	2	2		1	1	1	2	2	3	3	0	0	1	0	2		800000		14	4	4				3		2		4	1	1	2		1	1	1	2	2	2	1	1	1	2
10347	1	11	1	3	1	2	2		3										1	1	1	800000		1	1	30				3		1		4	1	1	2		1	1	1	2	1	3	2	1		1	1
10359	1	11	1	2	1	1	2		2	1	1	1								1	2	800000			3	4				3		1		4	1	2	2		1	1	1	2	2	3	2	1	2	1	1
144	1	13	1	5	1	1	2		6			2	2	1						1	1	800000				4				3		1		2	1	2	2		1	1	1	2	2	3	2	1	2	1	1
392	2	21	2	4	2	1	2		6			2		1	1							800000				4				3		1		4	2	2	2		1	1	1	2	2	4	2	1	1	1	1
360	2	21	2	2	2	2	2		6	1	1		2	1	1				2	1	2	800000				4				3		1		4	2	2	2		2	2	2	2	2	4	2	1	1	1	1
348	2	23	1	5	1	3	2		6	1	0	4	3	2	1	0	0	0	0	2		800000		1	3	12				3		2		3	2	2	2		1	1	1	2	2	3	2	2		1	1
338	2	23	2	4	1	4	2		1	2	0	0	1	3	2	0	0	1	0	2		800000								3		1		3	2	2	2		1	1	1	2	2	1	2	1	1	1	1
3173	2	23	1	5	1	2	2		6	2	1	2	2						2	1	1	800000			1	1	4			3		1		3	2	1	2		1	1	1	2	2	3	2	1	1	1	1
10862	2	23	1	1	1	1	2		1		1	2	2	3					1	1	2	800000								3		1		5	1	2	2		1	1	1	2	2	3	2	1		1	1
333	2	24	2	2	1	1	2		6	2	0	0	6	2	2	0	0	1	2	2		800000		2	8	20				3		1		5	1	1	2		1	1	1	2	2	2	1	1	1	1	1
298	2	25	1	3	1	2	2		2	0	2	4	2	2	4	0	0	2	0	2		800000		1	2	12				3		2		5	1	1	2		1	1	1	2	2	2	1	1	2	1	1
323	2	25	1	4	1	4	2		6			3		2	1					2		800000		2	3	4				3		2		4	2	1	2		1	1	1	2	2	2	1	1	2	1	1
10511	2	25	1	4	1	2	2		2	2	0	6	4	4	2	0	0	0	2	1	2	800000								3		1		5	1	2	2		1	1	2	2	2	3	1	1	1	1	1
11026	3	33	1	2	1	2	2		6	1	0	2	3	1	2	0	0	0	0	2		800000	0	1	2	4				3		1		4	1	1	2		1	1	1	2	2	3	2	1	1	1	1
68	4	42	1	5	1	2	2		6	1	2	3	1		2	1				1	1	800000								3		1		11	1	1	2		1	1	1	2	2	4	2	1	2	1	1
14078	1	12	1	3	1	2	4		2	1		1	1	1	1				2	1	1	800000		1	1	4				3		3	ZINC	4	1	1	2		1	1	1	2	2	3	1	1	1	1	1
3171	2	23	1	1	1	1	4		3	1	1	1	1						2	1	1	800000								3				5	1	2	2		2	2	2	2	2	2	2	1	1	1	1
3171	4	42	1	1	1	1	4		3	1	1	1	1						2	1	1	800000								3				5	1	2	2		2	2	2	2	2	2	2	1	1	1	1
440	4	42	1	3	1	2	4		2	1		1	1	1	1				2	1	1	800000								3		3		4	1	1	2		1	1	1	2	2	3	2	1	1	1	1
10321	2	24	1	1	1	5	5		3					1						2		800000								3		1		1	2	2	2		1	1	2	2	2	4	2	2		2
10322	2	24	1	1	4	5	5		2					1						2		800000								3		1		1	2	2	2		1	1	2	2	1	4	2	2		2
12078	2	25	1	2	1	1	5		3	1	0	0	0	1	1	0	0	0	0	2		800000	0	0	0	24				3		1		3	2	1	2		1	1	1	2	1	3	2	1	1	1	1
289	2	25	1	3	1	2	5		2	1	0	0	1	0	2	0	0	1	0	1	1	800000								3		1		4	1	2	2		1	1	2	2	1	2	2	1	2	1	1
4100	3	31	1	3	1	1	5		6	1	2	1	2							2		800000			3	4				3		1		3	1	2	2		1	1	1	2	1	2	2	1	2	1	1
4103	3	31	1	3	1	1	5		6	2	1	1	2							2		800000			3	4				3		1		3	1	2	2		1	1	1	2	2	2	2	1	2	1	1
4014	3	31	1	3	1	1	5		6	2	1	2	1							2		800000			3	4				3		1		3	1	2	2		1	1	1	2	1	2	2	1	2	1	1
11479	3	32	1	2	1	1	5		3	1	1	2							1	2		800000			3					3		1		3	1	2	2		1	1	1	2	1	2	2	2		2
125	3	34	1	2	1	1	5		2	1		1	1	1	1			0	1	1	2	800000								3		1		3	1	2	2		1	1	1	2	1	3	2	1	2	1	1
1518	4	42	1	4	1	5	5		2			2	1	1	1	1				2		800000				2				3		1		2	2	2	2		1	1	1	2	2	4	2	1	2	1	1
4100	4	42	1	3	1	1	5		6	1	2	1	2							2		800000			3	4				3		1		3	1	2	2		1	1	1	2	1	2	2	1	2	1	1
4103	4	42	1	3	1	1	5		6	2	1	1	2							2		800000			3	4				3		1		3	1	2	2		1	1	1	2	2	2	2	1	2	1	1
4014	4	42	1	3	1	1	5		6	2	1	2	1							2		800000			3	4				3		1		3	1	2	2		1	1	1	2	1	2	2	1	2	1	1
11188	2	24	1	4	1	1	6		3		2	4	2	2	3	1	1		1	1	2	800000				3				3		1		4	1	2	2		1	1	1	1	2	3	2	1	1	1	1
196	2	25	1	3	1	2	2		6	1	3	2	1	1	2	0	0	1	2	1	1	800000			4					3		1		6	1	1	2		1	1	1	2	2	1	1	1	5	1	1
18500	1	13	1	2	1	1	8	BICYCLE REPAIR	2		1	2								2		800000								3		1		2	2	2	2		1	2	2	2	2	2	1	1	3	1	2
18500	2	22	1	2	1	1	8	BICYCLE REPAIR	2		1	2								2		800000								3		1		2	2	2	2		1	2	2	2	2	2	1	1	3	1	2
4089	3	31	1	1	1	5	8	MECHANIC	3	1	1	1	2							1	2	800000				4				3		1		3	1	2	2		1	1	1	2	2	1	1	1	1	1	1
4089	4	42	1	1	1	5	8	MECHANIC	3	1	1	1	2							1	2	800000				4				3		1		3	1	2	2		1	1	1	2	2	1	1	1	1	1	1
10893	2	23	1	2	1	1	8	PHOTOGRAPHER	3			2	2	3	3			1		1	2	800000								3		1		5	1	2	2		1	1	1	2	1	3	2	2		2
10851	2	23	1	2	1	1	8	PHOTOGRAPHER	3	1	1	2	2						1	1	1	800000								3		1		4	1	2	2		1	1	1	2	1	3	2	1		1	1
10837	2	23	1	1	1	1	8	PHOTOGRAPHER	4	1	1	2	2	3	3			1		1	2	800000								3		1		4	1	1	2		1	1	1	1	1	3	2	1		1	1
10835	2	23	1	2	1	1	8	PHOTOGRAPHER	2	1	1	2	2						1	1	2	800000								3		1		5	1	1	2		1	1	1	2	1	3	2	1		1	1
408	2	25	1	1	1	1	2		3	1		2	2	4	1				1	1	1	820000								3		1		3	1	2	2		1	1	2	2	2	2	2	1	2	1	1
345	2	23	1	3	1	2	2		6	2	0	2	3	4	2	0	0	1	2	1	1	850000								3		2		4	1	2	2		1	1	1	2	2	2	1	1	2	1	1
10836	2	23	1	2	1	1	8	PHOTOGRAPHER	3	1	1	2	2	3	3				2	1	2	850000								3		1		4	1	1	2		1	1	1	2	1	1	2	1		1	1
970	2	25	2	1	3	5	7		4				2		1					2	2	860000								3		1		1	2	2	2		1	1	2	2	2	2	2	2		2	2
390	2	22	2	3	2	1	2		6		1	2		2	4			1	0	1	2	870000		2	4	7				3		1		4	1	1	2		1	1	2	2	2	1	1	1	2	1
399	2	25	2	3	1	2	1		3	0	1	2	0	2	4			0	0	1	2	880000		4	3	1				3		1		4	1	1	2		1	1	1	2	2	2	2	1	2	1	1
375	3	33	1	2	1	1	1		2		2	1		2	1			1	0	2		880000								3		1		3	2	2	2		1	1	1	2	2	2	2	1	2	1	1
290	2	25	1	2	1	1	8	DISABLE	3	0	1	1	2	1	1	0	0	0	1	2		880000								3		2		2	2	2	2		1	1	2	2	2	2	2	1	1	1	1
268	1	13	1	2	1	1	2		1		2	3	4	4	4			2	0	1	2	890000		2	4	3				3		1		4	1	2	2		1	1	2	2	2	4	2	2		1	1
176	1	13	1	3	1	4	1		1			2	1							2		900000		2	3	4				3		1		3	1	1	2		1	1	1	2	2	4	1	1	1	1	1
123	1	13	2	3	1	4	1		2		1	1						0	1	1	1	900000				4				3		1		2	1	2	2		1	1	1	2	2	2	1	1	1	1	1
3275	2	23	2	2	1	5	1		6	3	3								2	1	2	900000		2	3	4				3		1		4	1	1	2		1	1	1	2	2	2	1	1	1	2
403	2	24	2	3	1	1	1		3		2		1	2	2			0	0	2		900000		2	7	10				3		1		3	2	1	2		1	1	1	2	2	1	2	1	1	1	1
10312	2	24	2	1	1	1	1		1		1	1		1	1					1	2	900000		1		4				3		2		3	1	1	2		1	1	2	2	2	3	1	1	1	1	1
87	2	25	1	3	1	1	1			1			1	1	1					1	2	900000				4				3		1		3	1	1	2		2	1	1	2	2	3	2	2		2
216	3	34	1	2	1	1	1		2			1	2	2	2			1		1	2	900000		1	2	6				3		1		4	1	1	2		1	1	1	2	2	2		1	3	1	1
12037	3	34	1	2	1	1	1		2		1	1	1	2	2					1	2	900000		2	1	5				3		1		3	1	1	2		1	1	1	2	2	4	2	1	2	1	1
3275	4	42	2	2	1	5	1		6	3	3								2	1	2	900000		2	3	4				3		1		4	1	1	2		1	1	1	2	2	2	1	1	1	2
3155	1	11	1	3	1	2	2		2	2	1	1	2							1	1	900000			2	3	5			3		2		2	1	1	2		1	1	1	2	2	3	2	1	2	1	1
139	1	13	2	3	1	4	2		1			1	3							2		900000				4				3		1		2	1	2	2		2	1	2	2	2	3	1	1	1	1	1
347	2	23	1	3	1	2	2		2	0	0	1	1	3	2	0	0	1	0	2		900000		2	4	7	8			3		1		3	1	1	2		1	1	1	2	2	2	1	1	2	1	1
10857	2	23	1	2	1	1	2		3	1	1	2		3					1	1	2	900000								3		1		5	1	1	2		1	1	1	2	2	3	2	1		1	1
739	4	41	1	1	1	1	4		1	1	0	0	10	10	0	0	0	0	0	1	1	900000		1						3		1		2	1	2	2		1	1	1	2	2	2	2	1	1	2
263	1	11	1	2	1	6	5		1			3	3							2		900000								3		1		1	1	2	2		1	1	2	2	1	3	2	1	2	1	1
291	2	25	1	4	1	1	6		2	0	2	2	2	1	1	0	0	0	1	2		900000								3		1		3	2	2	2		1	1	1	1	2	2	2	1	2	1	1
10891	2	23	1	2	1	1	8	PHOTOGRAHPER	3			2	2	3	3			1		1	2	900000								3		1		6	1		2		1	1	1	1	1	3	2	1		1	1
10894	2	23	1	1	1	1	8	PHOTOGRAPHER	3	1	1			3	3				1	1	2	900000								3		1		6	1	1	2		1	1	1	2	1	3	2	1	1	1	1
10828	2	23	1	1	1	1	8	PHOTOGRAPHER	2	1	1	2	2	3	3			1	1	1	2	900000								3		1		6	1	1	2		1	1	1	2	1	3	2	1	1	1	1
10827	2	23	1	2	1	1	8	PHOTOGRAPHER	2			2	2							2		900000								3		1		7	1	2	2		1	1	1	1	1	3	2	2		2
11303	2	24	1	5	1		2													2		100000		1	1	6				3		1		2	1	2	2		1	1	1	2	2	3	2	2		2
1369	4	42	1	4	1	4	5															100000				1				3		1		2	2	2	2		2	1	1	2	2	4	2	2		2
529	1	11	2	3	1	1	1		6			1	1	1	1					2		100000								3		1		4	2		2		1	1	1	2	2	4	2	2			2
9	1	11	2	2	2	1	1		1	0	0	2	3	1	1	0	0	2	2	2		100000								3		1		1	1	2	2		1	1	1	2	2	4	2	1	2	1	1
10	1	11	1	2	1	1	1		1	0	0	3	1	1	1	0	0	0	0	2		100000				10				3		1		4	1	2	2		2	1	1	2	2	4	2	1		1	1
11	1	11	1	2	1	1	1		5	0	0	0	1	2	2	0	0	0	0	2		100000				4				3		1		1	1	2	2		1	1	1	2	1	4	2	1	1	1	1
2	1	11	1	1	2	1	1		1	0	0	2	0	0	4					1	2	100000		3		5				3		1		6	1	1	2		1	1	1	2	1	4	2	1	2	1	1
82	1	11	2	1	2	1	1		5	1	1	3	2	1	1					1	1	100000					4			3		1		4	1	1	2		1	1	1	2	2	4	2	1	1	1	1
3152	1	11	1	4	1	1	1		1	1	1	1	1	1				1	2	1	1	100000		2		5				3		1		4	1	1	2		1	1	1	2	2	3	2	1	1	1	1
10358	1	11	1	2	2	1	1		1					2	2				2	1	1	100000				4				3		1		4	1	2	2		2	2	2	2	2	3	2	1	2	1	1
11646	1	11	2	1	2	1	1			1			1	4	1					1	2	100000								3		1		3	1	1	2		1	1	1	2	2	4	2	1	1	1	1
11650	1	11	2	2	2	1	1		6				1	1	1					2		100000				10				3		1		1	2	2	2		1	1	1	2	2	4	2	1	1	1	1
11651	1	11	1	3	1	4	1		6			1	1	2	2					1	2	100000								3		1		4	2	2	2		1	1	1	2	2	4	2	1	1	1	1
11655	1	11	2	1	2	1	1		6		1	2	2	2	1					1	2	100000			2	7				3		1		3	1	1	2		1	1	1	2	2	4	2	1	1	1	1
11624	1	11	1	2	2	1	1		5		1	2	2	1	1					1	2	100000			1	3				3		1		3	1		2		1	1	1	2	2	4	2	1	2	1	1
11637	1	11	2	1	2	1	1		6			1	2	1	1					1	2	100000				4				3		1		2	1	2	2		1	1	1	2	2	3	2	2		2
11639	1	11	2	3	1	1	1		1			2	2	1	2					1	2	100000				6				3		1		3	2	2	2		1	1	1	2	2	4	2	1	1	1	1
11134	1	12	2	2	2	1	1		6		1	2	1							1	2	100000		3		7				3		1		2	1	1	2		1	1	1	2	2	4	2	1	1	1	1
3354	1	12	2	2	2	2	1		3	2	2									2		100000		2	3					3		2		4	1	1	2		1	1	1	2	2	1	1	1	2	1	2
14005	1	12	1	4	1	1	1		2	1	1	1	1	2	2			1		1	2	100000		1	1	2				3		3	ZINC	1	1	1	2		1	1	1	2	2	3	2	1	2	1	1
14009	1	12	2	3	2	4	1		6		1		1							1	1	100000								3		3	ZINC	3	2	1	2		1	1	1	2	2	3	2	2		1	1
449	1	13	1	3	1	1	1		2	1		2		1	2				2			100000				2				3		2		2	2	2	2			2	1	1	2	4	2	1	1	2
179	1	13	1	1	1	6	1		6	1	1		3							1	2	100000								3		1		1	2	2	2		1	1	2	2	2	3	2	2		2
148	1	13	1	3	1	1	1		1			3	1					1		1	2	100000				4				3		1		2	1	2	2		1	1	1	2	2	2	1	1	1	1	1
131	2	21	1	5	1	2	1		5				3	8	4				2	1	2	100000			3					3		1		5	1	1	2		1	1	1	2	2	4	2	2		2
1096	2	21	2	1	2	1	1		6		1	2								2		100000		2	4	8				3		1		4	1	1	2		2	1	1	2	2	3	2	2		1	1
313	2	21	1	2	1	1	1		6			1	1	1	2							100000				4				3		1		4	2	2	2		1	1	1	2	2	3	2	1	1	1	1
4268	2	21	2	4	1	4	1		1	2	3	5								2		100000				4				3		1		5	2	2	2		1	2	2	2	2	3	2	1	2	1	1
669	2	21	1	3	1	2	1		2		1	1	1	1	2			1		1	1	100000		1	1	3				3		2		4	1	1	2		2	1	2	2	2	2	2	1	2	1	1
10540	2	22	1	2	1	1	1		6	1		3	1	1	1				1	1	1	100000								3		1		7	1	1	2		1	1	1	2	1	3	2	2		2
14300	2	22	2	1	2	1	1		3			1						1		2		100000				4				3		1		1	1	2	2		1	1	1	2	2	3	2	1	1	1	1
4049	2	23	2	2	2	1	1		1	1	1	2	1	1					1	2		100000		2	3	4				3		1		6	1	1	2		1	1	1	2	2	4	2	2		2
5438	2	23	2	1	2	1	1		3	2	1	3								2		100000								3		1		3	1	2	2		1	1	1	2	2	2	1	1	1	1	1
5105	2	23	1	1	1	2	1		3	1	1	1	1	1					1	1	2	100000				4				3		1		5	1	1	2		1	1	1	2	2	4	2	2		2
10897	2	23	1	1	1	1	1		6	1	2	1	1	1	2			1	2	1	1	100000								3		1		4	1	1	2		1	1	1	2	2	2	1	1	2	1	1
968	2	25	2	5	2	6	1		6	1	3		2	2	1					1	2	100000		2	4	5				3		1		3	1	2	2		1	1	2	2	2	3	2	2		2	2
437	2	25	1	3	2	1	1		6	1		1	1	1						1	2	100000				4				3		1		6	1	2	2		1	1	1	2	2	3	1	1	1	1	1
265	2	25	2	2	1	6	1		6		2	3	1		1					1	2	100000				4				3		1		4	1	1	2		1	1	1	2	2	3	1	1	2	1	1
68	2	25	1	2	1	1	1		6		1	1	2	1	2			1		1	1	100000								3		2		3	1	2	2		1	1	1	2	2	4	2	1	2	1	1
11034	3	31	1	2	2	4	1		2	1	0	4	1	0	3	0	0	0	1	1	2	100000	0	0	0	3	0			3		1		6	1	1	2		2	1	2	2	2	2	1	1	3	1	1
11134	3	31	2	2	2	1	1		6		1	2	1							1	2	100000		3		7				3		1		2	1	1	2		1	1	1	2	2	4	2	1	1	1	1
10584	3	32	1	3	1	4	1		6			1	1	3	5					1	2	100000								3		1		4	1	1	2		1	1	1	2	2	3	2	1	1	1	1
166	3	33	1	2	2	1	1		1		2	2		3	2			0	0	1	2	100000				4				3		1			1	1	2		1	1	1	2	2	4	2	1	2	1	1
11042	3	33	2	2	1	1	1		6	0	1	1	2	1	1	0	0	0	0	2		100000	0	0	0	0				3		1		3	1	2	2		1	1	2	2	2	2	2	1	2	1	1
11034	3	33	1	2	2	4	1		2	1	0	4	1	0	3	0	0	0	1	1	2	100000	0	0	0	3				3		1		6	1	1	2		2	1	2	2	2	2	1	1	3	1	1
19	3	34	1	5	1	2	1		1		1	2	2		2	1			1	1	1	100000			2	2				3		1		3	1	2	2		1	1	1	2	1	3	2	1	4	1	1
51	3	34	1	2	1	1	1		2		1	2		1	2					1	2	100000				4				3		1		2	1	1	2		1	1	1	2	2	4	2	1	1	1	1
44	4	41	2	2	2	4	1		6			1	2	2	1					1	2	100000				10				3		1		3	1	1	2		1	1	1	2	2	3	2	1	2	1	1
54	4	41	2	2	2	1	1		6			2	2	1	2					1	1	100000			3	5				3		1		5	1	1	2		1	1	1	2	2	4	2	1	1	1	1
55	4	41	2	2	2	1	1		1		1	1	2	2	1					1	1	100000				4				3		1		4	1	2	2		1	1	1	2	2	4	2	1	1	1	1
1223	4	41	2	1	2	1	1		2	1		1								1	1	100000				3				3		1		4	1	1	2		1	1	1	2	1	4	2	1	1	1	1
686	4	41	1	3	1	2	1		1	1		1	1	1	3				1	2		100000				3				3		1		2	1	2	2		2	1	1	2	2	3	2	1		1	1
688	4	41	2	3	3	4	1		2				3	2	1					1	2	100000				5				3		1		3	1		2		1	1	1	2	2	4	2	1		1	1
9093	4	41	1	1	1	1	1		6			2	1	1	1					2		100000		1	4	2				3		1		3	1	1	2		1	1	1	2	1	4	2	1	2	1	1
411	4	42	1	2	3	1	1		2		1	1	2	2	2				1	1	1	100000				12				3		1		2	1	2	2		1	1	1	2	2	4	2	2		1	1
436	4	42	2	2	1	4	1		1			2			1					2		100000				4				3		1		1	1	2	2		1	1	2	2	2	1	1	1	1	1	1
1047	4	42	1	1	1	5	1		2											2		100000				2				3		1		1	2	1	2		1	1	2	2	2	1	2	1	1	1	1
859	4	42	2	2	2	1	1		6	1	1		2	1	1					1	1	100000		1						3		1		1	2	1	2			2	1	1	2	4	2	2		2
862	4	42	2	1	3	5	1		3		1	1	1	1	2					2		100000								3		1		2	2	2	2		1	1	2	2	2	4	2	2		2
61	4	42	1	1	1	1	1		1		2	1		1	2				1	1	1	100000								3		1		5	1	1	2		1	1	1	2	1	3	2	1	1	1	1
60	4	42	1	1	1	1	1		3		2		1	1	1					1	1	100000								3		1		3	1	1	2		1	1	1	2	2	3	2	1	1	1	1
80	4	42	2	2	2	1	1		1			2	3	2	1					2		100000								3		1		4	1	1	2		1	1	1	2	2	4	2	1	1	1	1
1473	4	42	1	2	3	1	1		1	0	1	1	2	0	1	1	1		1	2		100000								3		1		2	2	2	2		1	1	1	2	2	3	2	1	2	1	1
1474	4	42	2	3	2	1	1		6	0	10	20	10	10	10	10	0	1	2	2		100000	4							3		1		2	2	2	2		1	1	1	2	2	3	2	1	1	1	1
10746	4	42	2	3	1	4	1		1	0	0	1	2									100000								3		1		3	1	2	2		2	1	2	2	2	3	2	1	2	1	2
4494	4	42	1	3	1	2	1		5	2	3	2	1	4	3			1	1	1	1	100000		2	3	4	5			3		2		8	1	1	2		1	1	2	2	2	1	1	1	2	1	1
4268	4	42	2	4	1	4	1		1	2	3	5								2		100000				4				3		1		5	2	2	2		1	2	2	2	2	3	2	1	2	1	1
4049	4	42	2	2	2	1	1		1	1	1	2	1	1					1	2		100000		2	3	4				3		1		6	1	1	2		1	1	1	2	2	4	2	2		2
5438	4	42	2	1	2	1	1		3	2	1	3								2		100000								3		1		3	1	2	2		1	1	1	2	2	2	1	1	1	1	1
5105	4	42	1	1	1	2	1		3	1	1	1	1	1					1	1	2	100000				4				3		1		5	1	1	2		1	1	1	2	2	4	2	2		2
107	4	42	2	1	1	2	1		4				2	6	5	1				2	2	100000				4				3		1		7	1	1	2		1	1	1	2	2	4	2	2		2
1361	4	42	2	3	2	4	1		6				1		1					1	1	100000								3		3	ZINC	3	2	1	2		1	1	1	2	2	3	2	2		1	1
3029	4	42	1	4	1	1	1		2	1	1	1	1	2	2			1		1	2	100000								3		3		1	1	1	2		1	1	1	2	2	3	2	1	2	1	1
114	4	42	1	1	2	5	1		1		1									1	2	100000								3		1		1	2	2	2		1	1	2	2	2	2	2	2
14300	1	13	2	1	2	1	1		3			1						1		2		100000				4				3		1		1	1	2	2		1	1	1	2	2	3	2	1	1	1	1
560	1	11	1	2	1	2	2		6	1	1		2	2	1		1			1	1	100000		2		4				3		2		5	1	1	2		1	1	1	2	2	1	1	1	2	1	1
37	1	11	1	3	1	1	2		6	1	2	2	2	1	3	0	0	1	2	1	2	100000		3	4	4				3		1		5	1	2	2		1	1	1	2	2	4	2	1	1	1	1
10675	1	12	1	2	1	1	2		1		2	1	1						2	2		100000				4				3		1		4	1	2	2		2	1	1	2	2	3	2	2		2
11102	1	13	1	5	1	2	2		6			2	4		2			1	2	1	2	100000		7	5	11				3		1		7	1	1	2		1	1	1	2	2	4	1	1	4	1	1
62	1	13	1	1	1	1	2		6			2	1	1	1					2		100000		1	4	2				3		1		3	1	1	2		1	1	1	2	1	4	2	1	2	1	1
160	1	13	1	2	1	6	2		2			1	1							2		100000			3	4				3		1		1	1	2	2		1	1	1	2	2	3	2	2		2
342	1	13	1	5	1	5	2		6	1		2								2		100000				4				3		1		4	2	2	2		1	1	2	2	2	4	2	2		2
351	1	13	1	3	1	1	2		6	1		2	4	5	1				2	2		100000		2		4				3		1		4	1	1	2		1	1	1	2	2	2	2	2		2
10103	2	21	1	4	1	1	2		2	0	1	2	3	1	2				2	2		100000				2	3			3		1		3	1	2	2		1	1	1	2	2	3	2	2		1	1
312	2	21	1	2	1	1	2		1	1		1	1	2					2	2		100000				4				3		1		2	2		2		1	1	1	2	2	3	2	2
4494	2	21	1	3	1	2	2		5	2	3	2	1	4	3			1	1	1	1	100000		2	3	4	5			3		2		8	1	1	2		1	1	2	2	2	1	1	1	2	1	1
284	2	21	1	2	1	1	2		3		1	1		1	2					1	2	100000				18				3		2		4	2	2	2		2	1	2	2	2	2	1	1	1	1	1
359	2	21	2	1	3	1	2		6			1	2	3	1	1			2	1	2	100000		2		4				3		1		4	2	2	2		1	1	1	2	2	4	2	1	1	1	1
357	2	21	1	5	1	1	2		6					3	1	1	1					100000			2	4				3		1		5	2	2	2		2	2	2	2	2	4	2	1	1	1	1
259	2	23	1	2	1	1	2		6	1	1	2	2	3					1	1	2	100000								3		1		4	1	1	2		1	1	1	2	1	3	2	1	1	1	1
10922	2	23	1	2	1	1	2		6	1	1	2	2	3	3				1	1	2	100000								3		1		4	1	2	2		1	1	1	2	2	3	2	1	1	1	1
169	2	25	1	2	1	2	2		6	0	2	2	0	1	2	0	0	2	2	1	1	100000								3		1		3	1	2	2		2	2	1	2	2	3	2	2		2
10503	2	25	1	2	1	2	2		6	3	4	0	0	1	2	1	1	1		1	2	100000				11				3		1		5	2	2	2		2	2	2	2	2	2	2	1	4	1	1
57	2	25	1	3	1	2	2		1			2	2	1	1				1	1	1	100000				4				3		3	ZINC	6	1	1	2		1	1	1	2	2	3	2	1	1	1	1
10671	3	32	1	3	1	1	2		6	1	1	1								1	2	100000			3	2				3		1		3	1	1	2		1	1	1	2	2	4	2	1	1	2
10642	3	32	1	5	1	3	2		3		1	4	5	1						1	2	100000								3		1		4	1	2	2		1	1	1	2	2	2	1	1	3	2
168	3	33	2	3	2	1	2		6		1	1	2	4	3	3	2	1	2	2		100000				6				3		2		4	1	2	2		1	1	1	2	2	2	1	1	1	1	2
11013	3	33	1	2	1	1	2		6	0	1	1	1	1	0	0	0	1	0	1	1	100000	0	2	2	40				3		2		2	2	2	2		1	2	2	2	2	1	1	1	2	1	2
12080	3	33	1	3	1	1	2		5	0	0	1	2	1	1	0	0	0	0	2		100000	0	0	4	0				3		1		3	1	1	2		1	1	2	2	2	2	2	1	1	1	1
298	3	34	1	2	1	1	2		6		2	3		1	1		1	1		1	2	100000		2		4				3		2		3	1	1	2		1	1	1	2	2	4	1		2	1	1
109	3	34	1	2	1	2	2		6			1	4	1	2			0	0	1	2	100000				10				3		1		6	1	1	2		1	1	1	2	2	4	2	1	2	1	1
29	3	34	1	3	1	2	2		5			2	1	2	1					2	2	100000			2	4				3		1		4	2	2	2		1	1	1	2	2	3	2	1	2	1	1
48	4	41	1	3	1	1	2		5		1	2	1	2						1	1	100000			3	6				3		1		4	1	1	2		1	1	1	2	2	4	2	1	2	1	1
982	4	42	2	2	2	2	2		6		2	1		1	2			1		2		100000								3		1		4	2	2	2		1	1	1	2	2	3	2	2
86	4	42	1	4	1	1	2		6	2		2		1	1	1				1	1	100000				4				3		1		5	1	1	2		1	1	1	2	2	3	2	1	1	1	1
74	4	42	1	4	1	1	2		6			2	3	2	2						2	100000	8							3		1		5	1	1	2			1	1	2	2	3	2	1	1	1	1
63	4	42	1	2	1	2	2		6	1	3	4	3	2	2					1	1	100000			2	7				3		1		5	1	1	2		1	1	1			3	2	1	1	1	1
10756	4	42	1	2	1	1	2		1	1	1	1	1					2	2	2		100000				6				3		2		5	1	2	2		2	1	1	2	2	3	1	1	1	1	1
32	1	12	1	2	1	2	3		2		1	2	1	1	2	3				1	1	100000		4	6					3		1		3	1	2	2		1	1	1	2	2	4	2	1	2	1	1
99	3	34	2	1	3	5	3		1	2		2	2	1			1		1	1	1	100000				2				3		2		3	1	1	2		1	1	1	2	2	2	1	1	2	1	1
167	4	42	1	2	1	1	3		6		1	2	1	1	1					1	2	100000				6				3		1		1	1	2	2		2	1	1	2	2	2	2	2
32	4	42	1	2	1	2	3		2		1	1	1	1	1	1				2	1	100000		4	6	3				3		1		3	1	2	2		1	1	1	2	2	4	2	1	2	1	1
12	1	11	1	1	2	5	4		2	0	0	2	1	2	2					2		100000								3		1		3	1	2	2		1	1	1	2	2	4	2	1	1	1	1
663	1	11	1	2	2	5	4		1	1										2		100000								3		1		4	1	1	2		1	1	1	2	2	4	2	2		2
747	2	21	1	2	1	1	4		3			1	1	1						1	2	100000								3		1		1	2	2	2		1	1	1	1	1	3	2	1	1	1	1
552	2	25	1	1	3	5	4		6	0	0	1	1	3	2	0	0	0	0	2		100000								3		1		3	1	1	2		2	1	1	2	2	4	2	2
12246	3	33	1	4	1	1	4		5	0	1	2		1	1			0	0	2		100000								3		2		2	1	2	2		1	1	2	2	2	4	2	1	1	1	1
47	4	41	1	2	1	1	4		1		1	1	2	2	1					1	2	100000				9				3		1		4	1	1	2		1	1	1	2	2	3	2	1	1	1	1
744	4	41	1	2	1	3	4		1			1								2		100000								3		1		2	1	2	2		1	1	1	2	2	3	2	2
760	4	42	1	4	1	1	4		2				1	1	1					2		100000		1						3		1		2	1		2		1	1	1	2	2	4	2	1	1	1	1
164	1	11	1	1	3	5	5		3											2		100000				4				3		1		1	1	1	2		1	1	1	2	1	4	2	1	1	1	1
561	1	12	1	1	4	1	5		6	1		2	1	2		1			1	1	2	100000								3		1		4	2	2	2		2	1	1	2	2	2	1	1	1	1	1
153	1	13	1	1	1	1	5		2	1		1								2		100000				4				3		1		1	1	2	2		1	1	1	2	1	3	2	2		2
11144	2	24	1	2	1	1	5		2		1	2	1	1	2	1				1	1	100000			5	10				3		1		4	1	1	2		1	1	1	2	2	3	2	1	4	1	1
264	1	11	1	2	1	1	6		3										1	1	1	100000								3		1		7	1	1	2		1	1	1	1	2	3	2	2		2
3122	1	12	1	1	1	2	6		2	1	1	1	1	1						2		100000		2	3					3		1		4	1	1	2		1	1	1	2	2	4	1	1	1	1	1
1211	4	41	2	3	1	4	6		1			1	1	1	1					2		100000				1				3		2		2	2	2	2		2	1	2	2	2	2	2	1	1	1	1
114	4	42	1	1	2	5	6		1		1									1	2	100000								3		1		1	2	2	2		1	1	2	2	2	2	2	2
10765	2	23	2	1	3	5	7		3		1	2	1	3	4			2	3	1	1	100000				4				3		1		4	1	1	2		1	1	1	2	2	2	1	1	2	1	1
14100	3	33	1	1	3	5	7		4	4	2	0	1	0	2	1	0	0	0	1	1	100000	0	0	0	7				3		1		4	1	1	2		1	1	1	2	2	4	2	1	2	1	1
10752	4	42	2	1	1	2	4		1			1		1					2	2		100000								3		1		1	2	2	2		1	1	2	2	2	2	2	1	1	1	1
4020	1	13	1	1	1	1	8	CARPENTER	2	1	1	1								2		100000								3		1		4	1	2	2		1	1	2	2	2	3	2	1	1	1	1
95	1	13	1	5	1	2	8	CHIEF	3			1	1	3	1					1	1	100000		3	2	7				3		1		6	1	1	2		1	1	1	2	2	5	1	1	4	1	1
1458	4	42	1	2	1	1	8	CONTRACTOR	6	0	2	1	0	0	0	0	1	0	1	1	2	100000		1		2				3		2		2	2	2	2		1	1	1	1	1	2	1	1		1	1
12055	2	23	1	2	1	1	8	DISABLE	2	1	1	2	1	1	1	0	0	0	1	1	2	100000	0	0	0	4				3		1		3	1	2	2		1	1	1	2	2	2	1	1	1	1	1
12055	3	33	1	2	1	1	8	DISABLE	2	1	1	2	1	1	1	0	0	0	1	1	2	100000	0	0	0	4				3		1		3	1	2	2		1	1	1	2	2	2	1	1	1	1	1
10885	2	23	1	2	1	1	8	PHOTOGRAPHER	4			2	2							2		100000								3		1		7	1		2		1	1	1	1	1	3	2	1	1	1	1
10840	2	23	1	1	1	1	8	PHOTOGRAPHER	4	1	1	2	2	3					1	1	2	100000								3		1		4	1	2	2		1	1	1	1	1	3	2	1	1	1	1
10834	2	23	1	2	1	1	8	PHOTOGRAPHER	3	1	1	2	2	3	3				1	1	2	100000								3		1		4	1	2	2		1	1	1	2	1	3	2	1		1	1
10831	2	23	1	1	1	1	8	PHOTOGRAPHER	2	1	1	2	2						2	1	2	100000								3		1		4	1	1	2		1	1	1	2	1	3	2	1		1	1
10830	2	23	1	2	1	1	8	PHOTOGRAPHER	2	1	1	2	2	3	3				2	1	2	100000								3		1		4	1	1	2		1	1	1	1	1	3	2	1		1	1
10826	2	23	1	1	1	1	8	PHOTOGRAPHER	2			2	2							2		100000								3		1			1		2		1	1	1	2		3	2	2		2
11047	3	33	1	2	1	1	8	SHOE MAKER	6	0	0	0	0	2	1	1	1	0	0	2		100000	1	2	4	10				3		2		1	2	2	2		2	1	2	2	2	1	1	1	1	1	2
335	2	21	1	5	1	1	8	TEACHER	4			2	2			1	1					100000				4				3		1		2	2	2	2		1	1	1	2	2	4	2	2
2206	4	42	1	1	1	1	8	WELDER	2	1		1	1	1	1				2			100000				4				3		1		1	2	2	2		1	1	1	2	2	3	2	1	1	1	1
1430	4	41	2	1	1	5	8	WOOD CUTTING	6	1					2				2	1	1	100000								3		1		2	1	2	2		1	1	1	2	2	2	2	2		2	2
18900	1	12	2	2	2	1	1		1	1	1								1	1	1	110000								3		1		2	2	2	2		2	1	1	2	2	3	2	1	2	2
18900	2	22	2	2	2	1	1		1	1	1								1	1	1	110000								3		1		2	2	2	2		2	1	1	2	2	3	2	1	2	2
391	2	22	2	2	1	1	1		2			1	1	1	1			0	0	1	2	115000								3		1		2	1	2	2		1	1	2	2	2	2	1	2		2	2
3312	1	11	2	2	1	5	1		6	1	2	1							2	2		120000			3	4				3		1		5	1	2	2		1	1	1	2	2	2	2	2		2
187	1	11	2	2	2	1	1		2		1		1						2	1	2	120000				4				3		1		2	2	2	2		1	2	2	2	2	3	2	1	1	2
4034	1	12	1	1	2	1	1		3	2	2	1						1	1	2		120000				3				3		1		3	1	1	2		1	1	1	1	2	4	2	1	1	1	1
19300	1	12	2	3	2	1	1		1			2								2		120000								3		1		4	1	2	2		1	1	1	2	2	4	2	1	1	1	1
19300	2	22	2	3	2	1	1		1			2								2		120000								3		1		4	1	2	2		1	1	1	2	2	4	2	1	1	1	1
309	2	23	1	2	1	1	1		6	1		1	2	1	1				1	2		120000								3		1		3	2	2	2		1	1	1	2	1	2	1	1	1	1
545	2	25	2	4	1	4	1		6	0	1	1	3	1	3	0	0	0	0	1	2	120000								3		1		2	2	2	2		1	1	2	2	2	3	2	2		1	1
1019	4	42	2	3	1	3	1		1	1	1		1		2				1	1	2	120000				2				3		1		6	2	2	2		1	1	1	2	2	3	2	1	3	1	1
3001	1	12	1	2	1	1	2		1	1	1	2							1	1	2	120000				4				3		1		4	1	1	2		1	1	1	2	2	3	2	1	1	1	1
1105	1	12	1	2	1	1	2		6			1	3	1	3					2		120000				7				3		1		4	1	1	2		1	1	1	2	2	5	2	1	1	1	1
46	1	13	1	2	1	1	2		6			1	3	1	3					2		120000				7				3		1		4	1	1	2		1	1	1	2	2	5	2	1	1	1	1
10921	2	23	1	2	1	1	2		6	1	1	2	1	1	1			1	2	1	1	120000								3		1		4	1	1	2		1	1	1	2	2	2	1	1	2	1	1
21	3	34	1	5	1	2	2		4			4	1	2	2	1				1	1	120000								3		1		5	1	2	2		1	1	1	2	2	3	2	1	4	1	1
656	1	11	2	3	2	4	3		6	1	2	2	1						1	1	2	120000				4				3		1		5	1	1	2		1	1	1	2	2	4	2	1	1	1	1
22	2	21	1	1	1	4	5		2		1			1	1					2	2	120000								3		1		7	1	2	2		1	1	1	2	2	4	2	1	1	1
261	2	24	1	2	1	1	1		2	1	0	2	1	0	1	1	0	1	1	2		135000			3	4				3		1		4	1	2	2		1	1	1	2	2	4	2	1	2	1	1
10333	1	11	2	2	2	1	1		6	2		2							2	1	1	140000								3		1		1	1	1	2		1	1	1	2	2	3	1	1	2	1	1
14800	2	22	2	2	2	1	1		1				4	3	2					2		140000				4				3		1		3	1	2	2		1	1	1	2	2	3	2	2		2
15000	2	22	2	3	2	4	1		5				1	2	3					2		140000								3		1		2	2	2	2		1	1	1	2	2	3	2	1	2	1	1
14800	1	13	2	2	2	1	1		1				4	3	2					2		140000				4				3		1		3	1	2	2		1	1	1	2	2	3	2	2		2
15000	1	13	2	3	2	4	1		5				1	2	3					2		140000								3		1		2	2	2	2		1	1	1	2	2	3	2	1	2	1	1
203	2	24	1	2	1	2	2		2	1	1	2	3	3	2	0	0	0	2	1	1	140000		2	3					3		1		9	1	1	2		1	1	1	2	2	1	1	1	3	1	1
158	2	25	1	2	1	1	2		6	1	1	2	3	3	2	0	0	0	2	1	1	140000		2	3					3		1		6	1	1	2		1	1	1	2	2	1	1	1	3	1	1
3363	1	11	2	2	2	3	4		3	2	2	1	1	1						2		140000			3	1				3		2		3	2	2	2		1	1	1	2	2	2	2	2		1	1
466	3	34	1	2	1	1	8	MECHANIC	5		1	1	1	1	1			1		1	2	140000		1	1	3				3		1		2	1	2	2		1	1	1	2	1	4	2	1	3	1	1
3	1	11	1	1	1	1	1		4	0	0	2	1	2	3	0	0	1		2		150000								3		1		3	1	2	2		1	1	1	2	2	4	2	2		2
27	1	11	2	1	2	1	1		2	0	2	1	1	1	1					1	2	150000				5				3		1		1	2	2	2		1	1	1	2	2	4	2	1	1	1	1
20	1	11	1	1	1	1	1		3	0	0	0	0	2	1	0	0			2		150000				3				3		1		3	1	2	2		1	1	1	2	2	4	2	2		2
5336	1	11	2	3	2	2	1		4	1	2	1	1	2	2					1	1	150000		2	2	2				3		1		3	2	2	2		1	1	1	2	2	2	2	2		2
4023	1	11	2	2	2	2	1		6	1	2	1	1	1	1				1	1	2	150000				4				3		1		5	1	1	2		1	1	1	2	2	3	2	1	2	1	1
5042	1	11	1	5	1	2	1		6	2	2	2						1		1	2	150000		1	2	25				3		1		3	1	1	2		1	1	1	2	2	4	2	1	4	1	1
5045	1	11	1	2	1	1	1		1	1	1								1	2		150000			3					3		1		1	2	2	2		2	2	2	2	2	3	2	1	1	1	1
3360	1	11	2	4	1	3	1		6	4	1	2	1	1	3				2	1	1	150000		2	2	2				3		1		3	2	2	2		1	1	1	2	2	2	2	2		2
660	1	11	1	1	1	1	1		1	3	1	1							1	2		150000			3	4				3		1		6	1	1	2		1	1	1	2	2	3	2	1	5	1	1
204	1	11	1	1	3	5	1		1		1		2						2	1	1	150000								3		1		5	1	2	2		2	1	2	2	2	3	2	1	2	1	1
289	1	11	2	1	1	1	1		6			2	3						2	1	2	150000				4				3		1		2	1	1	2		1	1	1	2	1	3	2	1	1	1
11652	1	11	2	2	1	4	1		6		1	1		1	2					1	2	150000				2				3		1		3	2	2	2		1	1	1	2	2	4	2	1	1	1	1
11658	1	11	2	1	2	1	1		6			3	4	2	1					1	2	150000								3		1		4	2	1	2		2	1	1	2	1	4	2	2		2
11544	1	11	1	2	1	1	1		2			2	1	1	1					2		150000				2				3		1		2	1		2		1	1	1	2	2	5	2	2		2
13634	1	11	2	1	2	1	1		1		1	2	1	2						1	2	150000				3				3		1		3	1	2	2		1	1	1	2	2	4	2	2		2
11636	1	11	2	1	2	1	1		5		1	2	2	1	1					1	2	150000				2				3		1		3	1	2	2		1	1	1	2	2	4	2	2		2
11638	1	11	2	2	2	1	1		6			1	2	2	1					1	2	150000								3		1		3	1	2	2		1	1	1	2	2	4	2	1	1	1
297	1	12	1	3	2	1	1		1	1	2	1						1		2		150000		2						3		1		3	1		2		1	1	1	2	2	3	2	2		2
290	1	12	1	2	2	1	1		1	2	1	2	1							2		150000		1	2	3				3		1		4	1	1	2		1	1	1	2	2	2	2	2		2
536	1	12	2	2	1	2	1		6	1	1	1	1						1	1	2	150000				3				3		1		5	1	1	2		1	1	1	2	2	4	1	1	2	1	1
19901	1	13	2	2	2	1	1		6	1		2	2	1	1					1	2	150000				1		6	DUCKS 10	3		1		2	1	1	2		1	1	1	2	2	4	1	2		2
17	1	13	1	1	1	1	1		6			1	2	1	1					1	1	150000				20				3		1		2	1	2	2		2	2	2	2	2	5	2	2		2
1087	2	21	2	2	1	1	1		6		1	2	1					1			2	150000				10				3		1		5	1	2	2		2	1	2	2	2	4	2	1	1	1	1
490	2	21	2	2	2	2	1		5	1		2			1	1		1		1	1	150000			3	4				3		1		2	1	1	2		1	1	1	2	2	4	2	1	2	1	1
908	2	21	2	1	4	5	1		3			4	4	1				1		1	1	150000				4		6	DUCKS 6	3		1		4	1	2	2		1	1	1	2	2	3	2	1	1	1	1
589	2	22	1	2	1	1	1		6	1	0	0	0	1	1	0	0	1	2	2		150000								3		1		2	2	2	2		2	1	1	2	2	3	2	1	1	1	1
13800	2	22	2	1	1	5	1		2		1							1		2		150000								3		1		2	1	2	2		1	1	1	2	2	3	2	1	1	1	1
3420	2	23	2	2	2	1	1		2	1	1	2	1	1						2		150000		2						3		1		3	1	1	2		1	1	1	2	2	3	2	1	2	1	1
10780	2	23	1	3	1	1	1		6			4	2	1	1					1	2	150000		2	3					3		2		5	1	1	2		1	1	1	2	2	3	2	1	2	1	1
12207	2	24	2	2	2	1	1		6	0	1	2	0	0	1	1	0	0	0	1	2	150000			1	2				3		1		3	1	1	2		2	1	1	2	2	3	2	1	2	1	1
12210	2	24	1	2	2	2	1		3		1	0	1	2	4	2		0	0	1	1	150000			5	8				3		1		4	1	1	2		1	1	1	2	2	3	2	1	3	1	1
11127	2	24	2	4	1	3	1		2				1	3	2					1	1	150000			6					3		1		5	1	1	2		1	1	1	2	2	3	2	1	2	1	1
10997	2	24	1	1	2	1	1		2	2		1								1	2	150000				4				3		3	ZINC	3	1	2	2		1	1	1	1	2	3	2	2		2
1	2	25	1	1	3	5	1		2					1	1					2		150000								3		1		1	2	2	2		1	2	1	2	2	4	2	2		2
1460	3	31	2	1	4	3	1		3	2	4	2	1	1				1		1	1	150000				4		6	DUCKS 14	3		1		4	2		2		1	1	1	2	2	3	2	1	1	1	1
849	3	31	2	3	1	4	1		6	1	3	1	2							2		150000			3	4				3		2		3	1	2	2		1	1	1	1	1	2	2	1	2	1	1
11046	3	33	2	2	2	4	1		6	0	0	0	2	1	1	0	0	0	1	2		150000	1	2	1	5				3		2		2	2	2	2		2	1	1	2	1	1	1	1	1	1	2
12149	3	33	2	2	2	4	1		2			1	1	2				0	0	2		150000				6				3		1		2	1	1	2		1	1	2	2	2	3	2	1	1	1	1
12207	3	33	2	2	2	1	1		6	0	1	2	0	0	1	1	0	0	0	1	2	150000			1	2				3		1		3	1	1	2		2	1	1	2	2	3	2	1	2	1	1
12247	3	33	1	4	1	1	1		6		0	1	2	2	1	1	0	0	0	2		150000								3		2		3	2	2	2		1	1	2	2	2	3	2	1	1	1	2
19901	3	33	2	2	2	1	1		6	1		2	2	1	1					1	2	150000				1		6	DUCKS 12	3		1		2	1	1	2		1	1	1	2	2	4	1	2		2
374	3	34	1	2	1	2	1		6			2	1		1		1			2		150000		3		4				3		1		5	1	1	2		1	1	1	2	2	2	1	1	2	1	1
451	3	34	2	3	2	3	1		1			1	2		3					1	2	150000				8				3		1		2	2	1	2		2	1	1	2	2	3	2	1	1	1	1
122	4	41	1	1	1	1	1		3	2				1	1			1	1	2		150000				4				3		1		5	1	1	2		1	1	1	2	2	3	2	2		2
9062	4	41	1	1	1	1	1		6			1	2	1	1					1	1	150000				20				3		1		2	1	2	2		2	2	2	2	2	5	2	2		2
1001	4	41	1	2	1	1	1		1		2			1	1					1	1	150000			3	7				3		1		2	1	1	2		1	1	1	2	1	5	2	1	1	1	1
467	4	42	2	2	2	1	1		6			2	1	1	1					1	2	150000								3		1		2	1	2	2		1	1	1	2	2	2	2	2		2	2
437	4	42	1	3	1	5	1		1					1						2		150000								3		1		1	2	2	2		1	1	1	2	2	1	2	2		1	1
3445	4	42	1	2	1	4	1		2	0	0	1	1	0	0	0	0	0	0	1	2	150000								3		1		1	1	2	2		1	1	2	2	2	3	2	2		2
83	4	42	2	2	2	1	1		1		1	1	3	2	1					1	1	150000								3		1		4	1	2	2		1	1	1	2	2	4	2	1	1	1	1
997	4	42	2	5	1	4	1		6			1	2	1	1				2	1	2	150000								3		1		1	2	2	2		1	2	2	2	2	4	1	2
490	4	42	2	2	2	2	1		5	1		2			1	1		1		1	1	150000			3	4				3		1		2	1	1	2		1	1	1	2	2	4	2	1	2	1	1
908	4	42	2	1	4	5	1		3			4	4	1				1		1	1	150000				4		6	DUCKS 6	3		1		4	1	2	2		1	1	1	2	2	3	2	1	1	1	1
1460	4	42	2	1	4	3	1		3	2	4	2	1	1				1		1	1	150000				4		6	DUCKS 14	3		1		4	2		2		1	1	1	2	2	3	2	1	1	1	1
849	4	42	2	3	1	4	1		6	1	3	1	2							2		150000								3		2		3	1	2	2		1	1	1	1	1	2	2	1	2	1	1
951	4	42	1	2	1	1	1		6	1	2	1								1	2	150000				4				3		1		2	1	2	2		1	1	2	2	2	2	2	1	1	1	1
3420	4	42	2	2	2	1	1		2	1	1	2	1	1						2		150000		2						3		1		3	1	1	2		1	1	1	2	2	3	2	1	2	1	1
3132	4	42	2	1	3	5	1		3	1										1	2	150000				2				3		1		4	1	2	2		1	1	1	2	2	3	2	1	1	1	2
13800	1	12	2	1	1	5	1		2		1							1		2		150000								3		1		2	1	2	2		1	1	1	2	2	3	2	1	1	1	1
3280	1	11	2	3	2	2	2		2	2	2							1		2		150000				4				3		2		3	1	1	2		1	1	1	2	2	2	2	2		2
10673	1	12	1	1	1	1	2		3		2											150000			4					3		1		3	1	1	2		1	1	1	2	2	3	2	2		2	2
11500	1	12	1	2	1	1	2		6		1	1							2	2		150000			3					3		3		3	1	1	2		2	1	1	2	2	3	2	1	3	1	1
3082	1	13	2	2	1	2	2		6	1	1	1						1		2		150000								3		1		4	1	1	2		1	1	1	2	2	4	2	1	1	1	1
70	1	13	1	2	1	1	2		1		2			1	1					1	1	150000			3	7				3		1		2	1	1	2		1	1	1	2	1	5	2	1	1	1	1
206	1	13	1	1	1	2	2		6		2	1	3	1	1	1			2	1	2	150000				15				3		1		4	1	2	2		1	1	1	2	2	3	1	1	1	1	1
11500	2	22	1	2	1	1	2		6		1	1							2	2		150000			3					3		3		3	1	1	2		2	1	1	2	2	3	2	1	3	1	1
3132	2	23	2	1	3	5	2		3	1	2									1	2	150000				2				3		1		4	1	2	2		1	1	1	2	2	3	2	1	1	1	2
260	2	23	1	2	1	1	2		6	1		2	2	3	3				1	1	2	150000								3		1		5	1	1	2		1	1	1	2	1	3	2	1	2	1	1
10379	2	23	1	1	1	5	2		2			1		2	1					2		150000								3		1		5	1	2	2		1	1	1	2	2	2	1	2		2
10920	2	23	1	2	1	1	2		6	1	2	1	1	1	2	1		1	2	1	1	150000								3		1		5	1	1	2		1	1	1	2	2	2	1	1	1	1	1
10919	2	23	1	2	1	1	2		6	1	2	1	1	2	1	1		1	2	1	1	150000								3		1		5	1	1	2		1	1	1	2	2	2	1	1	1	1	1
10918	2	23	1	1	1	1	2		6	1	2		2		1		1	1	2	1	1	150000			3					3		1		4	1	1	2		1	1	1	2	2	2	1	1	2	1	1
10915	2	23	1	2	1	1	2		6	1	2	1	1	1	1			1	1	1	1	150000								3		1		4	1	1	2		1	1	1	2	2	2	1	1	2	1	1
10913	2	23	1	1	1	1	2		6				1	2	1		1	1	2	1	1	150000								3		1		4	1	1	2		1	1	1	2	2	2	1	1	2	1	1
10882	2	23	1	1	3	5	2		5			2	1	1	1					1	1	150000								3		1		3	1	2	2		1	1	1	2	2	3	2	1	1	1	1
10842	2	23	1	2	1	1	2		1			2	1	1	1					1		150000			3	4				3		2		3	1		2		1	1	1	2	2	3	2	1	2	1	1
425	2	25	1	2	3	1	2		6	2			3	1	2	1		1		2		150000								3		1		5	1	2	2		1	1	1	2	2	3	2	1	2	1	1
436	2	25	1	3	1	1	2		6		1	3	2	1						2		150000			3					3		1		1	1	1	2		1	1	1			4	2	1	2	1	1
59	2	25	1	3	1	2	2		1	1	1	1	2	2	1			1	1	1	1	150000				4				3		3	ZINC	4	1	1	2		1	1	1	2	2	3	2	1	1	1	1
64	2	25	1	2	1	1	2		6	1		2	2	1	1				1	2		150000				4				3		3	ZINC	5	1	2	2		1	1	2	2	2	3	2	1	1	1	1
11038	3	31	1	2	1	1	2		5	1	1	2	2	1	1	0	0	0	0		2	150000	0	1	2	3				3		1		3	1	1	2		1	1	1	2	2	3	2	1	1		1
951	3	31	1	2	1	1	2		6	1	2	1								1	2	150000				4				3		1		2	1	2	2		1	1	2	2	2	2	2	1	1	1	1
10652	3	32	1	1	1	1	2		5	1	1									1	2	150000		7						3		2		4	1	1	2		1	1	1	2	2	2	2	1	1	2
11038	3	33	1	2	1	1	2		5	1	1	2	2	1	1	0	0	0	0		2	150000	0	1	2	3				3		1		3	1	1	2		1	1	1	2	2	3	2	1	1		1
12235	3	33	1	3	1	1	2		2			3	2	1	1			0	0	2		150000								3		2		1	2	2	2		1	1	2	2	2	3	2	1	1	1	1
204	3	34	1	2	1	2	2		1	1		8		1	1			1		1	2	150000				1				3		1		4	1	2	2			1	1	2	2	2	1	1	2	1	1
135	4	41	1	4	1	2	2		5	1	0	0	2	6	3							150000			3					3		2		5	2	1	2		1	1	2	2	2	3	2	2		2
427	4	42	2	3	2	1	2		6		1	2		1	1					2		150000				12				3		1		2	1	1	2		1	1	1	2	2	5	2	1		1	1
351	4	42	2	2	2	1	2		6	1	1	1	1							2		150000								3		1		3	2	2	2		1	1	2	2	2	2	2	1	2	1	1
445	1	13	2	3	1	4	3		6			1	2		3					2		150000								3		2		1	2	2	2			2	1	1	2	3	2	2
12237	2	24	1	2	2	1	3		1	1		2	1	2				0	0	2		150000		2	1	1				3		2		4	1	2	2		2	1	1	2	2	3	2	1	1	1	1
11370	3	32	1	1	1	5	3		1					1				0	0	2		150000	0	0	0	0				3		1		1	2	2	2		2	1	1	2	2	4	2	2		2
13	3	33	1	2	1	1	3		2			6	2	1	1	1	1			2		150000			3					3		1		3	1	2	2		1	1	1	1	2	2	2				2
1269	4	41	1	2	1	5	3		5	0	0	3	3	1	1	0	0			2		150000								3		1		2	2	2	2		2	1	2	2	2	3	2	2		2
1295	4	41	1	1	3	5	3		1			2	2	2	2					2		150000				4				3		1		3	2	2	2		1	1	1	2	2	3	2	1	1	1	1
1301	4	41	1	3	1	1	3		1			2	3	2	1					2		150000				3				3		1		2	2	2	2		1	1	1	2	2	3	2	2
11628	1	11	1	3	1	1	4		6		1	1	2	2	2					1	2	150000				7				3		1		4	1	1	2		1	1	1	2	1	4	2	1	2	1	1
11630	1	11	1	3	1	1	4		1		1	2	2	2	1					1	2	150000			2	4				3		1		4	1	2	2		1	1	1	2	1	4	2	1	2	1	1
109	1	13	1	2	1	1	4		2	1		2	1					1		2		150000				4				3		1		3	1	1	2		1	1	1	2	2	2	2	2		2
328	1	13	1	5	1	6	4		6		2	2	1		1	1			2	1	2	150000				4				3		1		4	1	1	2		2	1	1	2	2	2	1	1	4	1	1
12179	2	24	1	4	2	1	4		5	1	1	2	2	3	1	0	0	0	2	1	2	150000	0	2	0	0				3		1		4	1	1	2		1	1	1	2	2	4	1	2		2
128	2	25	1	1	1	1	4		3	1				1						1	2	150000								3		1		4	1		2		2	1	1	2	2	4	2	1	1	2
12179	3	33	1	4	2	1	4		5	1	1	2	2	3	1	0	0	0	2	1	2	150000	0	2	0	0				3		1		4	1	1	2		1	1	1	2	2	4	1	2		2
97	3	34	1	3	1	1	4		2	1			1	1	1			0	1	1	1	150000				7				3		2		3	2	1	2		1	1	1	2	2	1	2	1	2	1	1
45	4	41	1	2	1	1	4		5			2	1	1	1					1	1	150000								3		1		3	1	1	2		1	1	1			4	2	1	1	1	1
762	4	42	1	2	1	2	4		2			1		1	1			1				150000								3		1		2	1		2		1	1	1	2	1	3	2	1	2	1	1
5332	1	11	2	2	2		5		2	2	1	2	1	1				1		1	1	150000		2	2	1				3		1		2	2	2	2		1	1	1	2	2	1	2	2		2
3253	1	12	2	2	1	1	5		2	1	1									2		150000		2	3					3		3		4	1	1	2		1	1	1	2	2	1	1	1	1	1	2
11273	1	13	1	1	1	1	5		1	1		1	3	1	1				1	1	1	150000								3		1		1	1	2	2		1	1	1	2	1	5	2	1	1	1	1
70487	2	24	1	2	1	1	5		6	1	1	1	1							2		150000			3	4				3		1		3	1	1	2		1	1	2	2	2	3	2	1	2	1	1
568	2	25	1	1	4	5	5		3	1	2	1	1	3	1	0	0	0	1	1	2	150000			2	16				3		1		5	2	2	2		1	1	1	2	2	2	2	1	4	1	1
39	2	25	1	2	1	1	5		6	1	1		1	2	1				2	2		150000								3		1		2	1	1	2		1	1	1	2	1	3	2	1	1	2
217	3	34	1	1	1	1	5		2	1		1		1	1	1			1	1	2	150000								3		1		4	1	2	2		1	1	1	2	1	4	1	1	2	1	1
111	3	34	1	4	1	2	5		5	1			1	3	2			0	0	2		150000				24				3		1		4	1	1	2		1	1	1	2	1	3	2	2	2	1	1
10529	4	41	1	2	1	2	5		5			1	0	0	0	0	2	1	2	1	1	150000			2					3		3	ZINC	3	1	1	2		1	1	1	2	1	1	1	1	2	1	1
70487	4	42	1	2	1	1	5		6	1	1	1	1							2		150000			3	4				3		1		3	1	1	2		1	1	2	2	2	3	2	1	2	1	1
3349	1	11	1	2	1	1	6		5											2		150000				4				3		1		7	1	1	2		1	1	1	1	2	2	2	2		2
3112	1	12	1	4	1	6	6		3	2	2	1								2		150000								3		1		2	1	2	2		1	1	1	1	2	3	2	1	1	1	1
14002	1	12	1	1	1	1	6		1	1				1	1					1	1	150000								3		3	ZINC	1	1	1	2		2	1	1	2	1	4	2	2		1	1
18100	1	13	1	3	1	1	6		3				2	2	1					2		150000								3		1		4	1	2	2		1	1	1	2	1	4	2	2		1
6	1	13	1	2	1	1	6		6	1			2	1	1					2		150000				5				3		1		2	1	1	2		1	1	1	2	1	5	1	1	1	1	1
18100	2	22	1	3	1	1	6		3				2	2	1					2		150000								3		1		4	1	2	2		1	1	1	2	1	4	2	2		1
10374	2	24	1	1	1	2	6		2	1			1	2	1					1	2	150000								3		1		2	1	1	2		1	1	1	1	2	4	2	1	1	2
10373	2	24	1	1	1	2	6		3	1			1	3	2					1	2	150000				4				3		1		3	1	1	2		1	1	1	2	2	2	2	1	1	2
14017	1	12	1	1	3	5	7		2		7		7	1	1					2		150000				1				3		3	ZINC	1	1	2	2		1	1	2	2	2	2	2	1	2	1	1
214	3	34	1	2	1	5	7		3			1	3	2	2			1		1	2	150000				8				3		1		4	1	1	2		1	1	1	1	2	4	1	1	3	1	1
444	3	34	1	1	3	5	7		3			1	5	1	1					1	2	150000				3				3		1		4	1	1	2		1	1	1	2	1	4	2	1	2	1	1
1346	4	42	1	1	3	5	7		2		7		7	1	1					2		150000				1				3		3		1	1	2	2		1	1	1	2	2	2	2	1	2	1	1
11534	1	11	1	2	1	1	8	CARPENTER	2			2	2	2	1					1	2	150000				3				3		1		4	1		2		1	1	1	2	2	3	2	1	1	1	1
3123	1	12	1	2	1	1	8	CARPENTER	6	2	1	1	1							2		150000				4				3		1		3	1	1	2		1	1	1	2	2	4	2	1	1	1	1
73	2	25	1	1	1	1	8	CARPENTER	3	2			1	1					1	2		150000				4				3		3	ZINC	5	1	1	2		1	1	1	2	2	3	2	1	2	1	1
10904	2	23	1	2	1	1	8	DISABLE	6	1	1	1	2			1	1	2	1	1	1	150000								3		1		4	1	1	2		1	1	1	2	2	2	1	1	1	1	1
10899	2	23	1	2	1	1	8	DISABLE	6	1	2	1		1		1	2	1	2	1	1	150000								3		1		2	1	1	2		1	1	1	2	2	2	1	1	2	1	1
11265	2	23	2	1	2	5	8	DISABLE	2			2		1	1		1			1	1	150000								3		1		3	1	2	2		1	1	1	2	2	3	1	1	2	1	1
11259	2	23	2	1	2	1	8	DISABLE	2	1			1	1	1				1	1	1	150000				4				3		1		3	1	2	2		1	1	1	2	2	3	1	1	2	1	1
657	1	11	2	4	2	2	8	FISH SELLER	6	2	2	1	1							2		150000				4				3		1		5	1	2	2		1	1	1	2	2	4	1	1	1	1	1
10488	1	12	1	3	1	1	8	GOLD SMITH	2			2	1							1		150000								3		1		2	2	2	2		1	1	1	2	2	3	2	1		1	1
1395	4	41	1	1	1	5	8	MASON	3					1						2		150000								3		1		1	2	2	2		1	1	2	2	2	3	2	1	1	1	1
14	1	11	1	2	1	1	8	MECHANIC	6	0	0	1	2	2	2	0	0					150000				3				3		1		3	1	2	2		1	1	1	2	2	4	2	1	1	1	1
204	2	24	1	2	1	2	8	MECHANIC	6	1	1	2	3	3	2	0	0	1	1	1	1	150000		2	3					3		1		9	1	1	2		1	1	1	2	2	1	1	1	3	1	1
10324	2	24	1	1	1	5	8	MECHANIC	4					1						2		150000								3		1		1	1	2	2		1	1	1	2	2	4	2	2		2
10829	2	23	1	1	1	1	8	PHOTOGRAPHER	2			2	2							2		150000								3		1		5	1	2	2		1	1	1	1	1	3	2	2		2
131	2	25	1	1	1	1	8	TECHNICIAN	3	1			1	1	1					1	2	150000			2					3		1		5	2	1	2		1	1	1	2	1	4	2	2		2
3345	1	11	1	2	1	1	8	TYRE REPAIR	1	2	2								2	2		150000				4				3		1		4	1	1	2		1	1	1	2	2	2	2	2		2
338	1	13	1	4	1	1	8	WOOD CUTTER	1		1	2		2					2	1	2	150000		2		4				3		1		3	2	2	2		1	2	2	2	2	3	1	1	2	1	1
486	4	41	1	5	1	1	8	WOOD CUTTING	5	0	0	2	1	1	2	1	0	0	0	2		150000								3		3		5	1	2	2		2	1	2	2	2	3	2	1	1	1	1
564	1	12	2	1	2	2	1		6		2	1	2	1					1	1	2	160000		3		18				3		1		4	2	1	2		1	1	1	2	2	2	1	1	2	1	1
990	4	42	2	4	1	3	1		6	1	1	1			2				1	1	1	160000				3				3		1		8	2	1	2		1	1	1	2	2	2	1	1	3	1	1
174	2	25	1	2	1	2	2		6	1	1	2	3	3	2	0	0	0	2	2		160000		2	3					3		1		9	1	1	2		1	1	1	2	2	1	1	1	3	1	1
94	2	21	1	1	1	1	8	BIKE MECHANIC	6	6									2	1	2	160000								3		1		4	2		2		2	1	1	2	2	3	2	1	1	1	1
10569	3	32	1	3	1	6	8	MECHANIC	2					2	2					2		160000				4				3		1		4	1	2	2		1	1	1	1	1	4	2	2
11109	1	12	1	2	1	1	8	WATCH MECHANIC	3			2	1							1	2	160000								3		2		2	2	2	2		1	1	2	2	2	3	2	1	2	1	1
11106	2	24	1	2	4	6	8	CART PUSHER	6		1	1	1	2	1			1		1	1	170000								3		3	ZINC	3	2	2	2		1	1	2	2	2	4	2	2		2
1071	4	42	2	3	1	2	1		6			1	1		1					1	1	170000				5				3		1		2	1	2	2		1	1	1	2	2	2	2	1	1	1	1
263	1	13	2	2	4	2	2		6			4	2	1	3			2	1	1	1	170000	1		4	10				3		1		7	1	1	2		1	1	1	2	2	4	1	1	3	1	1
92	3	34	2	2	2	4	2		6			1			1					2		170000				4				3		1		3	1	1	2		1	1	1	2	2	4	2			2
11109	1	13	1	2	1	1	2		3			2	1							1	2	170000								3		2		2	2	2	2		1	1	2	2	2	3	2	1	2	1	1
295	1	13	1	2	1	1	8	CARPENTER	6	1	2		3	4	3			2	2	2		170000	2	3	4	5				3		1		5	2	1	2		2	1	2	2	2	3	2	2		1	1
295	1	13	1	2	1	1	8	CARPENTER	6	1	2		3	4	3			2	2	2		170000	2	3	4	5				3		1		5	2	1	2		2	1	2	2	2	3	2	2		1	1
5331	1	11	1	2	2	1	8	PHOTOGRAPHER	2	2	2	2	2							1	1	170000								3		2		3	2		2		1	1	1	1	1	3	2	2		2
10600	3	32	2	3	2	1	1		6		2	5	4	2	1				1	1	2	175000			3	4				3		1		8	1	2	2		1	1	1	2	2	3	2	1	2	1	1
475	4	41	2	2	1	4	1		6	1	1	2	0	2	2	0	0	0	1	1	1	175000				3				3		3		1	2	2	2		1	1	2	2	2	3	2	2		2
3377	1	11	2	2	2	2	1		6	1	1	1	2							2		180000				6				3		1		4	1	2	2		1	1	1	2	2	2	1	1	2	1	1
287	1	13	2	2	2	1	1		6	2	3	4	3	1	2			2	0	1	2	180000		3	4					3		1		3	1	1	2		1	1	1	2	2	2	2	2		1	1
287	1	13	2	2	2	1	1		6	2	3	4	3	1	2			2	0	1	2	180000		3	4					3		1		3	1	1	2		1	1	1	2	2	2	2	2		1	1
10996	2	24	2	1	1	1	1		6		1	2	1							1	1	180000								3		3	ZINC	3	1	2	2		1	1	1	2	2	3	2	1	1	1	1
10454	3	32	1	3	1	1	1		1	1				1	1					1	2	180000			3	4				3		1		2	1	1	2		1	1	1	2	2	4	2	1	1	2
1068	4	42	2	3	2	1	1		1			2	1	1	1					1	2	180000				4				3		1		2	2	2	2		1	1	1	2	1	3	2	1	2	1	1
10689	1	12	2	3	3	4	2							6	2							180000				4				3		1		4	1	1	2		1	1	2	2	2	3	2	2		2
11093	1	12	1	5	1	2	2		6			2	1	8	7					2		180000				4				3		1		5	1	2	2		1	1	1	2	2	3	1	1	7	1	1
267	1	13	1	1	1	2	2		6	2	1	3	1	1	1			0	2	1	2	180000			2	15				3		1		4	1	2	2		1	1	1	2	2	2	1	1	2	1	1
10926	2	23	2	1	1	5	2		5		1	2		3	3			1	2	1	2	180000								3		1		3	1	1	2		1	1	1	2	1	3	2	1	2	1	1
10855	2	23	1	2	1	1	2		2	1	1	2	2	3	3				1	1	2	180000								3		1		4	1	1	2		1	1	1	2	2	3	2	1	1	1	1
10500	2	25	1	4	1	1	2		6	3	2	1	1	1	2			1	1	1	2	180000								3		1		4	1	2	2		2	1	1	2	2	2	2	1	4	1	1
756	4	41	1	3	1	6	4		2	0	1	1	3	1	0	0	0	0	0	1	1	180000		2						3		1		1	2	2	2		1	1	1	2	2	3	2	1	2	1	1
4573	1	11	1	2	1	1	6		6	1	1	2	1	1	1					2		180000		1		4				3		1		3	1	1	2		1	1	1	2	2	3	2	1	2	1	1
294	1	13	1	2	1	1	8	BARBER	2	3	1	2	3	4	4			2	1		2	180000		3	1	5				3		1		4	1	2	2		1	1	1	2	2	3	2	1	2	1	2
294	1	13	1	2	1	1	8	BARBER	2	3	1	2	3	4	4			2	1		2	180000		3	1	5				3		1		4	1	2	2		1	1	1	2	2	3	2	1	2	1	2
11272	2	23	1	2	1	1	8	DISABLE	6	1		2	2	3	3				1	1	2	180000								3		1		4	1	1	2		1	1	1	2	2	3	1	1	2	1	1
11268	2	23	1	2	1	1	8	DISABLE	5	1	1	2	2	3	3				1	1	2	180000								3		1		4	1	2	2		1	1	1	2	2	3	1	1	2	1	1
266	1	13	1	4	1	2	4		6	1		2	2	2	3			0	2	1		190000		2	3	4				3		1		3	2	1	2		1	1	2	2	2	3	2	2		1	1
95	3	34	1	3	1	1	4		1	1	1	1		1	1			0	1	1	1	190000			8	2				3		1		3	1	1	2		1	1	1	2	2	2	1	1	1	1	1
11266	2	23	2	1	1		2													2		200000								3		1		2	1	2	2		1	1	1	2	2	3	1	1	1	1	1
324	1	11	1	2	2	3	1		6	0	0	0	0	3	0	0	0	1	4	2		200000								3		1		4	1	1	2		1		1	1		3	2	1	1	1	1
7	1	11	1	2	1	1	1		6	1	0	0	2	2	1	0	0			1	2	200000								3		1		3	1	2	2		1	1	1	2	1	4	2	2		2
29	1	11	1	2	1	1	1		1	1	0	1	2	1	1	0	0			2		200000				10				3		1		4	1	2	2		1	1	1	2	1	4	2	1	1	1	1
18	1	11	1	2	1	1	1		2	0	0	0	1	2	1	0	0			2		200000				3				3		1		3	1	2	2		1	1	1	2	2	4	2	2		2
3310	1	11	1	3	1		1													1	1	200000		2	3					3		1		3	2		2		1	1	1	2	2	3	2	2		2
662	1	11	1	2	1	1	1		1		2	1	1	1						1	2	200000			3					3		1		4	1	2	2		1	1	1	2	2	4	2	1	1	1	1
274	1	11	1	2	1	1	1		1	1			1						1	1	2	200000				4				3		1		2	1	1	2		2	1	1	2	2	3	2	1	1	1	1
291	1	11	1	4	1	1	1		1			3	2						2	1	2	200000								3		1		3	1	1	2		1	1	1	2	1	3	2	1	1	1	1
11622	1	11	1	2	1	1	1		1			1	1	2	2					1	2	200000			6	3				3		1		3	1	1	2		1	1	1	2	1	3	2	2		2
11631	1	11	1	2	1	1	1		5			2	2	2	1					1	2	200000			3	2				3		1		4	1	1	2		1	1	1	2	2	4	2	1	1	1	1
11633	1	11	1	2	1	1	1		2			2	2	1	2					1	2	200000				3				3		1		3	1	2	2		1	1	1	2	2	4	2	1	1	1	1
11635	1	11	2	1	2	1	1		1			1	2	1	1					1	2	200000				6				3		1		2	2	1	2		1	1	1	2	2	4	2	1	1	1	1
11640	1	11	1	3	1	2	1		1		1	2	2	2	3					1	2	200000				12				3		1		4	1	1	2		1	1	1	2	2	4	2	1	2	1	1
11641	1	11	1	2	1	1	1		5		1	1		2	2					1	2	200000								3		1		3	1	2	2		1	1	1	2	2	4	2	1	1	1	1
398	1	11	1	3	1	3	1		1					2					1	1	1	200000				5				3		1		5	1	1	2		1	1	1	2	1	3	2	2		1	1
10662	1	12	1	1	1	5	1		3	1									2			200000								3		1		4	1	2	2		2	1	1	2	2	3	2	1	1	1	1
10671	1	12	2	2	1	4	1		2		1	2		1						2		200000								3		1		2	1	2	2		2	1	1	2	2	3	2	1	1	1	1
10684	1	12	2	4	1	4	1		1			2	3	1								200000								3		1		3	1	2	2		2	1	1	2	2	3	2	1	1	1	1
11115	1	12	2	3	1	4	1		2			2	2						1	1	2	200000		3	6	10				3		1		3	1	1	2		1	1	1	2	2	4	2	1	2	1	1
11065	1	12	2	2	1	4	1		1		1	2	1	1					1	1	2	200000			1	3				3		1		3	1	2	2		2	1	1	2	2	3	2	1	1	1	1
3121	1	12	1	3	1	1	1		1	1	1	1	1					1	1	1	2	200000		2	3	4				3		1		5	1	1	2		1	1	1	1	1	4	1	1	1	1	1
3124	1	12	1	1	1	5	1		3	2										2		200000								3		1		4	1	1	2		1	1	1	2	2	4	2	1	1	1	1
10700	1	12	2	1	1	5	1		2		1	1						1	2			200000								3		1		2	1	2	2		1	1	1	2	2	3	2	1	1	1	1
158	1	12	2	1	1	5	1		2		1	1		1	1			1		2		200000								3		1		2	1	2	2		1	1	1	2	2	3	2	1	1	1	1
158	1	12	2	1	1	5	1		2		1	1		1	1			1		2		200000								3		1		2	1	2	2		1	1	1	2	2	3	2	1	1	1	1
3086	1	13	1	2	1	2	1		2	2	2	1	1	1	1				1	1	1	200000				10				3		1		6	1	1	2		1	1	1	2	2	4	1	1	1	1	1
15800	1	13	2	1	1	5	1		2		1	1		1	1			1		2		200000								3		1		2	1	2	2		1	1	1	2	2	3	2	1	1	1	1
66	1	13	1	2	1	5	1		2			1	1	1	1					2		200000		2	1	4				3		1		2	1	1	2		1	1	1	2	2	5	1	1	1	1	1
11065	2	21	2	2	1	4	1		1		1	2	1	1					1	1	2	200000			1	3				3		1		3	1	2	2		2	1	1	2	2	3	2	1	1	1	1
1062	2	21	1	2	1	1	1		6		1	3	0	1						2		200000				9				3		1		5	1	1	2		1	1	2	2	2	4	2	2		2
1071	2	21	2	2	1	6	1		5			2			2					2		200000				5				3		1		2	1	2	2		1	1	1	2	2	3	2	1	1	1	1
3037	2	22	2	2	2	1	1		6	1	1	2		1	1	1			1	1	1	200000				4				3		2		3	2	2	2		1	1	1	1	1	3	1	1	3	1	1
10544	2	22	2	2	2	1	1		1		1		1	1	1			1		1	1	200000								3		1		3	1	1	2		2	1	2	2	2	2	2	1	1	1	1
10700	2	22	2	1	1	5	1		2		1	1						1	2			200000								3		1		2	1	2	2		1	1	1	2	2	3	2	1	1	1	1
15800	2	22	2	1	1	5	1		2		1	1		1	1			1		2		200000								3		1		2	1	2	2		1	1	1	2	2	3	2	1	1	1	1
60	2	23	1	1	2	1	1		6	1	1	1	1	2						2		200000				4				3		1		2	1	1	2		1	1	1	2	2	4	2	2		2
10914	2	23	2	2	1	1	1		6	1	2					1	2	1	2	1	1	200000								3		2		4	1	1	2		1	1	1	2	2	2	1	1	2	1	1
10815	2	23	1	2	1	1	1		6	1		2	1						1	1	2	200000		2		4				3		2		2	1		2		1	1	1	2	2	3	2	1	2	1	1
11034	2	24	1	2	2	4	1		2	1	0	4	1	0	3	0	0	0	1	1	2	200000	0	2	1	3				3		1		6	1	1	2		2	1	2	2	2	2	1	1	3	1	1
12149	2	24	2	2	2	4	1		2			1	1	2				0	0	2		200000		2	1	6				3		1		2	1	1	2		1	1	2	2	2	3	2	1	1	1	1
12212	2	24	1	1	1	1	1		3		2			1	2			0	1	1	2	200000		2	1	4				3		1		3	1	1	2		1	1	1	2	1	4	2	1	2	1	1
12232	2	24	1	2	1	1	1		6	1	1	3	1	1	1	0	1	0	0	2		200000		2	6	4				3		1		5	1	1	2		1	1	1	2	1	3	1	1	4	1	1
12245	2	24	1	4	1	1	1		6		0	1	2	1	1	1		0	0	2		200000			4	2				3		2		3	1	1	2		1	1	2	2	1	3	2	1	1	1	2
12247	2	24	1	4	1	1	1		6		0	1	2	2	1	1	0	0	0	2		200000		1	2	1				3		2		3	2	2	2		1	1	2	2	2	3	2	1	1	1	2
317	2	24	1	4	1	1	1		2	0	0	0	0	2	1	0	0	2	2	2		200000								3		1		2	1	2	2		1	1	2	2	2	2	2	1	2	1	1
566	2	25	2	3	1	4	1		1	1	2	1	1	2	1	0	0	0	0	1	2	200000		10	5	18				3		1		2	2	2	2		1	1	1	2	2	2	2	1	3	1	1
269	2	25	1	5	1	2	1		6	0	0	3	2	3	4	1	0	0	0	2		200000								3		1		9	1	2	2		1	1	1	2	2	2	2	2		1	1
172	2	25	1	2	1	2	1		6	1	1	2	0	1	2	0	0	0	2	1	1	200000								3		1		3	2	2	2		2	1	2	2	2	3	2	2		2
10502	2	25	1	3	2	1	1		2			2		3	1							200000								3		2		3	1	2	2		1	1	1	2	2	2	2	1	2	1	1
3	2	25	1	2	2	6	1		1	1			1		1					2		200000		2	3	4				3		1		4	1	1	2		2	1	2	2	2	4	2	2		2
125	2	25	1	2	2	2	1		6	1		2	2		3					1	2	200000				4				3		1		5	1	1	2		2	1	1	2	2	4	2	1	1	2
136	2	25	1	2	2	1	1		6	1		2	2	3						1	2	200000		2	3	4				3		1		5	1	1	2		1	1	1	2	2	4	2	2		2
85	2	25	1	1	1	1	1		2	1		1		2	1					2		200000			1	2				3		1		4	1	1	2		1	1	1	2	2	3	2	2		2
45	2	25	1	2	2	1	1		1		1			1	1					1	1	200000				4				3		1		2	1	1	2		1	1	1	2	2	3	2	2		2
528	2	25	2	2	2	6	1		6	1		2	1		2				2	1	2	200000				8				3		1		4	2	2	2		2	1	1	2	2	2	2	1	2	1	1
11022	3	31	1	2	1	1	1		2	2	0	1	0	1	1	0	1	0	1	1	1	200000	0	2	1	5				3		1		4	1	1	2		1	1	1	2	2	3	1	1	3	1	1
94	3	31	1	1	3	5	1		3									2	2	2		200000				4				3		1		8	1	1	2		1	1	1	2	1	2	2	1	1	1	1
9854	3	31	2	2	2	1	1		1	1	2	1	1						1	1	2	200000				4				3		1		3	1	2	2		1	1	1	1	2	2	2	1	1	1	1
3070	3	31	1	2	1	6	1		6	2	1	1								2		200000				4				3		1		2	1	2	2		1	1	1	2	1	2	2	1	1	1	1
3074	3	31	2	3	2	1	1		1	1	2	1	1					1		1	1	200000				4				3		2		3	1	2	2		2	1	1	2	2	2	2	1	1	1	2
11406	3	32	2	2	2	1	1		2		1	2	2	1	1			0	0	1	1	200000	0	0	0	10		6	PIGS 9	3		1		4	1	1	2		1	1	1	2	2	4	2	1	1	2
11022	3	33	1	2	1	1	1		2	2	0	1	0	1	1	0	1	0	1	1	1	200000	0	0	0	5				3		1		4	1	1	2		1	1	1	2	2	3	1	1	3	1	1
12210	3	33	1	2	2	2	1		3		1	0	1	2	4	2		0	0	1	1	200000			5	8				3		1		4	1	1	2		1	1	1	2	2	3	2	1	3	1	1
12212	3	33	1	1	1	1	1		3		2			1	2			0	1	1	2	200000				4				3		1		3	1	1	2		1	1	1	2	1	4	2	1	2	1	1
12232	3	33	1	2	1	1	1		6	1	1	3	1	1	1	0	1	0	0	2		200000		2	6	4				3		1		5	1	1	2		1	1	1	2	1	3	1	1	4	1	1
12245	3	33	1	4	1	1	1		6		0	1	2	1	1	1		0	0	2		200000			4	2				3		2		3	1	1	2		1	1	2	2	1	3	2	1	1	1	2
381	3	34	1	1	3	1	1		3			2	3	5	6	1	1	1		1	2	200000			3	4				3		1		4	1	2	2		1	1	1	2	2	4	1	1	1	1	1
446	3	34	2	2	2	2	1		6			1	1	2	2					1	2	200000		3	1	5				3		1		4	1	1	2		1	1	1	2	2	4	1	1	2	1	1
460	3	34	1	2	1	1	1		3			4	2	1	1					1	2	200000				2				3		1		5	1	1	2		1	1	1	2	2	5	2	1	2	1	1
12014	3	34	1	2	1	2	1		2	1			2	3	3	1		0	1	1	2	200000				4				3		1		4	1	1	2		1	1	1	2	2	4	2	1	1	1	1
53	4	41	2	1	2	1	1		5		1	1	2	2						1	1	200000				13				3		1		4	1	2	2		1	1	1	2	2	3	2	1	1	1	1
967	4	41	1	2	1	1	1		6	0	1							1		2		200000								3		1		2	2	2	2		1	1	1	2	2	3	2	2		2
1224	4	41	1	1	1	1	1		6			2						2	2	2		200000								3		1		1	2	2	2		1	1	1	2	2	4	2	2		2
683	4	41	2	1	2	1	1		6	2				1	1			1		2		200000				4				3		1		5	1	2	2		1	1	1	2	2	2	2	1	1	1	1
9090	4	41	1	2	1	1	1		1			1	2	1	1					2		200000		4		2				3		1		2	1	1	2		1	1	1	2	2	4	2	1	1	1	1
9096	4	41	1	2	1	5	1		2			1	1	1	1					2		200000		2	1	4				3		1		2	1	1	2		1	1	1	2	2	5	1	1	1	1	1
403	4	42	2	2	2	2	1		1		2		4	1	1					2		200000				4				3				4	2	2	2		1	1	1	2	2	3	1	1	2	1	1
424	4	42	2	3	1	4	1		1			1	2		1					2		200000								3		1		2	1	2	2		1	1	1	2	2	4	2	2		2
425	4	42	2	3	2	2	1		1			1	2	1	2					2		200000				4				3		1			1	2	2		1	1	1	2	2	2	2	2		2	2
1008	4	42	2	3	1	4	1		6			1	1	1	1					2		200000		2		4				3		1		2	2	1	2		1	1	1	2	2	2	2	1		1	1
1011	4	42	2	2	1	3	1		3	1			1		1					1	2	200000								3		1		1	2	2	2		1	1	1	2	2	3	2	2
1060	4	42	2	2	2	1	1		6			2	1	1	2			1		2		200000				3				3		1		2	2	2	2		1	1	1	2	2	2	2	1	2	1	1
1062	4	42	2	1	2	1	1		3			1	1	1	1					1	1	200000								3		1		2	2	2	2		1	1	1	2	2	3	2	1	1	1	1
1066	4	42	2	2	1	3	1		3	1			1		1					1	2	200000								3		1		1	2	2	2		1	1	1	2	2	3	2	2
1074	4	42	1	1	3	5	1		3			1		1	1					2		200000								3		1		2	1	2	2		1	1	1	2	2	3	2	1	1	1	1
1075	4	42	1	1	1	5	1		5											2		200000					1			3		1		3	1	2	2		1	1	1	2	2	2	2	2
1266	4	42	2	1	4	5	1		3			2	2		1			1	1	1	1	200000				9				3		1		2	1		2		1	1	1	2	2	3	2	2
78	4	42	1	2	1	1	1		2			2	1	1	1					1		200000			6	3				3		1		4	1	2	2		1	1	1	2	2	4	2	1	1	1	1
188	4	42	1	2	1	2	1		6		2	2							2	1	1	200000								3		1		3	1	2	2		2	2	1	2	2	3	2	2		2
15744	4	42	1	2	1	1	1		6		2									2		200000								3		1		2	1	2	2		2	1	1	2	2	4	2	2		2
10747	4	42	1	2	2	1	1		1			1						2	1	2		200000								3		1		2	2	2	2		1	1	1	2	2	3	2	1	2	1	1
10580	4	42	1	5	1	2	1		5				6	6						2		200000		2						3		2		5	2	1	2		2	1	2	2	2	4	2	2		2
10305	4	42	2	4	1	1	1		1			2	3							2		200000				2				3		2		2	1	1	2		2	2	2	2	2	3	2	1	1	2
10304	4	42	2	2	1	1	1		6		1	3	2						1	1	2	200000			6	12				3		1		5	1	1	2		2	2	2	2	2	3	2	1	1	1	1
10316	4	42	1	2	2	1	1		3	3	1							2	2	2		200000				4				3		2		1	1	2	2		2	2	2	1	2	1	2	1	1	2
3037	4	42	2	2	2	1	1		4	1	1			1	1	1			1	1	1	200000				4				3		2		3	2	2	2		1	1	1	1	1	3	1	1	3	1	1
94	4	42	1	1	3	5	1		3									2	2	2		200000				4				3		1		8	1	1	2		1	1	1	2	1	2	2	1	1	1	1
3074	4	42	2	3	2	1	1		1	1	2	1	1					1		1	1	200000				4				3		2		3	1	2	2		2	1	1	2	2	2	2	1	1	1	2
60	4	42	1	1	2	1	1		6	1	1	1	1	2						2		200000				4				3		1		2	1	1	2		1	1	1	2	2	4	2	2		2
3086	4	42	1	2	1	2	1		2	2	2	1	1	1	1				1	1	1	200000				10				3		1		6	1	1	2		1	1	1	2	2	4	1	1	1	1	1
3126	4	42	1	4	1	1	1		2	1	1	1						2	1	2		200000		2	2	3				3				1	1	1	2		1	1	1	2	2	3	2	1	2	1	1
3127	4	42	1	4	1	1	1		2	1	1	1	1	2	2			1		1	2	200000								3		3	ZINC	1	1	1	2		1	1	1	2	2	3	2	1	2	1	1
39	4	42	1	3	1	2	1		6	3	1	4	1	6	4	1	1			1	1	200000				4				3		1		5	1	1	2		1	1	1	2	2	2	1	1	4	1	1
3614	4	42	2	3	4	5	1		1	1	1		1	1	1	1		1	2	2		200000								3		1		4	2	2	2		1	1	1			3		2		2
113	4	42	1	2	1	1	1		1	2		2	1						2	1	1	200000				6				3		1		5	1		2		1	1	1	2	2	4	2	1	1	1	1
117	4	42		1	1	1	1		3	1										1	2	200000				2				3		1		2	1	2	2		1	1	2	2	2	4		2
427	1	11	2	1	4	5	2		6	1	2	1	1	2	2		1		2	1	2	200000		2		1				3		1		8	2	2	2		2	2	1	2	2	2	2	1	31	1	1
11102	1	12	1	5	1	2	2		6			2	4		2			1	2	1	2	200000		7	5	11				3		1		7	1	1	2		1	1	1	2	2	4	1	1	4	1	1
17500	1	13	1	3	1	2	2		3	1			2	3	2					2		200000				4				3		1		3	2	2	2		1	1	1	2	2	2	2	1	1	1	1
59	1	13	1	2	1	1	2		1			1	2	1	1					2		200000		4		2				3		1		2	1	1	2		1	1	1	2	2	4	2	1	1	1	1
51	1	13	1	4	1	2	2		5		1	3	1	1	2				1		1	200000		9	22	10				3		1		3	1	1	2		1	1	1	2	1	5	1	1	1	1	1
98	1	13	2	5	1	6	2		6			2	2	1	1					1	1	200000				1				3		1		2	1	1	2		2	1	2	2	2	5	2	1	1	1	1
94	1	13	2	3	1	1	2		1	1		1	2	1	1				1	2		200000				10				3		1		2	1	1	2		1	1	1	2	2	5	2	1	1	1	1
11013	2	21	1	2	1	1	2		6	0	1	1	1	1	0	0	0	1	0	1	1	200000	0	2	2	40				3		2		2	2	2	2		1	2	2	2	2	1	1	1	2	1	2
1063	2	21	1	2	1	6	2		5			2	1		2					2		200000				8				3		1		5	2	2	2		1	1	1	2	2	4	2	1	2	1	1
390	2	21	1	2	1	1	2		6	1		2		1	2		1		2	1	2	200000				4				3		1		4	2	2	2		1	1	1	2	2	4	2	1	1	1	1
17500	2	22	1	3	1	2	2		3	1			2	3	2					2		200000				4				3		1		3	2	2	2		1	1	1	2	2	2	2	1	1	1	1
308	2	23	1	3	1	2	2		1	2	2	2	1		2			1	2	2		200000				4				3		1		5	1	1	2		2	1	2	2	2	2	2	1	2	1	1
261	2	23	1	2	1	1	2		6		1	2	2	3	3				1	1	2	200000								3		1		5	1	1	2		1	1	1	2	2	3	2	1	1	1	1
10428	2	23	1	2	1	4	2		6	1	1	2	2	3	3				1	1	2	200000								3		1		4	1	2	2		1	1	1	2	1	3	2	1	2	1	1
10810	2	23	1	1	1	1	2		6	1	1	2	1	1	1					1	2	200000			3	4				3		2		3	1		2		2	1	1	2	2	3	2	1	3	1	1
10912	2	23	1	2	1	1	2		6	2	1	2	1	1	2			1	1	1	1	200000				4				3		1		4	1	1	2		1	1	1	2	2	3	1	1	2	1	1
10907	2	23	2	1	1	3	2		5	1		2	1	1	1					2		200000								3		2		2	1		2		1	1	1	2	2	3	2	1	2	1	1
10856	2	23	1	2	1	1	2		3	1	1	2	2	3					1	1	2	200000								3		1		4	1	1	2		1	1	1	2	1	3	2	1	1	1	1
10853	2	23	1	2	1	1	2		4	1	1	2	2	3	3					1	2	200000								3		1		5	1	1	2		1	1	1	2	1	3	2	1	3	1	1
10846	2	23	1	2	1	1	2		6	1	1	2	2		3		4			1	2	200000		2						3		1		7	1	1	2		1	1	1	2	2	3	2	1	2	1	1
10844	2	23	1	4	1	1	2		6	1	1	2	2	3	3				1	1	2	200000								3		1		6	1	1	2		1	1	1	2	2	2	2	1	2	1	1
11038	2	24	1	2	1	1	2		5	1	1	2	2	1	1	0	0	0	0		2	200000	0	1	2	3				3		1		3	1	1	2		1	1	1	2	2	3	2	1	1		1
11007	2	24	2	4	2	4	2		5	0	0	0	2	2	1	0	0	0	0		2	200000	0		0	0				3		2		3	1	1	2		1	1	1	2	2	2	1	1	1	1	2
12176	2	24	1	5	1	1	2		2	2	0	2	1	1	0	1	0	0	0	2		200000		1	1	15				3		1		4	1	1	2		1	1	1	2	2	3	1	2		2
12235	2	24	1	3	1	1	2		2			3	2	1	1			0	0	2		200000		2	2	3				3		2		1	2	2	2		1	1	2	2	2	3	2	1	1	1	1
212	2	24	1	2	1	2	2		6	1	2	2	1	1	2	0	0	0	0	1	1	200000								3		1		3	1	2	2		2	2	1	2	2	3	2	2		2
214	2	24	1	2	1	2	2		6	0	2	2	0	1	2	0	0	2	2	1	1	200000								3		1		3	1	2	2		2	2	1	2	2	3	2	2		2
215	2	24	1	2	1	2	2		6	2	1	2	1	1	2			2	1	1	1	200000								3		1		3	1	2	2		2	2	1	2	2	3	2	2		2
966	2	25	1	3	1	2	2		1		3	1		4	2			1		1	2	200000		2	10	22				3		1		4	1	1	2		1	1	1	2	2	3	2	2		1	1
12080	2	25	1	3	1	1	2		5	0	0	1	2	1	1	0	0	0	0	2		200000	0	1	4	1				3		1		3	1	1	2		1	1	2	2	2	2	2	1	1	1	1
142	2	25	1	2	1	2	2		2	0	2	2	1	2	0	0	0	0	0	2		200000								3		1		3	1	2	2		2	2	1	2	2	3	2	2		2
143	2	25	1	2	1	2	2		6	1	2	2	2	0	0	0	0	2		1	1	200000								3		3		3	1	2	2		2	2	1	2	2	3	2	2		2
145	2	25	1	2	1	2	2		6	0	2	2	0	1	2	0	0	0	0	1	1	200000								3		3		3	1	2	2		2	2	1	2	2	3	2	2		2
146	2	25	1	2	1	2	2		6	1	2	2	1	1	2	0	0	2	2	2		200000								3		1		3	1	2	2		2	2	1	2	2	3	2	2		2
168	2	25	1	2	1	2	2		6	0	2	2	1	1	2	0	0	0	2	1	1	200000								3		1		3	1	2	2		2	2	1	2	2	3	2	2		2
166	2	25	1	2	1	2	2		6	0	2	2	0	1	2	0	0	0	2	1	1	200000								3		1		3	1	2	2		2	2	1	2	2	3	2	2		2
148	2	25	1	2	1	2	2		6	1	2	2	0	1	2	1	0	0	2	1	1	200000								3		1		3	2	2	2		2	2	1	2	2	3	2	2		2
147	2	25	1	2	1	2	2		6	0	2	2	0	1	2	0	0	2	2	1	1	200000								3		1		3	2	1	2		2	2	1	2	2	3	2	2		2
10506	2	25	2	2	2	1	2		1	2	3	1	2	2	3			0	0	1	2	200000				3				3		2		4	1	2	2		1	1	1	2	2	2	2	1	2	1	1
10508	2	25	1	2	2	1	2		1	0	1	2	0	1	1	0	0		1	1	1	200000			4					3		1		2	1	2	2		1	1	1	2	1	5	2	1	1	1	1
443	2	25	1	5	1	1	2		6		1		2	2	1					1	2	200000			3	4				3		1		4	1	1	2		1	2	1	2	2	3	1	1	1	1	1
56	2	25	1	2	1	1	2		6		1	1	2	1	2			1		2		200000								3		2		3	1	2	2		1	1	1	2	2	4	2	1	2	1	1
65	2	25	2	2	1	4	2		6	1		1		1	2					1	1	200000				4				3		3	ZINC	4	2	2	2		2	1	1	2	2	3	2	2
23	2	25	1	2	1	1	2		6		1	1	1	2	1			1		1	2	200000		2	3	4				3		1		2	2	1	2		2	1	2	2	2	2	2	2		2
50	2	25	1	1	1	1	2		6	1		1			2					1	2	200000		2	3	4				3		1		2	1	1	2		2	1	2	2	2	4	2	2		2
541	2	25	2	4	1	4	2		6		1	1	1		3		1			1	2	200000								3		1		5	1	2	2		2	1	1	2	2	3	2	1	2	1	1
11007	3	31	2	4	2	4	2		5	0	0	0	2	2	1	0	0	0	0		2	200000	0		0	0				3		2		3	1	1	2		1	1	1	2	2	2	1	1	1	1	2
4523	3	31	1	3	1	1	2		6		2	2	1	3	2	1			2	1	2	200000		2		4				3		1		3	1	2	2		2	2	2	1	1	1	2	1	3	1	1
11093	3	32	1	5	1	2	2		6			2	1	8	7					2		200000				4				3		1		4	1	2	2		1	1	1	2	2	3	1	1	7	1	1
10682	3	32	1	4	1	1	2		6	1	2		2							1	2	200000				2				3		2		1	1	2	2		1	1	1	2	2	4	2	1	2	2
10455	3	32	1	2	1	1	2		2			1	1							1	2	200000		2	3	4				3		2		2			2		1	1	1	2	2	2	2	1	1	1	1
11051	3	33	1	2	1	1	2		6	0	0	2	2	1	1	1	0	1	1	1	2	200000	1	1	1	10				3		2		3	2	2	2		2	1	1	2	2	1	1	1	2	1	2
11007	3	33	2	4	2	4	2		5	0	0	0	2	2	1	0	0	0	0		2	200000	0		0	0				3		2		3	1	1	2		1	1	1	2	2	2	1	1	1	1	2
12176	3	33	1	5	1	1	2		2	2	0	2	1	1	0	1	0	0	0	2		200000				15				3		1		4	1	1	2		1	1	1	2	2	3	1	2		2
265	3	34	1	2	1	2	2		3	1		1	2	4	3				1	1	2	200000				4				3		1		2	1	1	2		1	1	1	2	2	3	2	1	2	1	1
12011	3	34	1	2	1	2	2		2	1		3	1	2	3	1		0	1	1	2	200000				4				3		1		6	1	1	2		1	1	1	2	2	3	2	1	1	1	1
113	3	34	2	3	2	2	2		1	1		1	2	2	2	1		0	1	1	1	200000		2		18				3		1		5	1	1	2		1	1	1	2	1	2	1	1	2	1	1
110	4	41	1	2	1	1	2		3			2		3					1	1	2	200000			1	5				3		1		6	1	1	2		1	1	1	2	2	4	2	2		1	1
71	4	42	1	3	1	2	2		5		1	2	2	1	2				2	1	1	200000				10				3		1		4	1	1	2		1	1	1	2	2	3	2	2		2
70	4	42	1	5	1	1	2		2	1	1	3	2		3	1				1	1	200000			1					3		1		5	1	1	2		1	1	1	2	2	3	2	1	2	1	1
1110	1	12	1	4	1	2	2		5		1	3	1	1	2				1		1	200000		9	22	10				3		1		3	1	1	2		1	1	1	2	1	5	1	1	1	1	1
1099	2	21	1	3	1	1	3		5	1		1	3	1	1				1	1	2	200000		3	4	6				3		1		3	1	1	2		1	1	1	2	2	3	2	1	1	1	1
11431	3	32	1	2	1	1	3		6			2		1	3			0	0	1	1	200000	0	0	4	30				3		1		3	1	1	2		2	1	2	2	2	1	2	1	1	2
12237	3	33	1	2	2	1	3		1	1		2	1	2				0	0	2		200000								3		2		4	1	2	2		2	1	1	2	2	3	2	1	1	1	1
1271	4	41	1	1	3	1	3		2		2	1	1	4	3				2	1	2	200000								3		1		5	1	2	2		1	1	1	2	2	3	1	1	1	1	1
1272	4	41	1	2	1	4	3			2	3	4	3	2	2	0	0			2		200000				2				3		1		5	1	1	2		1	1	1	2	2	2	1	1	2	2
1294	4	41	1	2	1	4	3		1	1		1	1	1			1			2		200000								3		1		3	2	2	2		1	1	1	2	2	3	2	2		2
1296	4	41	1	1	4	5	3		2		1	1	2	3	3				2	1	2	200000				3				3		1		4	2	2	2		1	1	1	2	2	4	2	2		2
1299	4	41	1	2	4	5	3		1	1		1	1	2	3					1	2	200000				2				3		1		2	2	2	2		1	1	1	2	2	5	2	2		2
1309	4	41	1	2	1	1	3		5		1	1	2	2	1					1	1	200000								3		1		3	2	2	2		1	1	1	2	2	3	2	1	1	1	1
10331	1	11	2	1	1	5	4		2	1									2	1	2	200000				4				3		1		1	1	2	2		1	1	1	2	2	3	2	1	2	1	1
10355	1	11	1	4	1	2	4		6			2	1	2	1					2		200000				4				3		1		5	1	1	2		1	1	1	2	1	3	2	1	1	1	1
87	1	13	2	2	1	4	4		2	1		1	1	1	1					1	1	200000				4				3		1		2	1	1	2		1	1	1	2	2	5	2	1	1	1	1
1068	2	21	1	2	1	1	4		5	3	2				1				1	1	2	200000								3		1		4	1	2	2		1	2	1	2	2	2	2	2		2
1090	2	21	1	2	1	1	4		1	2	1	1	1	1	1					2		200000		4	3	8				3		1		2	1	1	2		1	1	1	2	2	4	2	2		2
80	2	21	1	1	1	5	4		2				1							2		200000				8				3		1		8	1	2	2		1	1	1	2	2	4	2	2		2
591	2	22	1	3	1	1	4		6	2	1	2	1	1	1	0	0	1	1	2		200000				5				3		1		4	1	2	2		1	1	1	2	2	2	1	1	2	2
517	2	23	1	2	1	1	4		1	2	1	1	1	2				1		1	2	200000		2		4				3		1		4	1	1	2		1	1	1	2	2	3	2	1	1	1	1
10434	2	23	2	1	2	1	4		2	1			1	3	2			1		1	1	200000				4				3		1		4	1	1	2		1	1	1	2	2	2	1	1	2	1	1
12246	2	24	1	4	1	1	4		5	0	1	2		1	1			0	0	2		200000		1	2	1				3		2		2	1	2	2		1	1	2	2	2	4	2	1	1	1	1
130	2	25	1	2	1	1	4		1		1		2						2	1	2	200000								3		1		8	2		2		1	1	2	2	2	3	2	1	2	1	1
462	3	33	2	2	2	1	4		1											1	2	200000			3					3		1		4	1	2	2		2	1	1	2	2	3	2	1	3	1	1
430	4	42	1	3	1	5	4		3		1			1	1				1	2		200000				4				3		1		2	2	2	2		1	1	1	2	2	4	1	2		1	1
15743	4	42	2	3	1	1	4		5			1			2							200000								3		1		2	2	2	2		2	1	1	2	2	2	1	2		2
517	4	42	1	2	1	1	4		1	2	1	1	1	2				1		1	2	200000		2		4				3		1		4	1	1	2		1	1	1	2	2	3	2	1	1	1	1
3033	4	42	1	3	1	1	4		3	1		2			2			1		1	2	200000								3		3		2	1	1	2		1	1	1	2	2	3	2	1	2	1	1
31	1	11	1	1	1	1	5		3	0	0	0	3	1	1	0	0			1	2	200000			3					3		1		4	2	2	2		1	1	1	2	1	3	2	1	2	1	1
19	1	11	1	1	1	1	5		6	2	0	0	0	2	2	0	0			1	1	200000								3		1		2	1	1	2		1	1	1	2	2	3	2	1	1	1	1
5328	1	11	2	2	2	5	5		2	2	2	2	2							2		200000								3		2		2	2	2	2		1	1	1	2	2	1	2	2		2
162	1	11	1	3	1	1	5		1	1		3								1	2	200000								3		1		1	1	1	2		2	1	1	2	1	3	2	1	2	1	1
163	1	11	1	3	1	1	5		1		2	2							2	1	2	200000								3		1		1	1	2	2		2	1	1	2	1	3	2	1	2	1	1
165	1	11	1	2	1	1	5		2			2	2							1	1	200000				4				3		1		2	1	2	2		1	1	1	2	1	4	2	1	1	1	1
11660	1	11	1	2	1	1	5		6	1	1	1	1	3	2					1	2	200000			1	3				3		1		1	2	2	2		1	1	1	2	1	5	2	1	2	1	1
521	1	12	1	1	1	5	5		2	1	2		3		2		1		1	1	2	200000								3		2			1	2	2		2	1	2	2	2	3	1	1	2	1
3079	1	13	1	1	2	1	5		3	1	1								1	1	1	200000								3		1		4	1	1	2		1	1	1	1	2	2	1	1	1	1	1
103	1	13	1	3	1	1	5		3			1	3					1		1	2	200000				4				3		1		1	2	2	2		1	1	1	2	1	3	2	2		2
584	2	22	1	1	3	5	5		2	1	2	1	3	1	0	0	0	1		2		200000			2	3				3		1		3	2	2	2		1	1	1	2	2	2	2	1	2	2
11145	2	24	1	2	1	1	5		2	1		2	3	1	1		1	1		1	1	200000			1	5				3		1		4	1	1	2		1	1	1	2	1	4	1	1	4	1	1
182	3	31	1	1	1	5	5		2		2	1	1	3	2	1			2	2		200000		2		4				3		3	TARPAULIN	3	2	2	2		1	1	2	2	2	3	2	1		1	1
10647	3	32	1	1	1	1	5		3	1										1	2	200000				5				3		1		3	1	1	2		1	1	1	2	2	4	2	2		2
11481	3	32	1	2	1	1	5		3	1	1								1	1	1	200000		1		2				3		2		3	2	1	2		1	1	1	2	1	2	2	2		2
11462	3	32	1	2	1	1	5		6	1		2		3				1		1	2	200000		1		3				3		1		1	2	2	2		1	1	1	2	1	1	2	1	1	2
12036	3	34	1	1	1	1	5		2		1	1	1	1	1			0	1	1	2	200000								3		1		2	1	2	2		1	1	1	2	1	4	1	1	3		1
46	4	41	1	1	2	1	5		1		1	1		1						1	1	200000				2				3		1		1	2	1	2		1	1	1		2	4	2	1	2	1	1
51	4	41	1	1	1	1	5		3		1	1	2	1	1					1	1	200000				6				3		1		3	1		2		1	1	1		1	4	2	1	1	1	1
10532	4	41	1	2	1	2	5		3			1						0	0	1	1	200000					1			3		3		2	2	2	2		1	1	1	2	1	3	2	1	1	1	1
10534	4	41	1	1	3	6	5		3	1								0	0	1	1	200000								3		1		2	2	2	2		1	1	1	2	1	5	2	2		1	1
12131	4	41	1	2	1	1	5		2		1	0	2	1	1				1	1	2	200000		2	2	4				3		1		3	1	1	2		1	1	1	2	2	3	2	2		2
76	4	42	1	2	1	2	5				1	1	2	2	1					1	2	200000	6	3						3		1		3	1	1	2		1	1	1	2	2	4	2	1	1	1	1
3079	4	42	1	1	2	1	5		3	1	1								1	1	1	200000								3		1		4	1	1	2		1	1	1	1	2	2	1	1	1	1	1
4029	1	12	1	5	1	1	6		2	2	1	1	1	2	1				1	1	2	200000								3		1		6	1	1	2		1	1	1	2	2	3	2	1	1	1	1
5350	1	12	1	2	1	1	6		1	4								1		2		200000				4				3		1		5	1	1	2		1	1	1	1	2	2	2	2		2
289	1	13	1	2	1	1	6		1	2	1								1	1	2	200000								3		1		4	1	1	2		1	1	1	2	2	4	2	1	1	1	1
536	2	24	1	2	1	1	6		3	1	0	2	1	1	5	0	0			1	2	200000								3		1		4	1	2	2		1	1	2	2	2	4	2	2		2
10313	2	24	1	2	1	1	6		2		2		4	1	1					2		200000				5				3		1		1	2	2	2		1	1	1	2	2	2	2	1	2	1	1
163	2	25	1	2	1	2	6		6	0	4	1	2	1	3	0	0	0	2	2		200000		2	3	4	3			3		1		6	1	2	2		1	1	2	2	1	1	2	1	2	1	2
15	2	25	1	3	1	1	6		6	1	1			3	2					1	2	200000				4				3		1		4	1	1	2		1	1	1	2	2	4	2	2		2
6	2	25	1	4	1	1	6		6			1	1	2	1					2		200000								3		1		4	1	2	2		1	2	1	1	2	4	1	2		1	1
8	2	25	1	5	1	1	6		6			1	1	1	1					2		200000		2		4				3		1		4	1	1	2		1	1	1	2	2	4	2	2		2
9	2	25	1	1	1	1	6		6			1	1	1	1					2		200000								3		1		2	1		2		2	1	2	2	2	2	2	2		2
134	3	31	1	1	1	1	6		5									1				200000	1	2						3		1		3	1	1	2		1	1	1	2	2	4	2	1	3	1	1
155	3	31	1	1	2	5	6		3	1	2									2		200000		2						3		1		2	2	1	2		1	1	1	2	2	4	2	2		2
7	4	42	1	1	3	5	6		3			1										200000		5						3		1			2	2	2		2	1	1	2	2	2	1		1	1	1
113	4	42	1	2	1	1	6		1	2		2	1						2	1	1	200000				6				3		1		5	1		2		1	1	1	2	2	4	2	1	1	1	1
117	4	42	1	1	1	1	6		3	1										1	2	200000				2				3		1		2	1	2	2		1	1	2	2	2	4		2
130	4	42	1	1	2	5	6		1									1		1		200000								3		1		1	2	2	2		1	1	2	2	2	1	2	2
134	4	42	1	1	1	1	6		5		1		1		1	1		1		2		200000								3		1		3	1	1	2		1	1	1	2	2	4	2	1	3	1	1
155	4	42	1	1	2	5	6		3	1	2									2		200000		2						3		1		2	2	1	2		1	1	1	2	2	4	2	2		2
289	4	42	1	2	1	1	6		1	2	1								1	1	2	200000								3		1		4	1	1	2		1	1	1	2	2	4	2	1	1	1	1
7	4	42	1	1	3	5	6		3			1										200000		5						3		1			2	2	2		2	1	1	2	2	2	1		1	1	1
118	4	42	1	4	1	2	6		1			2			4					2	2	200000		2		5				3		1		5	1	1	2		1	1	1	1	2	4	2	1		1	1
130	4	42	1	1	2	5	6		1									1		1		200000								3		1		1	2	2	2		1	1	2	2	2	1	2	2
3344	1	11	1	2	1	5	7		3	2										2		200000								3		1		5	1	1	2		1	1	1	2	2	2	2	2		2
516	2	21	1	2	1	6	2		2	1				1	1					2		200000				4				3		1		2	1	1	2		1	1	1	2	2	4	2	2
109	2	21	1	1	3	5	8	ATAYA BASE	3	2										2		200000		2						3		1		3	2	1	2		2	1	1	2	2	2	1	1	1	1	1
117	2	21	1	1	2	5	8	ATAYA BASE	3	1	2								2	2		200000		2						3		1		3	1	2	2		1	1	1	2	2	4	2				2
109	4	42	1	1	3	5	8	ATAYA BASE	3	2										2		200000		2						3		1		3	2	1	2		2	1	1	2	2	2	1	1	1	1	1
117	4	42	1	1	2	5	8	ATAYA BASE	3	1	2								2	2		200000		2						3		1		3	1	2	2		1	1	1	2	2	4	2				2
505	2	23	1	1	1	5	8	BARBER	3	1				2					1			200000			3					3		2		2	2		2		1	1	1	2	2	3	2	1	1	1	1
296	1	13	1	2	1	1	8	CARPENTER	6	1	2	3	4	6	6	1	1	1	4	1	1	200000	2	3	4					3		1		10	2	1	2		1	1	1	2	2	3	2	2		1	1
296	1	13	1	2	1	1	8	CARPENTER	6	1	2	3	4	6	6	1	1	1	4	1	1	200000	2	3	4					3		1		10	2	1	2		1	1	1	2	2	3	2	2		1	1
180	1	13	1	2	1	1	8	CARPENTER	2	1	1								1	2		200000								3		1		2	2	2	2		1	1	1	2	2	3	2	2		2
358	4	42	1	3	1	1	8	CARPENTER	6	1		1			1					2		200000								3		1		2	2	2	2		1	1	1	2	2	4	2	2		2
3070	4	42	1	2	1	6	8	CARPENTER	6	2	1	1								2		200000				4				3		1		2	1	2	2		1	1	1	2	1	2	2	1	1	1	1
10900	2	23	1	2	1	4	8	DISABLE	6	1	2			1	3	1		1	2	1	1	200000								3		1		4	1	1	2		1	1	1	2	2	2	1	1	2	1	1
10898	2	23	1	1	1	1	8	DISABLE	6	1	1	2	1	1		1		1	2	1	1	200000								3		1		1	1		2		1	1	1	2	2	2	1	1	2	1	1
11271	2	23	1	2	1	1	8	DISABLE	6	1	1	2	2	3	3				2	1	2	200000								3		1		4	1	1	2		1	1	1	2	2	3	2	1	1	1	1
11270	2	23	1	1	1	1	8	DISABLE	6		1	2	2	3	3					1	2	200000								3		1		3	1	2	2		1	1	1	2	2	3	1	1	1	1	1
11238	2	23	1	1	1	1	8	DISABLE	6		1	1		1	1				2	1	1	200000								3		1		2	1	2	2		1	1	1	2	2	3	1	1	2	1	1
2152	4	41	1	2	1	1	8	DISABLE	3	1		1		1	1				1	1	2	200000								3		1		2	1	2	2		1	1	1	2	2	3	2	2		1	1
5321	1	12	1	2	2	2	8	PHOTOGRAPHER	2	2	2									1	1	200000		1	2					3		1		5	2	1	2		1	1	1	2	2	3	2	2		2
11580	1	11	1	2	1	2	8	SAND MINING	6	1			3					1		1	1	200000				10				3		1		4	1	1	2		1	1	1	2	2	3	1	1	2	1	1
127	2	25	1	2	1	1	8	WELDER	6	1		2	2	1	3			1		1	2	200000		2	3	4				3		1		4	1	1	2		2	1	1	2	1	3	2	1	2	2
484	4	41	1	5	1	3	8	WOOD CUTTING	5			2	2	1	4	1	0	0	1	1	1	200000				8				3		3	ZINC	6	1	2	2		1	1	1	2	2	3	2	2		1	1
319	1	13	2	3	1	1	2		6	1	1		2						2	1	1	210000				4				3		1		2	2	1	2		1	2	2	2	2	2	1	1		1	1
10318	4	42	1	2	2	1	1		6	1	1	2	1	2						2		215000				4				3		2		3	2	2	2		2	2	2	2	1	2	2	2		2
10661	3	32	1	2	1	1	2		5			1	3							2		220000		6						3		1		3	1	1	2		1	1	1	2	2	3	2	1	1	2
320	2	25	1	4	1	2	6		2				4	2	2					2		220000								3		2		5	2	2	2		1	1	2	2	2	1	2	1	2	1	1
11264	2	23	2	2	1	6	8	DISABLE	5			2	1	1	1					1	1	220000								3		1		3	1	2	2		1	1	1	2	2	3	1	1	2	1	1
11257	2	23	1	2	1	1	8	DISABLE	5		1	2	1	1	1				1	1	1	220000				4				3		1		3	1	2	2		1	1	1	2	2	3	1	1	2	1	1
10627	3	32	1	2	1	2	2		6	2		1	2	1	2					1	2	224000				4		6	DUCKS 4	3		1		4	1	1	2		2	2	1	2	2	4	1	1	3	1	1
6104	1	11	2	2	1	2	1		6	2	1	1	1	1	2					1	2	240000				4				3		1		4	1	2	2		1	1	1	2	2	3	2	1	1	1	1
563	1	12	1	2	1	1	2		6	2	1	1	1	1					1	1	2	240000								3		1		4	2	2	2		2	2	2	2	2	2	2	1	42	1	1
10681	3	32	1	2	1	1	2		6	2										1	2	240000								3		2		1	1	2	2		1	1	1	2	2	4	2	2		2
11256	2	23	1	1	1	5	8	DISABLE	2					2			1					240000			3					3		1		3	1	1	2		1	1	1	2	2	3	1	1	1	1	1
14004	1	12	1	2	1	1	2		4			1	2	1	2	1				2		250000			15	4				3		3	ZINC	4	1	1	2		1	1	1	2	1	3	2	1	2	1	1
5	1	11	2	2	2	1	1		6	0	1	2	1	2	2	0	0			1	2	250000			1	3				3		1		3	1	1	2		1	1	1	2	1	4	2	1	2	1	1
4254	1	11	1	3	1	5	1		6	2	2									2		250000			3					3		1		4	1	1	2		1	1	1	2	2	2	1	1	1	1	2
11644	1	11	1	2	1	1	1		2		1	2	2	2	1					1	2	250000				3				3		1		4	1		2		1	1	1	2	2	3	2	1	1	1	1
11632	1	11	1	1	1	5	1		1			2	1	1	1					1	2	250000								3		1		3	1	1	2		1	1	1	2	1	4	2	1	1	1	2
292	1	11	1	2	1	2	1		6			4	4					1		1	1	250000								3		1		3	2	1	2		1	1	1	2	2	3	1	1	1	1	1
3282	1	12	1	2	2	1	1		6	2	2	3								1	2	250000				4				3		1		7	1	1	2		1	1	1	2	2	2	2	2		2
152	1	12	2	3	2	2	1		5				2	2	3					2		250000								3		1		4	1	2	2		1	1	1	2	2	3	2	2		2
3093	1	13	1	3	1	1	1		1	1	2	1	1	1						2		250000				10				3		1		3	1	1	2		1	1	1	2	2	2	1	1	2	1	1
107	1	13	1	2	1	1	1		6			4	2	1	3			0	0	1		250000		2	3	4				3		1		5	1	1	2		1	1	1	2	1	3	2	1	1	1	1
10728	2	22	2	2	2	1	1		3	1		1		1	1				1	1	1	250000		2						3		1		3	1	1	2		2	1	1	2	2	2	2	1	2	1	1
12239	2	24	2	5	2	1	1		1	1	1	1	2	0	2			1	0	1	2	250000		3	1	2				3		1		4	1	1	2		1	1	1	2	2	3	1	1	2	1	1
11104	2	24	1	1	1	1	1		6	1			2	1	1	1		1		2		250000				4				3		3	ZINC	4	2	2	2		1	1	1	2	2	4	2			2
250	2	25	1	3	1	2	1		6	1	1	1	1	3	3					1	2	250000		2	3					3		1		5	1	1	2		1	1	1		1	3	2	1	2	1	1
82	2	25	1	2	2	2	1		2		1	1	1	1	2					1	2	250000		2		2				3		1		5	1	1	2		1	1	1	2	1	4	2	2		2
1648	3	31	1	3	1	1	1		1	1	2								2	1	2	250000								3		1		4	2	2	2		1	1	1	2	1	4	1	2		1
7849	3	31	2	3	2	1	1		6	1	1	1	2							1	2	250000				4				3		1		3	1	2	2		1	1	1	1	2	2	2	1	2	1	1
10563	3	32	1	2	2	4	1		6			1	2	1	1					2		250000				4				3		2		3	1	2	2		2	1	1	2	2	2	2	1	2	1	1
12239	3	33	2	5	2	1	1		1	1	1	1	2	0	2			1	0	1	2	250000		3						3		1		4	1	1	2		1	1	1	2	2	3	1	1	2	1	1
375	3	34	1	2	1	1	1				1	1	1	1	1				1	1	2	250000			1	4				3		1		4	1	1	2		1	1	1	2	1	1	2	1	2	1	1
1217	4	41	1	2	1	1	1		6		1	2		1					1	1	2	250000		2	4					3		1		2	1	2	2		1	1	1	2	1	3	2	2		1	1
460	4	42	2	3	1	4	1		6			2	1		1					2		250000								3		1		2	1	2	2		1	1	1	2	2	2	2	2		2	2
858	4	42	1	1	3	5	1		3					2								250000								3		1			2	2	2		1	1	1	2	2	4	2	2
874	4	42	2	3	1	4	1		6			1		1	1					2		250000								3		1		3	1	2	2		1	1	1	2	2	3	2	1	1	1	1
1072	4	42	2	1	2	1	1		3	1				1	1				1	1	1	250000								3		1		1	2	2	2		1	1	1	2	1	4	2	1	1	1	1
1255	4	42	1	1	4	5	1		3			2	1	2	2					2		250000				6				3		1			1		2		1	1	1	2	2	3	2	2		2	2
1258	4	42	2	3	1	4	1		6	1	1	1	2	1					1	1	1	250000						6	CAT 1	3		1		3	2	2	2		1	1	1	2	2	3	2	2		2
3093	4	42	1	3	1	1	1		1	1	2	1	1	1						2		250000				10				3		1		3	1	1	2		1	1	1	2	2	2	1	1	2	1	1
3369	4	42	2	2	2	4	1		3											1	1	250000								3		2		4	1	1	2		1	1	1	2	2	2	2	2		2
3037	4	42	1	4	1	1	1		2			2	1	1	2					2		250000								3		3		3	1	1	2		1	1	1	2	2	3	2	1	2	1	1
3052	4	42	1	4	1	1	1		4			1	1	1	2	1					2	250000								3		3		4	1	1	2		1	1	1	2	2	3	2	1	2	1	1
119	4	42	2	2	1	6	1		1			1			1					1	2	250000				5				3		1		2	2	1	2		1	1	1	2	2	4	2
122	4	42	1	1	2	5	1		1			1										250000								3		1		1	2	2	2		2	1	2	2	2	4
1200	1	13	2	3	2	2	1		5				2	2	3					2		250000								3		1		4	1	2	2		1	1	1	2	2	3	2	2		2
579	1	11	1	1	4	1	2		3	0	1	0	0	1	1	1	1	1	3	2		250000		1	1	4				3		2		4	1	1	2		2	2	1			2	2	1	2	1	1
39	1	11	1	2	1	1	2		2	2	0	1	1	1	1	0	0	2	1	2		250000				15				3		1		3	1	1	2		1	1	1	2	2	2	2	1	1	1	1
10690	1	12	2	2	2	2	2		6			1	1	3	1						2	250000				2				3		1		4	1	1	2		2	1	1	2	2	3	2	1	2	1	1
299	1	12	2	2	2	4	2		2	2	2	2								2		250000		2		4				3		2		3	2	2	2		1	1	1	2	2	2	2	2		2
3369	1	13	2	2	2	4	2		3	2	1	2	1							1	1	250000		2						3		2		4	1	1	2		1	1	1	2	2	2	2	2		2
10916	2	23	2	2	1	1	2		6	1	2	1		1	3				2	1	2	250000				4				3		1		4	1	1	2		1	1	1	2	2	2	1	1	1	1	1
10909	2	23	2	1	1	4	2		6			1	1		1					1	2	250000			3					3		2		2	1		2		1	1	1	2	2	3	2	1	2	1	1
70	2	25	2	2	1	4	2		6	1		1		1	2					1	1	250000				4				3		3	ZINC	3	1	2	2		2	1	1	2	2	3	2	2
46	2	25	1	1	2	5	2		6		1	1		1	2					1	1	250000			3					3		1		4	1	1	2		1	1	1	2	2	3	2	1		2
48	2	25	1	1	1	5	2		6			1	1		2					1	1	250000				2				3		1		2	1	1	2		1	1	1	2	2	3	2	1	1	1	1
496	4	41	2	2	1	1	2		6		1	8	2	2	3					2		250000		2						3		1		6	1	1	2		1	1	2	2	2	2	1	1	3	1	1
321	4	42	2	2	2	1	2		6			1	1	1	1					2		250000				4				3		1		2	2	2	2		1	1	2	2	2	3	1	1	1	2
73	4	42	1	3	1	2	2		1		3	2	2	1	2					1	2	250000				1				3		1		10		2	2		1	1	1	2	2	3	2	1	1	1	1
72	2	25	1	3	1	1	3		3			6	4	1	1					1	2	250000			3	4				3		3	ZINC	5	1	1	2		1	1	1	2	2	3	2	1	1	1	1
10694	3	32	1	2	1	1	3		2	1		2							1	1	2	250000				6				3		1		3	1	1	2		1	1	1	2	2	3	1	1	2	2
11045	3	33	1	1	1	1	3		1	0	0	1	1	1	1	0	1	0	0	2		250000	0	0	4	5				3		2		2	1	2	2		2	1	1	2	1	2	1	1	1	1	2
1268	4	41	1	3	1	1	3		1			2	3	1	1					2		250000				2				3		1		2	2	2	2		1	1	1	2	2	3	2	2		2
1289	4	41	1	1	4	5	3		1		1	2	1	2	1					1	1	250000				1				3		1		3	2	2	2		1	1	1	2	2	3	2	1	1	1	1
1302	4	41	1	2	2	5	3		5	1	1	1		2	1					2		250000				4				3		1		2	2	2	2		1	1	1	2	2	5	2	2		2
1306	4	41	1	2	1	1	3		1			4	1	2	1					2		250000				3				3		1		2	2	2	2		1	1	1	2	2	3	2	1	1	1	1
6	1	11	2	1	2	1	4		2	0	0	2	1	1	2	0	0			1	2	250000			2	3				3		1		2	1	2	2		1	1	1	2	2	4	2	1	1	1	1
10670	1	12	1	2	1	1	4		5			1	2	2	1							250000								3		1		2	1	2	2		1	1	1	2	2	4	1	2
4218	1	13	1	3	1	1	4		6	1	2	1	1	1						2		250000		2	3					3		1		3	1	1	2		1	1	1	1	2	4	2	1	2	1	1
287	2	24	1	2	1	5	4		3	0	0	1	0	2	0	0	0		2	2		250000								3		2		2	2	2	2		1	1	2	2	2	2	2	2		1	2
541	2	25	1	1	1	1	4		5	1	0	5	2	5	2	1	0	0	2	1	2	250000								3		1		3	2	2	2		2	1	1	2	2	4	2	1	1	1	2
52	2	25	1	1	1	1	5		1	1	1	1		1						1	1	250000				7				3		1		3	1	1	2		1	1	1		1	4	2	1	1	1	1
536	2	25	1	1	1	1	5		3		1	1	1	3	1		1	1	1	2		250000			4	6				3		1		3	1	1	2		1	1	1	2	1	3	2	1	3	1	1
464	3	34	1	1	1	2	5		3		2		2	1	3				1	1	2	250000								3		1		3	1	1	2		1	1	1	2	1	5	2	1	2	1	1
193	1	11	1	3	1	1	6		6	1		4	3						2	1	2	250000								3		1		1	2	2	2		2	1	2	2	2	4	2	1	1	1	1
10924	2	23	1	2	1	1	6		6	1		2	2	3	3			1	1	1	2	250000								3		1		4	1	1	2		1	1	1	2	2	3	2	1	2	1	1
257	2	25	1	1	1	1	6		3			1	1	1	1					2		250000								3		1		2	1	2	2		1	1	1	2	1	3	2	1	2	1	1
138	3	31	1	4	1	2	6		1	1	2	2	3									250000			3	4				3		1		2	1	2	2		1	1	1	2	2	4	2	1	1	1	1
4153	3	31	1	1	1	1	6		1	2	1	2	3							2		250000								3		1		4	1	1	2		1	1	1	2	2	4	2	2		2
31	4	42	1	1	2	5	6		3	1										1	2	250000								3		1		1	2	2	2		2	1	1	2	2	4
40	4	42	1	1	1	5	6		6			1										250000								3		1		1	2	2	2		1	1	1	2	2	2	2	1	1	1	1
119	4	42	1	2	1	6	6		1			2			1					1	2	250000				5				3		1		2	2	1	2		1	1	1	2	2	4	2
123	4	42	1	2	1	6	6		3				2									250000				3				3		1		2	2	1	2		1	1	1	2	2	4
138	4	42	1	4	1	2	6		1	1	2	2	3									250000			3	4				3		1		2	1	2	2		1	1	1	2	2	4	2	1	1	1	1
4153	4	42	1	1	1	1	6		1	2	1	2	3							2		250000								3		1		4	1	1	2		1	1	1	2	2	4	2	2		2
31	4	42	1	1	2	5	6		3	1										1	2	250000								3		1		1	2	2	2		2	1	1	2	2	4
[truncated: 7,995 more rows]
[truncated: 33 more columns]

## Sheet: recoding
															rename sex male; recode male (1=1)(2=0); label define m 1 male 0 female; label values male m;
		rename	SAQ100		male; recode male (1=1)(2=0); label define m 1 male 0 female; label values male m;						;				recode female (1=0)(2=1)
		rename	SAQ101		age		;	label define Age 1 "18-30" 2 "31-45" 3 "46-50" 4 "51-59" 5 "60plus"	;	label values age Age	;				label define fm 1 female 0 male
		rename	SAQ102		relHH		;	label define RelHH 1 "Head" 2 "Spouse" 3 "Child" 4 "Others"	;	label values relHH RelHH	;				label values female fm
		rename	SAQ103		marital		;	label define Marital 1 "marriedMon" 2 "marriedPol" 3 "divorced" 4 "widowed" 5 "single" 6 "separated"	;	label values marital Marital	;
		rename	SAQ104		occupation		;	label define Occ 1 "pettrade" 2 "farming" 3 "fishing" 4 "tailor" 5 "biker" 6 "driver" 7 "student" 8 "other"	;	label values occupation Occ	;
		rename	SAQ104_B_SPECIFY		otherocc		;
		rename	SAQ105		education		;	label define educ 1 "primary" 2 "JSS" 3 "SSS" 4 "Tert" 5 "Nonfrom" 6 "Never"	;	label values education educ	;
		rename	SAQ106_1_0_5_YRS_MALE		zero5MALE		;
		rename	SAQ106_1__0__5_FEMALE		zero5FEMALE		;
		rename	SAQ106_2__6__18_YRS_MALE		six18MALE		;
		rename	SAQ106_2__6_18_YRS_FEMALE		six18FEMALE		;
		rename	SAQ106_3__19__59_YRS_MALE		nineteen59MALE		;
		rename	SAQ106_3__19__59_YRS_FEMALE		nineteen59FEMALE		;
		rename	SAQ106_4__60__YRS_MALE		sixtyMALE		;
		rename	SAQ106_4__60__YRS_FEMALE		sixtyFEMALE		;
		rename	SAQ107_1_PREGNANT		pregnant		;
		rename	SAQ107_2_LACTATING		lactating		;
		rename	SAQ108		Hcfac		;	label define yesno 1 "Yes" 2 "No"	;	label values Hcfac yesno	;
		rename	SAQ109		Hccomplain		;		;	label values Hccomplain yesno	;
		rename	SBQ200		incomebus		;
		rename	SBQ201_1__COWS		cows		;
		rename	SBQ201_2__SHEEP		sheep		;
		rename	SBQ201_3__GOAT		goats		;
		rename	SBQ201_4__CHICKENS		chickens		;
		rename	SBQ201_5__BEEHIVES		beehives		;
		rename	SBQ201_6_OTHER		otheranimal		;
		rename	SBQ201_7_SPECIFY		numotheran		;
		rename	SBQ202		latrine		;	label define Latrine 1 "None" 2 "VIP" 3 "TradLatr" 4 "OthLatr"	;	label values latrine Latrine	;
		rename	SBQ202__SPECIFY		othelatr		;
		rename	SBQ203		roof		;	label define Roof 1 "corr" 2 "thatch" 3 "OthRoof"	;	label values roof Roof	;
		rename	SBQ203_B_SPECIFY		otherroof		;
		rename	SBQ204		roomsHH		;
		rename	SBQ205		kitchen		;			label values kitchen yesno	;
		rename	SBQ206		stable		;			label values stable yesno	;
		rename	SBQ207		housemater		;	label define Hmat 1 "wood" 2 "mud" 3 "cement" 4 "othrmat"	;	label values housemater Hmat	;
		rename	SBQ207_B_SPECIFY		housematoth		;
		rename	SBQ208_A		tv		;			label values tv yesno	;
		rename	SBQ208_B		radio		;			label values radio yesno	;
		rename	SBQ208_C		mattress		;			label values mattress yesno	;
		rename	SBQ208_D		chairtable		;			label values chairtable yesno	;
		rename	SBQ208_E		car		;			label values car yesno	;
		rename	SBQ208_F		moto		;			label values moto yesno	;
		rename	SCQ300		famhealth		;	label define HHSHA 1 "Very Poor" 2 "Poor" 3 "Medium" 4 "Good" 5 "Very Good"	;	label values famhealth HHSHA	;
		rename	SCQ301		famchronic		;			label values famchronic yesno	;
		rename	SCQ302		ill3mo		;			label values ill3mo yesno	;
		rename	SCQ303		numill3mo		;
		rename	SCQ304		HEuse3mo		;		;	label values HEuse3mo yesno	;
		rename	SCQ305		treat3mo		;		;	label values treat3mo yesno	;
		rename	SCQ306		HCTreat		;	label define HCTreat 1"self" 2 "local drug" 3 "privHF" 4 "publicHC" 5 "pubhosp" 6 "tradheal" 7 "other"	;	label values HCTreat HETreat	;
		rename	SCQ306_B_SPECIFY		HCTreatOther		;
		rename	SCQ307		HCReason		;	label define HCReason 1 "HFAccess" 2 "HFCheap" 3 "HFnotcrowd" 4 "HFcourteous" 5 "HFeffect" 6"HFOther"	;	label values HCReason HCReason	;
		rename	SCQ307_B_SPECIFY		HCReasonOth		;
		rename	SCQ308		whynotreat		;	label define Whynotreat 1 "selflimitill" 2 "notmoney" 3 "notknow" 4 "Notime" 5 "Toofar" 6 "Other" 7 "Unkonwn"	;	label values whynotreat Whynotreat	;
		rename	SCQ308_B_SPECIFY		whynotreatoth		;
		rename	SCQ309		HCcost3mo		;
		rename	SCQ310		HCpay		;	label define HCpay 1 "self" 2 "family" 3 "govnt" 4 "community" 5 "others"	;	label values HCpay HCpay	;
		rename	SCQ310_B_SPECIFY		HCpaythoth		;
		rename	SCQ311		HCsatisfied		;	label define HCsatisfied 1 "very satisf" 2 "disatisfied" 3 "neutral" 4 "satisfied" 5 "very satisf"	;	label values HCsatisfied HCsatisfied	;
		rename	SCQ312		HCquality		;	label define HCquality 1 "very low" 2 "Low" 3 "neutral" 4 "High" 5 "very high"	;	label values HCquality Hcquality	;
		rename	SCQ313		HCdiffpay		;	label define Hcdiffpay 1 "very difficult" 2 "difficult" 3 "not difficult"	;	label values HCdiffpay Hcdiffpay	;
		rename	SCQ314		HCsourcepay		;	label define HCsourcepay 1 "savings" 2 "borrow" 3 "relatives" 4 "extrawork" 5 "sell assets" 6 "substituteoth" 7 "others"	;	label values HCsourcepay HCsourcepay	;
		rename	SCQ314_B_SPECIFY		HCsourceoth		;
		rename	SCQ315		HCborrow1year		;			label values HCborrow1year yesno	;
		rename	SCQ316		HCborrowmuch		;
		rename	SCQ317		HCnearest		;	label define HCnearest 1 "HealthCent" 2 "Clinicprivt" 3 "Hosp"	;	label values HCnearest HCnearest	;
		rename	SCQ318		HCTimehome		;
		rename	SCQ319		Hctransport		;	label define HCtransport 1 "priv_vehicle" 2 "pub transpt" 3 "ambulance" 4 "moto" 5 "bike" 6 "other"	;	label values Hctransport HCtransport	;
		rename	SCQ319_B_SPECIFY		Hctransportoth		;
		rename	SDQ400		WillingjoinHI		;		;	label values WillingjoinHI yesno	;
		rename	SDQ401		joinHIwhy		;	label define joinHIwhy 1 "AccessHC" 2 "HelpOth" 3 "Safety" 4 "IllHealth" 5 "others"	;	label values joinHIwhy joinHIwhy	;
		rename	SDQ401_B_SPECIFY		joinHIwhyoth		;
		rename	SDQ402		notjoinHIwhy		;	label define notjoinHIwhy 1 "notmoney" 2 "notneed" 3 "OOPbetter" 4 "lacktrustGv" 5 "lackHFarea" 6 "noqualifHF" 7 "taboopayadv" 8 "scopelimit" 9 "others"	;	label values notjoinHIwhy notjoinHIwhy	;
		rename	SDQ402_B_SPECIFY		notjoinHIwhyoth		;
		rename	SEQ500		HIfreqpay		;	label define HIfreqpay 1 "monthly" 2 "quarterly" 3 "half-yearly" 4 "yearly" 5 "other"	;	label values HIfreqpay HIfreqpay	;
		rename	SEQ500_B_SPECIFY		HIfreqpayoth		;
		rename	SEQ501		Yes20000Le		;		;	label values Yes20000Le yesno	;
		rename	SEQ502		Yes30000Le		;		;	label values Yes30000Le yesno	;
		rename	SEQ503		Yes10000Le		;		;	label values Yes10000Le yesno	;
		rename	SEQ504		MaxHILe		;		;
		rename	SEQ505		WhynoHI		;	label define WhynoHI 1 "trustmanag" 2 "shouldbegov" 3 "toopoor" 4 "wealthypay" 5 "other"	;	label values WhynoHI WhynoHI	;
		rename	SEQ505_B_SPECIFY		WhynoHIoth		;

## Sheet: TimeTransformation
			HCTimehome		Separating	Hrs to Min	Dividing Km	HCTimehome2	NASSIT_ID
									433
									499
									4109
									10619
									4109
									3647
			30miny	30		30	30	30	1465
						0	0	0	3584
						0	0	0	1243
						0	0	0	1500
			5	5		5	5	5	11318
						0	0	0
			5mintu	5		5	5	5	1464
			20 MIN	20		20	20	20	1902
			1 hur	1	60	60	60	60	861
			40	40		40	40	40	442
			20MIN	20		20	20	20	515
			20MIN	20		20	20	20	515
			10	10		10	10	10	3596
						0	0	0	363
			10MIN	10		10	10	10	338
						0	0	0	64
						0	0	0	64
			5	5		5	5	5	1487
						0	0	0	1451
			10MIN	10		10	10	10	106
			5	5		5	5	5	243
			2 MIN4	2 4		24	24	24	145
			10MIN	10		10	10	10	378
			2 MIN4	2 4		24	24	24	2217
			10MIN	10		10	10	10	106
			60	60		60	60	60	10147
			50MIN	50		50	50	50	61
			50MIN	50		50	50	50	61
			20	20		20	20	20	3626
			5	5		5	5	5	10892
			25 MIN	25		25	25	25	1004
			40 min	40		40	40	40	17200
			40 min	40		40	40	40	17200
			10	10		10	10	10	1486
						0	0	0	1455
						0	0	0	1455
			4	4		4	4	4	10375
			60minu	60		60	60	60	768
			40	40		40	40	40	10320
			5	5		5	5	5	10895
			9	9		9	9	9	272
			15MIN	15		15	15	15	4294
			30	30		30	30	30	488
			30MIN	30		30	30	30	4030
			15MIN	15		15	15	15	4294
			20	20		20	20	20	1494
			20	20		20	20	20	996
			5minut	5		5	5	5	999
			15 min	15		15	15	15	2457
			10	10		10	10	10	532
			30	30		30	30	30	403
			25	25		25	25	25	46
			4MIN	4		4	4	4	10542
			10	10		10	10	10	42
						0	0	0	863
			5MINTU	5		5	5	5	1017
			30MIN	30		30	30	30	346
			30MIN	30		30	30	30	346
			25 min	25		25	25	25	289
			25 min	25		25	25	25	289
						0	0	0	526
						0	0	0	2092
			1HRS	1	60	60	60	60	4337
			60	60		60	60	60	471
			5	5		5	5	5	1236
			10	10		10	10	10	1319
			10MIN	10		10	10	10	3267
			5	5		5	5	5	2211
			45000	45000		45000	450	450	169
			10	10		10	10	10	998
			5minut	5		5	5	5	1000
			120	120		120	120	120	389
			120	120		120	120	120	1094
			7	7		7	7	7	1318
			10	10		10	10	10	10572
			10 MIN	10		10	10	10	679
			20	20		20	20	20	1977
			10	10		10	10	10	84
			5	5		5	5	5	1016
			8	8		8	8	8	1325
			240	240		240	240	240	10417
			15 MIN	15		15	15	15	1681
			7	7		7	7	7	10966
			16	16		16	16	16	274
			25 MIN	25		25	25	25	387
			20MIN	20		20	20	20	1006
			30	30		30	30	30	543
			30	30		30	30	30	11302
			90 MIN	90		90	90	90	1921
			90 min	90		90	90	90	1926
			30MIN	30		30	30	30	11097
			30MIN	30		30	30	30	11097
			15	15		15	15	15	11170
			10	10		10	10	10	11321
			30	30		30	30	30	10955
			15	15		15	15	15	20
			10	10		10	10	10	151
			120	120		120	120	120	3244
			10	10		10	10	10	177
			10	10		10	10	10	179
			30MIN	30		30	30	30	87
			30MIN	30		30	30	30	87
			15	15		15	15	15	114
						0	0	0	295
						0	0	0	3487
						0	0	0	35
			40	40		40	40	40	10513
			16	16		16	16	16	240
			15 MIN	15		15	15	15	233
			30 MIN	30		30	30	30	42
			30 MIN	30		30	30	30	42
			1 HR	1	60	60	60	60	319
			1 HR	1	60	60	60	60	2073
			30 MIN	30		30	30	30	380
			120	120		120	120	120	3641
			50	50		50	50	50	3638
			10	10		10	10	10	505
			1 HR	1	60	60	60	60	345
			1 HR	1	60	60	60	60	2072
			10minu	10		10	10	10	875
			15 MIN	15		15	15	15	1702
			20 MIN	20		20	20	20	390
			60	60		60	60	60	3632
			17 MIN	17		17	17	17	924
			35 MIN	35		35	35	35	384
			30	30		30	30	30	3608
			1 HOUR	1	60	60	60	60	324
			30	30		30	30	30	3630
			30 MIN	30		30	30	30	365
			10MIN	10		10	10	10	3085
			10MIN	10		10	10	10	3085
			30 MIN	30		30	30	30	306
			10	10		10	10	10	10409
			30	30		30	30	30	2772
			4mintu	4		4	4	4	1589
						0	0	0	495
			2	2		2	2	2	10578
			5min	5		5	5	5	522
			2 min	2		2	2	2	1102
			2 min	2		2	2	2	43
			10MIN	10		10	10	10	954
			15MINU	15		15	15	15	1519
			10MIN	10		10	10	10	954
			4MIN	4		4	4	4	102
			4MIN	4		4	4	4	102
			10MIN	10		10	10	10	2025
			10	10		10	10	10	546
			55	55		55	55	55	194
			20MIN	20		20	20	20	3317
			15MIN	15		15	15	15	33
						0	0	0	3460
						0	0	0	1134
			15MIN	15		15	15	15	33
			20MIN	20		20	20	20	2028
						0	0	0	36
			6	6		6	6	6	10621
			1 HOUR	1	60	60	60	60	11154
						0	0	0	5330
			1 HR	1	60	60	60	60	209
			30 MIN	30		30	30	30	220
			10	10		10	10	10	3479
			225	225		225	225	225	808
			5	5		5	5	5	1104
			20	20		20	20	20	171
			30	30		30	30	30	10115
			45MINS	45		45	45	45	13900
			15	15		15	15	15	155
			30MIN	30		30	30	30	11155
			45MIN	45		45	45	45	11144
			20	20		20	20	20	2226
			60MIN	60		60	60	60	773
			120	120		120	120	120	315
			120	120		120	120	120	297
			60	60		60	60	60	398
			30min	30		30	30	30	3110
			60MIN	60		60	60	60	773
			1HOUR	1	60	60	60	60	11090
			1HOUR	1	60	60	60	60	11090
			15	15		15	15	15	10301
			10	10		10	10	10	167
			10MIN	10		10	10	10	1041
			10	10		10	10	10	94
						0	0	0	3459
			10MIN	10		10	10	10	1041
			1HOUR	1	60	60	60	60	11104
			5MIN	5		5	5	5	11192
			5	5		5	5	5	435
			1HOUR	1	60	60	60	60	11104
			5	5		5	5	5	1100
			30MIN	30		30	30	30	11150
						0	0	0	3447
			30	30		30	30	30	770
			10	10		10	10	10	220
			10	10		10	10	10	447
			1HOUR	1	60	60	60	60	11095
			10	10		10	10	10	10119
			50	50		50	50	50	263
			30MIN	30		30	30	30	8749
			10	10		10	10	10	1447
			30MIN	30		30	30	30	8749
			35	35		35	35	35	140
			10MIN	10		10	10	10	1037
			10MIN	10		10	10	10	1044
			5	5		5	5	5	10313
						0	0	0	3474
			1	1		1	1	1	166
						0	0	0	3452
			15	15		15	15	15	16
			10 mui	10		10	10	10	2463
			1HOUR	1	60	60	60	60	11108
			1HOUR	1	60	60	60	60	11108
			35 MIN	35		35	35	35	441
			24 min	24		24	24	24	288
			24 min	24		24	24	24	288
			12	12		12	12	12	278
			15	15		15	15	15	198
			30MIN	30		30	30	30	2147
			20 min	20		20	20	20	9075
			1 HR	1	60	60	60	60	228
			30 MIN	30		30	30	30	229
			1HOUR	1	60	60	60	60	11095
			10	10		10	10	10	1485
			40	40		40	40	40	3583
			40	40		40	40	40	3583
			30MIN	30		30	30	30	2023
			5	5		5	5	5	1232
			10	10		10	10	10	81
			30MIN	30		30	30	30	11150
			15mins	15		15	15	15	1297
			10	10		10	10	10	553
			10	10		10	10	10	745
			30MIN	30		30	30	30	11110
						0	0	0	2021
			15	15		15	15	15	42
			10MIN	10		10	10	10	1035
			20 min	20		20	20	20	30
			25 MIN	25		25	25	25	308
			30 MIN	30		30	30	30	318
			25 MIN	25		25	25	25	2208
			1 HR	1	60	60	60	60	234
			20	20		20	20	20	1
			5MIN	5		5	5	5	5334
			25 min	25		25	25	25	15200
			25 min	25		25	25	25	15200
			25MIN	25		25	25	25	30066
			40MIN	40		40	40	40	11107
			40MIN	40		40	40	40	11107
			15	15		15	15	15	1082
			25MIN	25		25	25	25	30066
			15 MIN	15		15	15	15	11
			15 MIN	15		15	15	15	11
			15	15		15	15	15	128
			30	30		30	30	30	10721
			3	3		3	3	3	1165
			30MIN	30		30	30	30	2023
			1 HOUR	1	60	60	60	60	66
			10 MIN	10		10	10	10	125
			1 HOUR	1	60	60	60	60	51
			60MIN	60		60	60	60	12163
			60MIN	60		60	60	60	12163
						0	0	0	3449
						0	0	0	3470
			45	45		45	45	45	757
			25	25		25	25	25	10601
			30MIN	30		30	30	30	11110
						0	0	0	2021
			15 MIN	15		15	15	15	30
			10 MIN	10		10	10	10	32
			10 MIN	10		10	10	10	125
			15 MIN	15		15	15	15	30
			10 MIN	10		10	10	10	32
			10000	10000		10000	100	100	445
			1 HOUR	1	60	60	60	60	51
			1 HOUR	1	60	60	60	60	66
			10MIN	10		10	10	10	1035
			60 MIN	60		60	60	60	1403
			30	30		30	30	30	2207
			50	50		50	50	50	318
			20	20		20	20	20	1957
			30	30		30	30	30	1980
			20 MIN	20		20	20	20	14001
			5min	5		5	5	5	3023
			45	45		45	45	45	3617
						0	0	0	206
			20	20		20	20	20	2016
			120	120		120	120	120	62
			5	5		5	5	5	10310
			10	10		10	10	10	1219
			30 min	30		30	30	30	9074
			75	75		75	75	75	3595
			40	40		40	40	40	306
			30 min	30		30	30	30	29
			20MIN	20		20	20	20	2028
			45 MIN	45		45	45	45	1056
			20	20		20	20	20	974
			10MIN	10		10	10	10	1044
			35	35		35	35	35	3644
			10	10		10	10	10	98
			10MIN	10		10	10	10	1037
			25	25		25	25	25	27
			15	15		15	15	15	35
			20	20		20	20	20	346
			25MIN	25		25	25	25	2025
			240	240		240	240	240	31
			19 MIN	19		19	19	19	2313
			5	5		5	5	5	1010
			50	50		50	50	50	163
			1hr	1	60	60	60	60	3041
						0	0	0	3446
			15	15		15	15	15	1194
						0	0	0	2234
			20	20		20	20	20	2010
			68	68		68	68	68	69
			15	15		15	15	15	314
			10	10		10	10	10	2225
			25	25		25	25	25	274
			15	15		15	15	15	1991
			7	7		7	7	7	280
			2	2		2	2	2	10521
			15 MIN	15		15	15	15	251
			20	20		20	20	20	159
			25 MIN	25		25	25	25	252
			10	10		10	10	10	2228
			10	10		10	10	10	11157
			20	20		20	20	20	11305
			30	30		30	30	30	11286
			30	30		30	30	30	11284
			30	30		30	30	30	11298
						0	0	0	10956
			10min	10		10	10	10	10691
			10	10		10	10	10	11312
			10	10		10	10	10	11201
			20	20		20	20	20	11301
			10	10		10	10	10	11315
						0	0	0	11283
			45	45		45	45	45	163
			15	15		15	15	15	11217
			40	40		40	40	40	11293
			20	20		20	20	20	11174
			20	20		20	20	20	11172
			5	5		5	5	5	468
			30	30		30	30	30	11292
			50	50		50	50	50	11296
			40	40		40	40	40	11287
			10	10		10	10	10	11215
			8	8		8	8	8	11190
			10	10		10	10	10	10951
			20	20		20	20	20	10948
			65	65		65	65	65	176
			15	15		15	15	15	11177
			10	10		10	10	10	1504
			15	15		15	15	15	11320
			15	15		15	15	15	11309
			30	30		30	30	30	11300
			15	15		15	15	15	10947
			30	30		30	30	30	11193
			15	15		15	15	15	11179
			5min	5		5	5	5	10682
			15	15		15	15	15	11187
			10	10		10	10	10	10949
			30	30		30	30	30	11294
						0	0	0	11206
						0	0	0	11280
			10	10		10	10	10	11316
			30	30		30	30	30	11306
			30	30		30	30	30	11279
			10	10		10	10	10	11218
			20	20		20	20	20	11212
						0	0	0	11182
			10	10		10	10	10	11180
						0	0	0	11281
			10	10		10	10	10	11291
			45	45		45	45	45	11285
			30	30		30	30	30	11288
			10	10		10	10	10	11194
			5	5		5	5	5	11221
			20	20		20	20	20	11197
			10	10		10	10	10	174
			130	130		130	130	130	11497
			40	40		40	40	40	11319
			10	10		10	10	10	11219
			10	10		10	10	10	11214
			30	30		30	30	30	11213
			10	10		10	10	10	11208
			15	15		15	15	15	11307
			10	10		10	10	10	11324
			15	15		15	15	15	11274
						0	0	0	11200
			10	10		10	10	10	991
						0	0	0	284
			10	10		10	10	10	11310
			15	15		15	15	15	11276
			15	15		15	15	15	11275
			10	10		10	10	10	11220
						0	0	0	1503
			15	15		15	15	15	10959
			10	10		10	10	10	10649
						0	0	0	10615
			30	30		30	30	30	11311
			5	5		5	5	5	11159
			5	5		5	5	5	11158
			10	10		10	10	10	10953
			45	45		45	45	45	139
			10	10		10	10	10	156
			10	10		10	10	10	10958
			30 MIN	30		30	30	30	452
			5	5		5	5	5	11171
			5	5		5	5	5	10640
			15	15		15	15	15	10954
			15	15		15	15	15	477
			5	5		5	5	5	11414
			50	50		50	50	50	391
			40	40		40	40	40	580
			40	40		40	40	40	136
			75	75		75	75	75	173
			30	30		30	30	30	10678
			40 MIN	40		40	40	40	1006
			35 MIN	35		35	35	35	1013
			120	120		120	120	120	337
			15MIN	15		15	15	15	12249
			15MIN	15		15	15	15	12249
			30 MIN	30		30	30	30	1073
			30	30		30	30	30	10670
			30	30		30	30	30	180
			30	30		30	30	30	10643
			15	15		15	15	15	23
			1	1		1	1	1	10303
			30	30		30	30	30	10677
			15MIN	15		15	15	15	12029
						0	0	0	10610
			15	15		15	15	15	10692
			60	60		60	60	60	10896
			20	20		20	20	20	100
			5	5		5	5	5	11416
						0	0	0	311
			30	30		30	30	30	10679
						0	0	0	10703
						0	0	0	10691
			30	30		30	30	30	10674
			60	60		60	60	60	510
			15	15		15	15	15	1198
			10MIN	10		10	10	10	12048
			10MIN	10		10	10	10	12048
			30	30		30	30	30	10672
			40MIN	40		40	40	40	3029
			40MIN	40		40	40	40	3029
			30	30		30	30	30	10668
			5	5		5	5	5	281
			30	30		30	30	30	11605
			10 MIN	10		10	10	10	1742
			10	10		10	10	10	256
			10	10		10	10	10	90
			5	5		5	5	5	10363
						0	0	0	515
			15MINS	15		15	15	15	1202
			240	240		240	240	240	10387
			8	8		8	8	8	10504
			25	25		25	25	25	10494
			35	35		35	35	35	10491
						0	0	0	522
			60	60		60	60	60	521
			60	60		60	60	60	523
						0	0	0	10395
			60	60		60	60	60	524
						0	0	0	11700
						0	0	0	3441
			10MIN	10		10	10	10	3298
			10MIN	10		10	10	10	178
			5	5		5	5	5	10967
			10MIN	10		10	10	10	178
			30 MIN	30		30	30	30	888
			20	20		20	20	20	138
			20	20		20	20	20	119
			1	1		1	1	1	21
			10 MIN	10		10	10	10	14016
			30MIN	30		30	30	30	473
			10	10		10	10	10	405
			30	30		30	30	30	11657
			10	10		10	10	10	11330
			30 MIN	30		30	30	30	1017
			15	15		15	15	15	2209
			10	10		10	10	10	377
			15min	15		15	15	15	718
			20	20		20	20	20	11192
			60	60		60	60	60	1457
			50 MIN	50		50	50	50	710
			25MIN	25		25	25	25	763
			120	120		120	120	120	151
			30MIN	30		30	30	30	3340
			10 min	10		10	10	10	104
			2	2		2	2	2	10489
			60	60		60	60	60	2768
			60	60		60	60	60	10206
			10	10		10	10	10	11627
			30 MIN	30		30	30	30	24
			30 MIN	30		30	30	30	24
			15	15		15	15	15	11535
			15MIN	15		15	15	15	3116
			35	35		35	35	35	204
						0	0	0	753
			30	30		30	30	30	537
			45 min	45		45	45	45	11000
			45 min	45		45	45	45	11000
			60MIN	60		60	60	60	12046
			1 HOUR	1	60	60	60	60	937
			90 MIN	90		90	90	90	1486
			2 HOUR	2	60	120	120	120	88
			2 HOUR	2	60	120	120	120	88
			30	30		30	30	30	8
			10	10		10	10	10	1212
			90	90		90	90	90	3585
			5 MIN	5		5	5	5	108
			5 MIN	5		5	5	5	108
			50 MIN	50		50	50	50	935
			15MIN	15		15	15	15	3449
			30	30		30	30	30	11604
			45 min	45		45	45	45	13500
			10MIN	10		10	10	10	12051
			10MIN	10		10	10	10	1003
			10MIN	10		10	10	10	12051
						0	0	0	2208
			10MIN	10		10	10	10	1003
			45 min	45		45	45	45	1143
			1 hrs	1	60	60	60	60	21700
			1 hrs	1	60	60	60	60	21700
						0	0	0	3471
			10MIN	10		10	10	10	4098
			10MIN	10		10	10	10	4098
			10	10		10	10	10	31
			1 HOUR	1	60	60	60	60	337
			1 HOUR	1	60	60	60	60	396
			30MIN	30		30	30	30	473
			20	20		20	20	20	10736
			1 hur	1	60	60	60	60	405
			40MIN	40		40	40	40	4086
			40MIN	40		40	40	40	4086
			40	40		40	40	40	420
			40	40		40	40	40	341
			10 MIN	10		10	10	10	950
			7MIN	7		7	7	7	4150
			7MIN	7		7	7	7	4150
			15MIN	15		15	15	15	12132
			20000	20000		20000	200	200	10321
			15	15		15	15	15	11602
			25	25		25	25	25	2008
			10	10		10	10	10	1191
			10MIN	10		10	10	10	11130
			45	45		45	45	45	212
			1 hr	1	60	60	60	60	20900
			1 hr	1	60	60	60	60	20900
			10 MIN	10		10	10	10	936
			25	25		25	25	25	10505
			15	15		15	15	15	91
			90mon	90		90	90	90	2659
			90min	90		90	90	90	2658
			4	4		4	4	4	10964
			37 MIN	37		37	37	37	922
			45 MIN	45		45	45	45	1044
			10mile	16000		16000	160	160	1454
			1 HOUR	1	60	60	60	60	1703
			15	15		15	15	15	10729
			25	25		25	25	25	11587
						0	0	0	2204
			5MIN	5		5	5	5	795
			5MIN	5		5	5	5	795
			120	120		120	120	120	10397
			240	240		240	240	240	43
			30 MIN	30		30	30	30	882
			5MIN	5		5	5	5	12170
			5MIN	5		5	5	5	12170
			5MIN	5		5	5	5	12170
						0	0	0	10401
			720	720		720	720	720	10748
			20	20		20	20	20	10768
			720	720		720	720	720	10413
			240	240		240	240	240	10759
						0	0	0	1178
			80	80		80	80	80	10738
			10min	10		10	10	10	918
			240	240		240	240	240	10763
			40	40		40	40	40	10408
						0	0	0	10767
			20	20		20	20	20	11645
			30	30		30	30	30	10100
			10 MIN	10		10	10	10	14037
			3	3		3	3	3	10300
			40	40		40	40	40	160
			25	25		25	25	25	166
			15MIN	15		15	15	15	12209
			10	10		10	10	10	56
						0	0	0	3443
			10	10		10	10	10	1466
			5	5		5	5	5	1449
			10	10		10	10	10	1450
			1 hrs	1	60	60	60	60	47
			10	10		10	10	10	88
			20	20		20	20	20	93
			10	10		10	10	10	10102
			60	60		60	60	60	266
			10MIN	10		10	10	10	337
			10	10		10	10	10	351
			180	180		180	180	180	216
			30	30		30	30	30	279
			5	5		5	5	5	268
			10	10		10	10	10	271
			120	120		120	120	120	236
			6	6		6	6	6	190
			5	5		5	5	5	192
			6	6		6	6	6	245
			5	5		5	5	5	189
			15	15		15	15	15	177
			30	30		30	30	30	183
			20	20		20	20	20	195
			25	25		25	25	25	201
			10	10		10	10	10	226
			30	30		30	30	30	235
			20	20		20	20	20	171
			20	20		20	20	20	172
			30	30		30	30	30	100
			1 hrs	1	60	60	60	60	1106
			15	15		15	15	15	125
			1MIN	1		1	1	1	474
			15 MIN	15		15	15	15	134
			30 MIN	30		30	30	30	518
			1MIN	1		1	1	1	474
			15 MIN	15		15	15	15	134
			5	5		5	5	5	11185
			5	5		5	5	5	10661
			20	20		20	20	20	1461
			60	60		60	60	60	176
			20	20		20	20	20	204
			15	15		15	15	15	224
			30	30		30	30	30	237
			20	20		20	20	20	247
			20	20		20	20	20	13
			30	30		30	30	30	11290
			30	30		30	30	30	10594
			30	30		30	30	30	11314
			20	20		20	20	20	11191
			10	10		10	10	10	10551
			25	25		25	25	25	249
			1	1		1	1	1	10326
						0	0	0	193
			20MIN	20		20	20	20	10680
			5MIN	5		5	5	5	125
			5MIN	5		5	5	5	125
			3MIN	3		3	3	3	284
			3MIN	3		3	3	3	284
						0	0	0	4493
						0	0	0	4493
			2	2		2	2	2	4496
			8MIIN	8		8	8	8	12444
			2MIIN	2		2	2	2	1145
			5min	5		5	5	5	10683
			10MIN	10		10	10	10	3158
			8MIIN	8		8	8	8	12444
			2MIIN	2		2	2	2	1145
			10MIN	10		10	10	10	3158
			5MIN	5		5	5	5	248
			5MIN	5		5	5	5	248
			70	70		70	70	70	10449
			10	10		10	10	10	11384
			2	2		2	2	2	10624
			40	40		40	40	40	208
			25 MIN	25		25	25	25	992
			5	5		5	5	5	431
			20MIN	20		20	20	20	2024
			20MIN	20		20	20	20	2024
			10	10		10	10	10	1214
						0	0	0	1131
						0	0	0	38
			240	240		240	240	240	10762
			1HRS	1	60	60	60	60	3153
			10	10		10	10	10	194
			60	60		60	60	60	10348
			1hrs	1	60	60	60	60	3111
			30	30		30	30	30	189
			5MIN	5		5	5	5	259
			5MIN	5		5	5	5	259
			40	40		40	40	40	186
			15	15		15	15	15	1086
			10MIN	10		10	10	10	371
			5	5		5	5	5	10586
			10	10		10	10	10	43
						0	0	0	305
			30	30		30	30	30	203
			30	30		30	30	30	195
			10MIN	10		10	10	10	332
			10	10		10	10	10	213
			5	5		5	5	5	423
			10	10		10	10	10	61
						0	0	0	194
			20	20		20	20	20	236
			20	20		20	20	20	245
			10MIN	10		10	10	10	4004
			2	2		2	2	2	11385
			10MIN	10		10	10	10	3006
			45	45		45	45	45	10364
			15 min	15		15	15	15	869
			1	1		1	1	1	30
			10min	10		10	10	10	3030
			10MIN	10		10	10	10	262
						0	0	0	10888
			2	2		2	2	2	134
			20	20		20	20	20	565
			40	40		40	40	40	203
			5MIN	5		5	5	5	3352
			15MIN	15		15	15	15	258
			15MIN	15		15	15	15	258
			20MIN	20		20	20	20	3003
			25 min	25		25	25	25	14700
			25 min	25		25	25	25	14700
			20	20		20	20	20	310
			30	30		30	30	30	11205
						0	0	0	3492
						0	0	0	349
			25	25		25	25	25	278
			10	10		10	10	10	466
			1	1		1	1	1	11491
			20	20		20	20	20	133
			5MIN	5		5	5	5	12177
			25MIN	25		25	25	25	3111
			10MIN	10		10	10	10	3338
			40MIN	40		40	40	40	3356
			19 min	19		19	19	19	27
			10	10		10	10	10	195
			5	5		5	5	5	1061
			10MIN	10		10	10	10	370
			10000	10000		10000	100	100	348
						0	0	0	352
			20	20		20	20	20	508
			15	15		15	15	15	615
			20	20		20	20	20	388
			40MIN	40		40	40	40	302
			18MIN	18		18	18	18	52
			30MIN	30		30	30	30	5113
			15	15		15	15	15	11202
			10	10		10	10	10	248
			25	25		25	25	25	135
			19 min	19		19	19	19	9072
			10MIN	10		10	10	10	3069
			18MIN	18		18	18	18	52
			30MIN	30		30	30	30	5113
			10	10		10	10	10	225
			10	10		10	10	10	10366
			10	10		10	10	10	10365
			5	5		5	5	5	10349
			20	20		20	20	20	130
			30	30		30	30	30	93
						0	0	0	14036
			30	30		30	30	30	250
			10MIN	10		10	10	10	342
			5	5		5	5	5	366
			10	10		10	10	10	356
			10	10		10	10	10	334
			60	60		60	60	60	472
			8	8		8	8	8	519
			18	18		18	18	18	264
			10min	10		10	10	10	439
			10	10		10	10	10	440
			10	10		10	10	10	10483
			20	20		20	20	20	242
			10	10		10	10	10	256
			10MIN	10		10	10	10	3069
			3	3		3	3	3	381
			2	2		2	2	2	10623
			1	1		1	1	1	10622
			2	2		2	2	2	11383
			1	1		1	1	1	11495
			1	1		1	1	1	11488
			10MIN	10		10	10	10	11021
			10MIN	10		10	10	10	11021
			10MIN	10		10	10	10	11021
			5MIN	5		5	5	5	313
			5MIN	5		5	5	5	12177
			5MIN	5		5	5	5	313
			4MIN	4		4	4	4	603
			40	40		40	40	40	117
			15MIN	15		15	15	15	70
			15MIN	15		15	15	15	70
			3min	3		3	3	3	39
			3min	3		3	3	3	9087
			40	40		40	40	40	116
						0	0	0	108
						0	0	0	108
			5MIN	5		5	5	5	4009
			5MIN	5		5	5	5	3306
			45	45		45	45	45	22
			1	1		1	1	1	205
			5	5		5	5	5	1515
			5MIN	5		5	5	5	5067
			10MIN	10		10	10	10	4032
			5	5		5	5	5	10645
			10min	10		10	10	10	681
			90min	90		90	90	90	3056
			2	2		2	2	2	471
			120	120		120	120	120	426
			10	10		10	10	10	467
			10	10		10	10	10	701
			5MIN	5		5	5	5	1032
			5MIN	5		5	5	5	1032
			15MIN	15		15	15	15	143
			5MIN	5		5	5	5	145
			15MIN	15		15	15	15	143
			5MIN	5		5	5	5	145
			17	17		17	17	17	276
						0	0	0	3490
			40	40		40	40	40	181
			8min	8		8	8	8	10485
			20MIN	20		20	20	20	256
			10	10		10	10	10	26
			10MN	10		10	10	10	6258
			10MIN	10		10	10	10	3120
			35mins	35		35	35	35	11
			10	10		10	10	10	165
			10MIN	10		10	10	10	346
			25MIN	25		25	25	25	336
			5	5		5	5	5	363
			10	10		10	10	10	350
			10MIN	10		10	10	10	51
			5MIN	5		5	5	5	11039
						0	0	0	11278
			15	15		15	15	15	11189
			15	15		15	15	15	11178
			8	8		8	8	8	549
			3	3		3	3	3	554
			55	55		55	55	55	181
			5MIN	5		5	5	5	11039
			15MIN	15		15	15	15	4352
			5MIN	5		5	5	5	11039
			5	5		5	5	5	1203
			35mins	35		35	35	35	9085
			1 HOUR	1	60	60	60	60	1084
			8	8		8	8	8	499
			15	15		15	15	15	3440
			30	30		30	30	30	1460
			10MIN	10		10	10	10	4091
			15MIN	15		15	15	15	4352
			10MIN	10		10	10	10	51
			10	10		10	10	10	511
			60	60		60	60	60	207
			40	40		40	40	40	10329
			30	30		30	30	30	10362
			30	30		30	30	30	10357
			10	10		10	10	10	10350
			20	20		20	20	20	397
						0	0	0	9
			1	1		1	1	1	379
			10MIN	10		10	10	10	355
			15	15		15	15	15	361
			10	10		10	10	10	548
			45	45		45	45	45	228
			10	10		10	10	10	149
			10	10		10	10	10	238
			33	33		33	33	33	186
			8min	8		8	8	8	10490
			20	20		20	20	20	208
			10	10		10	10	10	248
			10MIN	10		10	10	10	4091
			25MIN	25		25	25	25	2022
			10	10		10	10	10	444
			30	30		30	30	30	10755
			10	10		10	10	10	199
			50	50		50	50	50	544
			15	15		15	15	15	227
			30 min	30		30	30	30	76
			10MIN	10		10	10	10	314
			5MIN	5		5	5	5	3106
			30 min	30		30	30	30	1007
			5MIN	5		5	5	5	3106
			5MIN	5		5	5	5	171
			10MIN	10		10	10	10	141
			5MIN	5		5	5	5	171
			10MIN	10		10	10	10	141
			25 min	25		25	25	25	6
			12	12		12	12	12	10367
			80	80		80	80	80	154
			5MIN	5		5	5	5	4166
			5MIN	5		5	5	5	4166
			15	15		15	15	15	11184
			10	10		10	10	10	11582
			10	10		10	10	10	213
			5MIN	5		5	5	5	3002
			40 MIN	40		40	40	40	991
			40 MIN	40		40	40	40	986
			40 MIN	40		40	40	40	1023
			5MIN	5		5	5	5	131
			5MIN	5		5	5	5	131
			7	7		7	7	7	10983
			5min	5		5	5	5	5041
			25	25		25	25	25	11289
			5	5		5	5	5	11195
			15	15		15	15	15	11134
			10MIN	10		10	10	10	1011
			10MIN	10		10	10	10	1011
			10MIN	10		10	10	10	3370
			35	35		35	35	35	307
			10MIN	10		10	10	10	11092
			2hr	2	60	120	120	120	14033
			10MIN	10		10	10	10	3370
			10 MIN	10		10	10	10	393
			10MIN	10		10	10	10	368
			20	20		20	20	20	509
			90	90		90	90	90	577
			8	8		8	8	8	506
						0	0	0	504
			2	2		2	2	2	389
			30	30		30	30	30	331
			10	10		10	10	10	335
						0	0	0	245
			4	4		4	4	4	247
			5	5		5	5	5	249
			4	4		4	4	4	256
			5	5		5	5	5	258
			4	4		4	4	4	10875
			6	6		6	6	6	10865
			5MIN	5		5	5	5	12260
			55	55		55	55	55	156
			55	55		55	55	55	157
			5000	5000		5000	50	50	429
			10	10		10	10	10	10590
			60MIN	60		60	60	60	216
			15MIN	15		15	15	15	952
			30	30		30	30	30	11492
			10MIN	10		10	10	10	12060
			5MIN	5		5	5	5	12260
			60MIN	60		60	60	60	216
			2hrs	2	60	120	120	120	2854
			85	85		85	85	85	182
			20	20		20	20	20	11471
			40ninu	40		40	40	40	10489
			15	15		15	15	15	10337
			60	60		60	60	60	1205
			20	20		20	20	20	1098
			10 MIN	10		10	10	10	307
			20	20		20	20	20	11199
			5MIN	5		5	5	5	12079
			15	15		15	15	15	11480
			40	40		40	40	40	10314
			5min	5		5	5	5	4146
			5min	5		5	5	5	4146
			6MIN	6		6	6	6	79
			35	35		35	35	35	193
			35	35		35	35	35	183
			40	40		40	40	40	232
			5	5		5	5	5	3026
			20 MIN	20		20	20	20	998
			60	60		60	60	60	356
			24	24		24	24	24	383
			10MIN	10		10	10	10	3346
			30	30		30	30	30	11662
			30	30		30	30	30	11663
			10	10		10	10	10	11629
						0	0	0	112
			5	5		5	5	5	1083
			10 MIN	10		10	10	10	305
			10 MIN	10		10	10	10	395
			10 MIN	10		10	10	10	14038
			10 MIN	10		10	10	10	14041
			15MIN	15		15	15	15	367
			10	10		10	10	10	13008
			10	10		10	10	10	333
			25 min	25		25	25	25	633
			25 min	25		25	25	25	633
			5	5		5	5	5	510
						0	0	0	500
			30	30		30	30	30	10536
			40 min	40		40	40	40	14000
			40MIN	40		40	40	40	55
			30MIN	30		30	30	30	53
			40MIN	40		40	40	40	45
			25MIN	25		25	25	25	76
			15MIN	15		15	15	15	46
			10MIN	10		10	10	10	5050
			30MIN	30		30	30	30	5054
			5MIN	5		5	5	5	11037
			10	10		10	10	10	11136
			15	15		15	15	15	11132
			55	55		55	55	55	199
			75	75		75	75	75	200
			5MIN	5		5	5	5	11037
			20	20		20	20	20	266
			45MIN	45		45	45	45	4035
			1HRS	1	60	60	60	60	4334
			30	30		30	30	30	10680
			5	5		5	5	5	10599
			5MIN	5		5	5	5	11043
			5MIN	5		5	5	5	11037
			5 min	5		5	5	5	24300
			5	5		5	5	5	103
			5	5		5	5	5	99
			15	15		15	15	15	1103
			1hrs	1	60	60	60	60	684
			1hrs	1	60	60	60	60	9084
			10 min	10		10	10	10	1003
			35 MIN	35		35	35	35	1063
			1 HOUR	1	60	60	60	60	1085
			15	15		15	15	15	3444
						0	0	0	2201
						0	0	0	2231
			10	10		10	10	10	66
			10	10		10	10	10	64
			10	10		10	10	10	1475
			10	10		10	10	10	1510
			45MIN	45		45	45	45	4035
			1HRS	1	60	60	60	60	4334
			40MIN	40		40	40	40	55
			30MIN	30		30	30	30	53
			40MIN	40		40	40	40	45
			25MIN	25		25	25	25	76
			15MIN	15		15	15	15	46
			10MIN	10		10	10	10	5050
			30MIN	30		30	30	30	5054
			10min	10		10	10	10	3022
			20 MIN	20		20	20	20	123
			5 min	5		5	5	5	24300
			40 min	40		40	40	40	14000
			10	10		10	10	10	38
			1hr	1	60	60	60	60	14031
			10	10		10	10	10	161
			60	60		60	60	60	10353
			10	10		10	10	10	440
			10	10		10	10	10	10676
			15minu	15		15	15	15	10491
			10MIN	10		10	10	10	285
			15min	15		15	15	15	11190
			1hrs	1	60	60	60	60	86
			10 min	10		10	10	10	72
			10	10		10	10	10	90
			10	10		10	10	10	143
			25	25		25	25	25	158
			60	60		60	60	60	10113
						0	0	0	14039
			15 MIN	15		15	15	15	14043
			30	30		30	30	30	380
			10MIN	10		10	10	10	13004
			30	30		30	30	30	613
			80	80		80	80	80	572
			10	10		10	10	10	574
			40MIN	40		40	40	40	412
			5	5		5	5	5	243
			4	4		4	4	4	248
			5	5		5	5	5	251
			6	6		6	6	6	10866
			5	5		5	5	5	10859
			5	5		5	5	5	10854
			40	40		40	40	40	10309
			10MIN	10		10	10	10	12060
			55	55		55	55	55	227
			75	75		75	75	75	175
			35	35		35	35	35	64
			30	30		30	30	30	65
			5MIN	5		5	5	5	11036
			10MIN	10		10	10	10	11092
			30	30		30	30	30	11490
			2hrs	2	60	120	120	120	379
			5MIN	5		5	5	5	11036
			29	29		29	29	29	209
			10	10		10	10	10	102
			6	6		6	6	6	485
			40MIN	40		40	40	40	412
			20MIN	20		20	20	20	10681
			40MIN	40		40	40	40	5122
			4	4		4	4	4	244
			40MIN	40		40	40	40	5122
			30	30		30	30	30	156
						0	0	0	369
			45	45		45	45	45	129
			30	30		30	30	30	155
			30MIN	30		30	30	30	761
			35	35		35	35	35	799
			10min	10		10	10	10	3027
			35 min	35		35	35	35	20500
			10 MIN	10		10	10	10	306
			35 min	35		35	35	35	20500
			15	15		15	15	15	11277
			5MIN	5		5	5	5	3198
			5MIN	5		5	5	5	12079
			10	10		10	10	10	464
			5MIN	5		5	5	5	3198
			20MIN	20		20	20	20	3115
			10min	10		10	10	10	3121
						0	0	0	446
			10min	10		10	10	10	58
			720	720		720	720	720	10743
			15	15		15	15	15	540
			10min	10		10	10	10	9089
			75	75		75	75	75	184
			70	70		70	70	70	187
			5MIN	5		5	5	5	175
			5MIN	5		5	5	5	175
			15MIN	15		15	15	15	12200
			30 MIN	30		30	30	30	358
			25	25		25	25	25	193
			10MIN	10		10	10	10	5302
			30min	30		30	30	30	14011
			10MIN	10		10	10	10	4090
			10MIN	10		10	10	10	4090
			1 HR	1	60	60	60	60	166
			4	4		4	4	4	10839
			10	10		10	10	10	1477
			20min	20		20	20	20	301
			15	15		15	15	15	1467
			25 MIN	25		25	25	25	1025
			25 MIN	25		25	25	25	1091
			15	15		15	15	15	151
			8	8		8	8	8	503
			60	60		60	60	60	89
			30MIN	30		30	30	30	5121
			5MIN	5		5	5	5	11043
			50 MIN	50		50	50	50	884
			4	4		4	4	4	1404
			10 min	10		10	10	10	860
			30 MIN	30		30	30	30	1919
			30MIN	30		30	30	30	5121
			30MIN	30		30	30	30	11190
			20	20		20	20	20	573
			120	120		120	120	120	339
			5	5		5	5	5	253
			5	5		5	5	5	254
			5	5		5	5	5	10874
			4	4		4	4	4	10870
			5	5		5	5	5	10864
			6	6		6	6	6	10863
			60	60		60	60	60	282
			8	8		8	8	8	11122
			120	120		120	120	120	299
			15	15		15	15	15	197
			60	60		60	60	60	581
			15	15		15	15	15	11482
						0	0	0	11610
						0	0	0	12033
			60	60		60	60	60	474
			4minut	4		4	4	4	10302
			15	15		15	15	15	135
			5MIN	5		5	5	5	435
			5MIN	5		5	5	5	435
			5MIN	5		5	5	5	905
			2MIN	2		2	2	2	162
			5MIN	5		5	5	5	905
			2MIN	2		2	2	2	162
			20MIN	20		20	20	20	1019
			10	10		10	10	10	11196
			15MIN	15		15	15	15	12200
			10	10		10	10	10	158
			5	5		5	5	5	10887
			10	10		10	10	10	10824
			30MIN	30		30	30	30	11122
			30MIN	30		30	30	30	11122
			120	120		120	120	120	349
			55min	55		55	55	55	377
			30	30		30	30	30	11146
			60	60		60	60	60	296
			30MIN	30		30	30	30	11122
			20MIN	20		20	20	20	4096
			40	40		40	40	40	213
			40	40		40	40	40	127
			1 HOUR	1	60	60	60	60	1079
			40 MIN	40		40	40	40	1083
			15	15		15	15	15	1309
			20MIN	20		20	20	20	4096
			10MIN	10		10	10	10	295
			20min	20		20	20	20	14019
			1HRS	1	60	60	60	60	3174
			4	4		4	4	4	242
			4	4		4	4	4	10873
			8	8		8	8	8	10868
			5	5		5	5	5	10861
			5	5		5	5	5	10860
			7	7		7	7	7	10858
			5MIN	5		5	5	5	11036
						0	0	0	374
			20	20		20	20	20	2020
			1HOUR	1	60	60	60	60	11120
			10	10		10	10	10	237
			1	1		1	1	1	38
			20MIN	20		20	20	20	1019
			5MIN	5		5	5	5	12078
			4	4		4	4	4	10841
			4	4		4	4	4	10838
			5	5		5	5	5	10832
			7	7		7	7	7	10823
			40	40		40	40	40	300
						0	0	0	371
			6	6		6	6	6	10566
			5	5		5	5	5	10474
			10	10		10	10	10	11148
			10	10		10	10	10	11125
			3MIN	3		3	3	3	3368
			5MIN	5		5	5	5	12166
			5MIN	5		5	5	5	12166
			4 MIN	4		4	4	4	159
			4 MIN	4		4	4	4	2065
			2	2		2	2	2	186
			10	10		10	10	10	11656
			15	15		15	15	15	11625
			20MIN	20		20	20	20	30162
			60	60		60	60	60	130
						0	0	0	146
			3hrs	3	60	180	180	180	384
			15	15		15	15	15	1088
			1HRS	1	60	60	60	60	4273
						0	0	0	587
			8	8		8	8	8	509
						0	0	0	5059
			60	60		60	60	60	355
						0	0	0	10310
			60	60		60	60	60	10719
			10	10		10	10	10	10583
			5	5		5	5	5	438
			25	25		25	25	25	26
			45 MIN	45		45	45	45	997
			45 MIN	45		45	45	45	1015
						0	0	0	867
			10	10		10	10	10	1196
			5	5		5	5	5	1497
			1HRS	1	60	60	60	60	4273
						0	0	0	5059
			10	10		10	10	10	113
			5min	5		5	5	5	3152
			60	60		60	60	60	354
			10	10		10	10	10	10347
			15	15		15	15	15	10359
						0	0	0	144
			1 HOUR	1	60	60	60	60	392
						0	0	0	360
			60	60		60	60	60	348
			120	120		120	120	120	338
			2HRS	2	60	120	120	120	3173
			6	6		6	6	6	10862
			120	120		120	120	120	333
			120	120		120	120	120	298
						0	0	0	323
			4	4		4	4	4	10511
			5	5		5	5	5	11026
			10	10		10	10	10	68
			10min	10		10	10	10	14078
			1HRS	1	60	60	60	60	3171
			1HRS	1	60	60	60	60	3171
			10min	10		10	10	10	440
			40	40		40	40	40	10321
			40	40		40	40	40	10322
			5MIN	5		5	5	5	12078
			20	20		20	20	20	289
			20MIN	20		20	20	20	4100
			30MIN	30		30	30	30	4103
			40MIN	40		40	40	40	4014
			15	15		15	15	15	11479
			10	10		10	10	10	125
			5	5		5	5	5	1518
			20MIN	20		20	20	20	4100
			30MIN	30		30	30	30	4103
			40MIN	40		40	40	40	4014
			10	10		10	10	10	11188
			17	17		17	17	17	196
			1 hrs	1	60	60	60	60	18500
			1 hrs	1	60	60	60	60	18500
			10MIN	10		10	10	10	4089
			10MIN	10		10	10	10	4089
			5	5		5	5	5	10893
			5	5		5	5	5	10851
			3	3		3	3	3	10837
			5	5		5	5	5	10835
			45 MIN	45		45	45	45	408
			20	20		20	20	20	345
			4	4		4	4	4	10836
			1 HOUR	1	60	60	60	60	970
			2	2		2	2	2	390
			10	10		10	10	10	399
			3	3		3	3	3	375
			60	60		60	60	60	290
			11	11		11	11	11	268
			10	10		10	10	10	176
			10	10		10	10	10	123
			30MIN	30		30	30	30	3275
			1 hur	1	60	60	60	60	403
			20	20		20	20	20	10312
			45	45		45	45	45	87
			35	35		35	35	35	216
			35MIN	35		35	35	35	12037
			30MIN	30		30	30	30	3275
			1HRS	1	60	60	60	60	3155
						0	0	0	139
			120	120		120	120	120	347
			5	5		5	5	5	10857
			30	30		30	30	30	739
			10	10		10	10	10	263
			120	120		120	120	120	291
			5	5		5	5	5	10891
			5	5		5	5	5	10894
			5	5		5	5	5	10828
			5	5		5	5	5	10827
			50	50		50	50	50	11303
			20 MIN	20		20	20	20	1369
			2	2		2	2	2	529
			15	15		15	15	15	9
			15	15		15	15	15	10
			20	20		20	20	20	11
			30	30		30	30	30	2
			10	10		10	10	10	82
			1HRS	1	60	60	60	60	3152
			60	60		60	60	60	10358
			20	20		20	20	20	11646
			20	20		20	20	20	11650
			20	20		20	20	20	11651
			10	10		10	10	10	11655
			15	15		15	15	15	11624
			10	10		10	10	10	11637
			10	10		10	10	10	11639
			1HOUR	1	60	60	60	60	11134
			3MIN	3		3	3	3	3354
			1hr	1	60	60	60	60	14005
			40min	40		40	40	40	14009
						0	0	0	449
			10	10		10	10	10	179
						0	0	0	148
			15	15		15	15	15	131
			150	150		150	150	150	1096
			5MIN	5		5	5	5	313
						0	0	0	4268
						0	0	0	669
			25	25		25	25	25	10540
			45 min	45		45	45	45	14300
			15MIN	15		15	15	15	4049
			30MIN	30		30	30	30	5438
			25MIN	25		25	25	25	5105
			120	120		120	120	120	10897
			4 HRS	4	60	240	240	240	968
			5	5		5	5	5	437
			7min	7		7	7	7	265
			6	6		6	6	6	68
			5MIN	5		5	5	5	11034
			1HOUR	1	60	60	60	60	11134
			5	5		5	5	5	10584
			50	50		50	50	50	166
			10 MIN	10		10	10	10	11042
			5MIN	5		5	5	5	11034
			20	20		20	20	20	19
			30	30		30	30	30	51
			10	10		10	10	10	44
			10	10		10	10	10	54
			10	10		10	10	10	55
			5	5		5	5	5	1223
			10min	10		10	10	10	686
			30min	30		30	30	30	688
			20min	20		20	20	20	9093
			10 MIN	10		10	10	10	411
			30 MIN	30		30	30	30	436
			1 hour	1	60	60	60	60	1047
						0	0	0	859
						0	0	0	862
			10	10		10	10	10	61
			10min	10		10	10	10	60
			10	10		10	10	10	80
			10	10		10	10	10	1473
			15	15		15	15	15	1474
			60	60		60	60	60	10746
			8MIN	8		8	8	8	4494
						0	0	0	4268
			15MIN	15		15	15	15	4049
			30MIN	30		30	30	30	5438
			25MIN	25		25	25	25	5105
						0	0	0	107
			40min	40		40	40	40	1361
			1hr	1	60	60	60	60	3029
			25 MIN	25		25	25	25	114
			45 min	45		45	45	45	14300
			5 MIN	5		5	5	5	560
			10	10		10	10	10	37
			5MIN	5		5	5	5	10675
			40MIN	40		40	40	40	11102
			20min	20		20	20	20	62
			10	10		10	10	10	160
			1	1		1	1	1	342
			5	5		5	5	5	351
			20	20		20	20	20	10103
						0	0	0	312
			8MIN	8		8	8	8	4494
			90	90		90	90	90	284
			30	30		30	30	30	359
						0	0	0	357
			6	6		6	6	6	259
			4	4		4	4	4	10922
			10	10		10	10	10	169
						0	0	0	10503
			5	5		5	5	5	57
			30	30		30	30	30	10671
			30	30		30	30	30	10642
			30	30		30	30	30	168
			5MIN	5		5	5	5	11013
			5MIN	5		5	5	5	12080
			1	1		1	1	1	298
			10	10		10	10	10	109
			45	45		45	45	45	29
			10	10		10	10	10	48
			20 MIN	20		20	20	20	982
						0	0	0	86
			60	60		60	60	60	74
			10	10		10	10	10	63
			15	15		15	15	15	10756
			20MIN	20		20	20	20	32
			10	10		10	10	10	99
			1 HR	1	60	60	60	60	167
			20MIN	20		20	20	20	32
			20	20		20	20	20	12
			5MIN	5		5	5	5	663
			15	15		15	15	15	747
			5	5		5	5	5	552
			5MIN	5		5	5	5	12246
			10	10		10	10	10	47
			10	10		10	10	10	744
			10MIN	10		10	10	10	760
			2	2		2	2	2	164
			40	40		40	40	40	561
			10	10		10	10	10	153
			5	5		5	5	5	11144
			10MIN	10		10	10	10	264
			30MIN	30		30	30	30	3122
			5	5		5	5	5	1211
			25 MIN	25		25	25	25	114
			30	30		30	30	30	10765
			30MINS	30		30	30	30	14100
			20	20		20	20	20	10752
			5MIN	5		5	5	5	4020
			15	15		15	15	15	95
			10	10		10	10	10	1458
			25MIN	25		25	25	25	12055
			25MIN	25		25	25	25	12055
			20	20		20	20	20	10885
			4	4		4	4	4	10840
			5	5		5	5	5	10834
			6	6		6	6	6	10831
			3	3		3	3	3	10830
			10	10		10	10	10	10826
			30MIN	30		30	30	30	11047
			10MIN	10		10	10	10	335
			10MIN	10		10	10	10	2206
			1 HOUR	1	60	60	60	60	1430
			30 min	30		30	30	30	18900
			30 min	30		30	30	30	18900
			2m	2		2	2	2	391
			2MIN	2		2	2	2	3312
			15	15		15	15	15	187
			5MIN	5		5	5	5	4034
			1 hour	1	60	60	60	60	19300
			1 hour	1	60	60	60	60	19300
			25	25		25	25	25	309
			5	5		5	5	5	545
			15 MIN	15		15	15	15	1019
			10MIN	10		10	10	10	3001
			1 hrs	1	60	60	60	60	1105
			1 hrs	1	60	60	60	60	46
			60	60		60	60	60	10921
			25	25		25	25	25	21
			7MIN	7		7	7	7	656
			10	10		10	10	10	22
			15	15		15	15	15	261
			5	5		5	5	5	10333
			40 min	40		40	40	40	14800
			30 min	30		30	30	30	15000
			40 min	40		40	40	40	14800
			30 min	30		30	30	30	15000
						0	0	0	203
			70	70		70	70	70	158
						0	0	0	3363
			15	15		15	15	15	466
			3	3		3	3	3	3
			15	15		15	15	15	27
			60	60		60	60	60	20
			5MIN	5		5	5	5	5336
			8MIN	8		8	8	8	4023
			10min	10		10	10	10	5042
			20min	20		20	20	20	5045
			1HRS	1	60	60	60	60	3360
			8MIN	8		8	8	8	660
			30	30		30	30	30	204
						0	0	0	289
			15	15		15	15	15	11652
			15	15		15	15	15	11658
			20	20		20	20	20	11544
			20MIN	20		20	20	20	13634
			15	15		15	15	15	11636
			10	10		10	10	10	11638
			1HRS	1	60	60	60	60	297
			5MIN	5		5	5	5	290
			15MIN	15		15	15	15	536
			15 min	15		15	15	15	19901
			30 min	30		30	30	30	17
			15	15		15	15	15	1087
			5MIN	5		5	5	5	490
			3MIN	3		3	3	3	908
			30	30		30	30	30	589
			40 min	40		40	40	40	13800
						0	0	0	3420
			25	25		25	25	25	10780
			15MIN	15		15	15	15	12207
			15MIN	15		15	15	15	12210
			15	15		15	15	15	11127
			5	5		5	5	5	10997
			1	1		1	1	1	1
			3MIN	3		3	3	3	1460
			10MIN	10		10	10	10	849
			4MIN	4		4	4	4	11046
			5MIN	5		5	5	5	12149
			15MIN	15		15	15	15	12207
			10MIN	10		10	10	10	12247
			15 min	15		15	15	15	19901
			40	40		40	40	40	374
			18	18		18	18	18	451
			5	5		5	5	5	122
			30 min	30		30	30	30	9062
			55 min	55		55	55	55	1001
			30 MIN	30		30	30	30	467
			40 MIN	40		40	40	40	437
						0	0	0	3445
			10min	10		10	10	10	83
			20minu	20		20	20	20	997
			5MIN	5		5	5	5	490
			3MIN	3		3	3	3	908
			3MIN	3		3	3	3	1460
			10MIN	10		10	10	10	849
			5MIN	5		5	5	5	951
						0	0	0	3420
			4min	4		4	4	4	3132
			40 min	40		40	40	40	13800
			10MIN	10		10	10	10	3280
			20MIN	20		20	20	20	10673
			2 hr	2	60	120	120	120	11500
			10MIN	10		10	10	10	3082
			55 min	55		55	55	55	70
			30	30		30	30	30	206
			2 hr	2	60	120	120	120	11500
			4min	4		4	4	4	3132
			4	4		4	4	4	260
			240	240		240	240	240	10379
			60	60		60	60	60	10920
			60	60		60	60	60	10919
			720	720		720	720	720	10918
			60	60		60	60	60	10915
			60	60		60	60	60	10913
			50	50		50	50	50	10882
			30	30		30	30	30	10842
			5	5		5	5	5	425
			5	5		5	5	5	436
			5	5		5	5	5	59
			5	5		5	5	5	64
			5MIN	5		5	5	5	11038
			5MIN	5		5	5	5	951
			30	30		30	30	30	10652
			5MIN	5		5	5	5	11038
			5MIN	5		5	5	5	12235
			40	40		40	40	40	204
			10	10		10	10	10	135
			40 MIN	40		40	40	40	427
			1 HRS	1	60	60	60	60	351
						0	0	0	445
			5MIN	5		5	5	5	12237
			30	30		30	30	30	11370
			240	240		240	240	240	13
			30MIN	30		30	30	30	1269
			20mins	20		20	20	20	1295
			20mins	20		20	20	20	1301
			15	15		15	15	15	11628
			20	20		20	20	20	11630
						0	0	0	109
			50	50		50	50	50	328
			5MIN	5		5	5	5	12179
			1	1		1	1	1	128
			5MIN	5		5	5	5	12179
			15	15		15	15	15	97
			10	10		10	10	10	45
			10MIN	10		10	10	10	762
			30MIN	30		30	30	30	5332
			10MIN	10		10	10	10	3253
			20	20		20	20	20	11273
			10MIN	10		10	10	10	70487
			20	20		20	20	20	568
			130	130		130	130	130	39
			35	35		35	35	35	217
			15	15		15	15	15	111
			4	4		4	4	4	10529
			10MIN	10		10	10	10	70487
			3MIN	3		3	3	3	3349
			5MIN	5		5	5	5	3112
			5minut	5		5	5	5	14002
			30 min	30		30	30	30	18100
			180	180		180	180	180	6
			30 min	30		30	30	30	18100
			15	15		15	15	15	10374
			15	15		15	15	15	10373
			1hr	1	60	60	60	60	14017
			20	20		20	20	20	214
			10	10		10	10	10	444
			1hrs	1	60	60	60	60	1346
			10	10		10	10	10	11534
			10MIN	10		10	10	10	3123
			5	5		5	5	5	73
			240	240		240	240	240	10904
			720	720		720	720	720	10899
			30	30		30	30	30	11265
						0	0	0	11259
			8MIN	8		8	8	8	657
			30min	30		30	30	30	10488
			35 MIN	35		35	35	35	1395
			20	20		20	20	20	14
						0	0	0	204
			40	40		40	40	40	10324
			10	10		10	10	10	10829
			1	1		1	1	1	131
			3MIN	3		3	3	3	3345
			45	45		45	45	45	338
			180	180		180	180	180	486
			30	30		30	30	30	564
			20 MIN	20		20	20	20	990
			65	65		65	65	65	174
						0	0	0	94
			10	10		10	10	10	10569
			1HOUR	1	60	60	60	60	11109
			2	2		2	2	2	11106
			40 MIN	40		40	40	40	1071
			12	12		12	12	12	263
			35	35		35	35	35	92
			1HOUR	1	60	60	60	60	11109
			48 min	48		48	48	48	295
			48 min	48		48	48	48	295
			MIN			0	0	0	5331
			5	5		5	5	5	10600
			45	45		45	45	45	475
			10MIN	10		10	10	10	3377
			42 min	42		42	42	42	287
			42 min	42		42	42	42	287
			5	5		5	5	5	10996
			30	30		30	30	30	10454
			35 MIN	35		35	35	35	1068
			5min	5		5	5	5	10689
			1HOUR	1	60	60	60	60	11093
			40	40		40	40	40	267
			4	4		4	4	4	10926
			4	4		4	4	4	10855
			60	60		60	60	60	10500
			30	30		30	30	30	756
			10MIN	10		10	10	10	4573
			25 min	25		25	25	25	294
			25 min	25		25	25	25	294
			3	3		3	3	3	11272
			4	4		4	4	4	11268
			63	63		63	63	63	266
			10	10		10	10	10	95
			25	25		25	25	25	11266
						0	0	0	324
			30	30		30	30	30	7
			10	10		10	10	10	29
			30	30		30	30	30	18
			5MIN	5		5	5	5	3310
			10MIN	10		10	10	10	662
			5	5		5	5	5	274
			10	10		10	10	10	291
			15	15		15	15	15	11622
			10	10		10	10	10	11631
			15	15		15	15	15	11633
			15MIN	15		15	15	15	11635
						0	0	0	11640
			10	10		10	10	10	11641
			20	20		20	20	20	398
			52min	52		52	52	52	10662
			20MINU	20		20	20	20	10671
			5min	5		5	5	5	10684
			30MIN	30		30	30	30	11115
						0	0	0	11065
			30MIN	30		30	30	30	3121
			5MIN	5		5	5	5	3124
			40 min	40		40	40	40	10700
			40min	40		40	40	40	158
			40min	40		40	40	40	158
			10MIN	10		10	10	10	3086
			40 min	40		40	40	40	15800
			10min	10		10	10	10	66
						0	0	0	11065
			5	5		5	5	5	1062
			10	10		10	10	10	1071
			50MIN	50		50	50	50	3037
			25	25		25	25	25	10544
			40 min	40		40	40	40	10700
			40 min	40		40	40	40	15800
			10MIN	10		10	10	10	60
			60	60		60	60	60	10914
			50	50		50	50	50	10815
			5MIN	5		5	5	5	11034
			5MIN	5		5	5	5	12149
			2MIN	2		2	2	2	12212
			15MIN	15		15	15	15	12232
			10MIN	10		10	10	10	12245
			10MIN	10		10	10	10	12247
						0	0	0	317
			20	20		20	20	20	566
			5	5		5	5	5	269
			10	10		10	10	10	172
			2	2		2	2	2	10502
			45	45		45	45	45	3
			45	45		45	45	45	125
			25	25		25	25	25	136
			35	35		35	35	35	85
			30	30		30	30	30	45
			30	30		30	30	30	528
			5MIN	5		5	5	5	11022
			15MIN	15		15	15	15	94
			1HR	1	60	60	60	60	9854
			10MIN	10		10	10	10	3070
			10MIN	10		10	10	10	3074
			5	5		5	5	5	11406
			5MIN	5		5	5	5	11022
			15MIN	15		15	15	15	12210
			2MIN	2		2	2	2	12212
			15MIN	15		15	15	15	12232
			10MIN	10		10	10	10	12245
			120	120		120	120	120	381
			20	20		20	20	20	446
			15	15		15	15	15	460
			55MIN	55		55	55	55	12014
			10	10		10	10	10	53
			10	10		10	10	10	967
			10	10		10	10	10	1224
			25min	25		25	25	25	683
			10min	10		10	10	10	9090
			10min	10		10	10	10	9096
			20 MIN	20		20	20	20	403
			40 MIN	40		40	40	40	424
			40 MIN	40		40	40	40	425
			40 MIN	40		40	40	40	1008
			20 MIN	20		20	20	20	1011
			30 MIN	30		30	30	30	1060
			27 MIN	27		27	27	27	1062
			20 MIN	20		20	20	20	1066
			45 MIN	45		45	45	45	1074
			1 HOUR	1	60	60	60	60	1075
			25	25		25	25	25	1266
			10	10		10	10	10	78
			10	10		10	10	10	188
			20	20		20	20	20	15744
			40	40		40	40	40	10747
			15	15		15	15	15	10580
			5	5		5	5	5	10305
			30	30		30	30	30	10304
			60	60		60	60	60	10316
			30MIN	30		30	30	30	3037
			15MIN	15		15	15	15	94
			10MIN	10		10	10	10	3074
			10MIN	10		10	10	10	60
			10MIN	10		10	10	10	3086
			1hour	1	60	60	60	60	3126
			1hour	1	60	60	60	60	3127
			240	240		240	240	240	39
			50	50		50	50	50	3614
			15 MIN	15		15	15	15	113
			30 MIN	30		30	30	30	117
			5	5		5	5	5	427
			40MIN	40		40	40	40	11102
			25000	25000		25000	250	250	17500
			10min	10		10	10	10	59
			10 min	10		10	10	10	51
			20	20		20	20	20	98
			30	30		30	30	30	94
			5MIN	5		5	5	5	11013
			20	20		20	20	20	1063
			10 MIN	10		10	10	10	390
			25000	25000		25000	250	250	17500
			30min	30		30	30	30	308
			4	4		4	4	4	261
			3	3		3	3	3	10428
			50	50		50	50	50	10810
						0	0	0	10912
			60	60		60	60	60	10907
			5	5		5	5	5	10856
			4	4		4	4	4	10853
			5	5		5	5	5	10846
			5	5		5	5	5	10844
			5MIN	5		5	5	5	11038
			5MIN	5		5	5	5	11007
			45MIN	45		45	45	45	12176
			5MIN	5		5	5	5	12235
						0	0	0	212
			10	10		10	10	10	214
			10	10		10	10	10	215
			3 HRS	3	60	180	180	180	966
			5MIN	5		5	5	5	12080
			10	10		10	10	10	142
			10	10		10	10	10	143
			10	10		10	10	10	145
			10	10		10	10	10	146
			10	10		10	10	10	168
			10	10		10	10	10	166
			10	10		10	10	10	148
			10	10		10	10	10	147
			25	25		25	25	25	10506
						0	0	0	10508
			10	10		10	10	10	443
						0	0	0	56
			20	20		20	20	20	65
			45	45		45	45	45	23
			45	45		45	45	45	50
			30	30		30	30	30	541
			5MIN	5		5	5	5	11007
			60MIN	60		60	60	60	4523
			1HOUR	1	60	60	60	60	11093
			30	30		30	30	30	10682
			60	60		60	60	60	10455
			5MIN	5		5	5	5	11051
			5MIN	5		5	5	5	11007
			45MIN	45		45	45	45	12176
			120	120		120	120	120	265
			40	40		40	40	40	12011
			30	30		30	30	30	113
			4	4		4	4	4	110
			10	10		10	10	10	71
			10	10		10	10	10	70
			10 min	10		10	10	10	1110
			20	20		20	20	20	1099
			10	10		10	10	10	11431
			5MIN	5		5	5	5	12237
			60MINS	60		60	60	60	1271
			20MINS	20		20	20	20	1272
			25mins	25		25	25	25	1294
			25mins	25		25	25	25	1296
			20mins	20		20	20	20	1299
			10mins	10		10	10	10	1309
			4	4		4	4	4	10331
			20	20		20	20	20	10355
			10	10		10	10	10	87
			10	10		10	10	10	1068
			90	90		90	90	90	1090
			6MIN	6		6	6	6	80
			20	20		20	20	20	591
			20MIN	20		20	20	20	517
			720	720		720	720	720	10434
			5MIN	5		5	5	5	12246
			2	2		2	2	2	130
			10	10		10	10	10	462
			35 MIN	35		35	35	35	430
			10	10		10	10	10	15743
			20MIN	20		20	20	20	517
			1hr	1	60	60	60	60	3033
			10	10		10	10	10	31
			20	20		20	20	20	19
			9MIN	9		9	9	9	5328
			1	1		1	1	1	162
			2	2		2	2	2	163
			3	3		3	3	3	165
			5	5		5	5	5	11660
			20	20		20	20	20	521
			3MIN	3		3	3	3	3079
			15	15		15	15	15	103
			80	80		80	80	80	584
			10	10		10	10	10	11145
			20	20		20	20	20	182
			5	5		5	5	5	10647
			15	15		15	15	15	11481
			10	10		10	10	10	11462
			25IN	25		25	25	25	12036
			10	10		10	10	10	46
			10	10		10	10	10	51
			5	5		5	5	5	10532
			10	10		10	10	10	10534
			40	40		40	40	40	12131
			10	10		10	10	10	76
			3MIN	3		3	3	3	3079
			5MIN	5		5	5	5	4029
			10MIN	10		10	10	10	5350
			30MIN	30		30	30	30	289
			20	20		20	20	20	536
			15	15		15	15	15	10313
			5	5		5	5	5	163
			25	25		25	25	25	15
			2	2		2	2	2	6
			30	30		30	30	30	8
			1	1		1	1	1	9
			25MIN	25		25	25	25	134
			5MIN	5		5	5	5	155
			25 min	25		25	25	25	7
			15 MIN	15		15	15	15	113
			30 MIN	30		30	30	30	117
			25 MIN	25		25	25	25	130
			25MIN	25		25	25	25	134
			5MIN	5		5	5	5	155
			30MIN	30		30	30	30	289
			25 min	25		25	25	25	7
			30 MIN	30		30	30	30	118
			25 MIN	25		25	25	25	130
			2MIN	2		2	2	2	3344
						0	0	0	516
			10MIN	10		10	10	10	109
			10MIN	10		10	10	10	117
			10MIN	10		10	10	10	109
			10MIN	10		10	10	10	117
			50	50		50	50	50	505
			18 min	18		18	18	18	296
			18 min	18		18	18	18	296
			10	10		10	10	10	180
			1 HR	1	60	60	60	60	358
			10MIN	10		10	10	10	3070
			720	720		720	720	720	10900
			60	60		60	60	60	10898
			4	4		4	4	4	11271
			5	5		5	5	5	11270
						0	0	0	11238
			15MIN	15		15	15	15	2152
			15MIN	15		15	15	15	5321
			20	20		20	20	20	11580
			45	45		45	45	45	127
			15	15		15	15	15	484
			45	45		45	45	45	319
			45	45		45	45	45	10318
			30	30		30	30	30	10661
			14	14		14	14	14	320
			15	15		15	15	15	11264
			5	5		5	5	5	11257
			5	5		5	5	5	10627
			10MIN	10		10	10	10	6104
			40	40		40	40	40	563
			30	30		30	30	30	10681
			8	8		8	8	8	11256
			35min	35		35	35	35	14004
			30	30		30	30	30	5
			5MIN	5		5	5	5	4254
			10	10		10	10	10	11644
			20	20		20	20	20	11632
			10	10		10	10	10	292
			20MIN	20		20	20	20	3282
			25min	25		25	25	25	152
			10MIN	10		10	10	10	3093
			10	10		10	10	10	107
			25	25		25	25	25	10728
			15MIN	15		15	15	15	12239
			5	5		5	5	5	11104
			5	5		5	5	5	250
			1	1		1	1	1	82
			3MIN	3		3	3	3	1648
			10MIN	10		10	10	10	7849
			5	5		5	5	5	10563
			15MIN	15		15	15	15	12239
			30	30		30	30	30	375
			10	10		10	10	10	1217
			45 MIN	45		45	45	45	460
						0	0	0	858
			1 HOUR	1	60	60	60	60	874
			28 MIN	28		28	28	28	1072
			40	40		40	40	40	1255
			20	20		20	20	20	1258
			10MIN	10		10	10	10	3093
			3MIN	3		3	3	3	3369
			35	35		35	35	35	3037
			90min	90		90	90	90	3052
			10 MIN	10		10	10	10	119
			10 MIN	10		10	10	10	122
			25min	25		25	25	25	1200
			90	90		90	90	90	579
			10	10		10	10	10	39
			10min	10		10	10	10	10690
			10MIN	10		10	10	10	299
			3MIN	3		3	3	3	3369
			60	60		60	60	60	10916
			60	60		60	60	60	10909
			10	10		10	10	10	70
			2	2		2	2	2	46
			30	30		30	30	30	48
			3	3		3	3	3	496
			30 MIN	30		30	30	30	321
			10	10		10	10	10	73
			4	4		4	4	4	72
			25	25		25	25	25	10694
			10MIN	10		10	10	10	11045
			20MIN	20		20	20	20	1268
			15mins	15		15	15	15	1289
			10mins	10		10	10	10	1302
			20mins	20		20	20	20	1306
			30	30		30	30	30	6
			15MINU	15		15	15	15	10670
			10MIN	10		10	10	10	4218
			20	20		20	20	20	287
			3	3		3	3	3	541
			10	10		10	10	10	52
			30	30		30	30	30	536
			15	15		15	15	15	464
			5	5		5	5	5	193
			4	4		4	4	4	10924
			17	17		17	17	17	257
			5MIN	5		5	5	5	138
			20MIN	20		20	20	20	4153
			15 MIN	15		15	15	15	31
			20 MIN	20		20	20	20	40
			10 MIN	10		10	10	10	119
			20 MIN	20		20	20	20	123
			5MIN	5		5	5	5	138
			20MIN	20		20	20	20	4153
[truncated: 8,293 more rows]
