# Supplementary material for: Willingness to pay for health insurance in the informal sector of Sierra Leone
Source: PLOS journal article supplement (doi:10.1371/journal.pone.0189915), 2018-05-16
Supplement: S17 (10.1371/journal.pone.0189915.s017) [file journal.pone.0189915.s017]

**SURVEY QUESTIONNAIRE**

**Willingness to pay to JOIN & PAY for Social Health Insurance Scheme among  
Households in the Informal Sector in Sierra Leone**

Good morning/afternoon/evening! I have been contracted by the Sierra Leone Social Health Insurance (SLeSHI) Team, who are conducting a study titled; “*Willingness to pay to Join and Pay for Social Health Insurance Scheme among Households in the Informal Sector in Sierra Leone*”, for the purpose of informing policies leading to the establishment of SLeSHI Scheme for ALL Sierra Leoneans. To conduct this study, I would like you to answer some personal questions and your answers will be treated with high confidentiality and participation is voluntary. I would also like to assure you that the information that you will reveal in this interview will be solely for purposes of research, and that your identity will not be made known to any.

I would like to know about your *Health Seeking Behaviour, and your Willingness to Join and Pay for the proposed SLeSHI Scheme*. Do bear in mind that your honest answer to these questions will help us to better understand the situation and will contribute to improve the health status of ALL Sierra Leoneans by identifying the demand and ability to pay for Social Health Insurance (SHI) Scheme.

**A. Household (Socio-demographic) Characteristics**

| No. | Questions                                        | Response Code<br>(check the appropriate option or state nos.)                                                                                                                                        | Skip |
|-----|--------------------------------------------------|------------------------------------------------------------------------------------------------------------------------------------------------------------------------------------------------------|------|
| 100 | Respondent Sex                                   | 1. Male <input type="checkbox"/><br>2. Female <input type="checkbox"/>                                                                                                                               |      |
| 101 | Age of Respondent<br>(Years)                     | 1. 18 - 30 <input type="checkbox"/><br>2. 31 - 45 <input type="checkbox"/><br>3. 46 - 50 <input type="checkbox"/><br>4. 51 - 59 <input type="checkbox"/><br>5. 60 and Above <input type="checkbox"/> |      |
| 102 | Relation of the Respondent to the Household (HH) | 1. Head <input type="checkbox"/><br>2. Spouse <input type="checkbox"/><br>3. Child <input type="checkbox"/><br>4. Others (parent, sibling, in-law, ward, etc): <input type="checkbox"/>              |      |

| No. | Questions                        | Response Code ( <i>check the appropriate option or state nos.</i> )                                                                                                                                                                                                                                                                                              | Skip |
|-----|----------------------------------|------------------------------------------------------------------------------------------------------------------------------------------------------------------------------------------------------------------------------------------------------------------------------------------------------------------------------------------------------------------|------|
| 103 | Respondent Marital Status        | 1. Married ( <i>Monogamous</i> ) <input type="checkbox"/><br>2. Married ( <i>Polygamous</i> ) <input type="checkbox"/><br>3. Divorced <input type="checkbox"/><br>4. Widowed <input type="checkbox"/><br>5. Single <input type="checkbox"/><br>6. Separated <input type="checkbox"/>                                                                             |      |
| 104 | Occupation of the Respondent     | 1. Petty Trading <input type="checkbox"/><br>2. Farming <input type="checkbox"/><br>3. Fishing <input type="checkbox"/><br>4. Tailoring <input type="checkbox"/><br>5. Commercial Bike Riding <input type="checkbox"/><br>6. Commercial Motor Driving <input type="checkbox"/><br>7. Student <input type="checkbox"/><br>8. Other _____ <input type="checkbox"/> |      |
| 105 | Educational Status of Respondent | 1. Primary Education <input type="checkbox"/><br>2. JSS <input type="checkbox"/><br>3. SSS <input type="checkbox"/><br>4. Tertiary <input type="checkbox"/><br>5. Non-formal <input type="checkbox"/><br>6. Never went to school <input type="checkbox"/>                                                                                                        |      |
| 106 | Household Size                   | 1. 0 – 5 yrs: Male_____ Female_____<br>2. 6 – 18 yrs: Male_____ Female_____<br>3. 19 – 59 yrs: Male____ Female_____<br>4. 60+ yrs: Male____ Female_____                                                                                                                                                                                                          |      |

| No. | Questions                                                                                                | Response Code <i>(check the appropriate option or state nos.)</i> | Skip                   |
|-----|----------------------------------------------------------------------------------------------------------|-------------------------------------------------------------------|------------------------|
| 107 | How many Pregnant and Lactating Women are there in the HH?                                               | 1. Pregnant_____<br>2. Lactating_____                             |                        |
| 108 | Has your HH ever made use of the current Free Health Care facility?                                      | 1. Yes <input type="checkbox"/><br>2. No <input type="checkbox"/> | If "No" skip to Part B |
| 109 | Have they ever complained over payment of accessing the Free Health Care facility or buying of medicine? | 1. Yes <input type="checkbox"/><br>2. No <input type="checkbox"/> |                        |

**B. Income and Wealth Index Questions**

| No. | Questions                                                  | Response Code <i>(check the appropriate option or state nos.)</i>                                                                                                                                                                                               | Skip |
|-----|------------------------------------------------------------|-----------------------------------------------------------------------------------------------------------------------------------------------------------------------------------------------------------------------------------------------------------------|------|
| 200 | Approximately how much income does your business give you? | Amount in Le_____                                                                                                                                                                                                                                               |      |
| 201 | How many of these animals do this HH own?                  | 1. Cows <input type="checkbox"/><br>2. Sheep <input type="checkbox"/><br>3. Goat <input type="checkbox"/><br>4. Chickens <input type="checkbox"/><br>5. Beehives <input type="checkbox"/><br>6. Others (specify type and number) _____ <input type="checkbox"/> |      |

|     |                                        |                                                                                                                                                        |  |
|-----|----------------------------------------|--------------------------------------------------------------------------------------------------------------------------------------------------------|--|
| 202 | What kind of latrine does your HH use? | 1. None <input type="checkbox"/><br>2. VIP <input type="checkbox"/><br>3. Traditional Latrine <input type="checkbox"/><br>4. Others ( <i>specify</i> ) |  |
|-----|----------------------------------------|--------------------------------------------------------------------------------------------------------------------------------------------------------|--|

| No. | Questions                                                    | Response Code ( <i>check the appropriate option or state nos.</i> )                                                                                       | Skip |
|-----|--------------------------------------------------------------|-----------------------------------------------------------------------------------------------------------------------------------------------------------|------|
| 203 | Type of roof of Respondent's house                           | 1. Corrugated sheet <input type="checkbox"/><br>2. Thatch <input type="checkbox"/><br>3. Others ( <i>specify</i> )_____                                   |      |
| 204 | How many rooms are used by you and your HH for sleeping only | Number of rooms_____                                                                                                                                      |      |
| 205 | Do you have kitchen?                                         | 1. Yes <input type="checkbox"/><br>2. No <input type="checkbox"/>                                                                                         |      |
| 206 | Do you have separate rooms for cattle and or storage use?    | 1. Yes <input type="checkbox"/><br>2. No <input type="checkbox"/>                                                                                         |      |
| 207 | What is the wall of your house made of?                      | 1. Wooden structure <input type="checkbox"/><br>2. Mud <input type="checkbox"/><br>3. Cement <input type="checkbox"/><br>4. Other ( <i>specify</i> )_____ |      |
| 208 | Do you and your HH have?                                     |                                                                                                                                                           |      |
|     | a. Functioning TV                                            | 1. Yes <input type="checkbox"/> 2. No <input type="checkbox"/>                                                                                            |      |
|     | b. Functioning radio                                         | 1. Yes <input type="checkbox"/> 2. No <input type="checkbox"/>                                                                                            |      |
|     | c. Bed and mattress                                          | 1. Yes <input type="checkbox"/> 2. No <input type="checkbox"/>                                                                                            |      |
|     | 2. Chair and table                                           | 1. Yes <input type="checkbox"/> 2. No <input type="checkbox"/>                                                                                            |      |
|     | 3. Car                                                       | 1. Yes <input type="checkbox"/> 2. No <input type="checkbox"/>                                                                                            |      |
|     | 4. Motor bike (okada)                                        | 1. Yes <input type="checkbox"/> 2. No <input type="checkbox"/>                                                                                            |      |

|  |  |  |  |
|--|--|--|--|
|  |  |  |  |
|--|--|--|--|

**C. Health and Health Related Questions**

| No. | Questions                                                                       | Response Code <i>(check the appropriate option or state nos.)</i>                                                                                                                            | Skip                |
|-----|---------------------------------------------------------------------------------|----------------------------------------------------------------------------------------------------------------------------------------------------------------------------------------------|---------------------|
| 300 | How do you rate the health status of your family?                               | 1. Very Poor <input type="checkbox"/><br>2. Poor <input type="checkbox"/><br>3. Medium <input type="checkbox"/><br>4. Good <input type="checkbox"/><br>5. Very Good <input type="checkbox"/> |                     |
| 301 | Do you or another member of the HH have chronic illness and/or disability?      | 1. Yes <input type="checkbox"/><br>2. No <input type="checkbox"/>                                                                                                                            |                     |
| 302 | Have any member of the family encountered any illness during the past 3 months? | 1. Yes <input type="checkbox"/><br>2. No <input type="checkbox"/>                                                                                                                            | If "No" skip to 304 |
| 303 | How many of the members were ill?                                               | The number of the ill members_____                                                                                                                                                           |                     |
| 304 | Did you seek medical treatment for the recent episode?                          | 1. Yes <input type="checkbox"/><br>2. No <input type="checkbox"/>                                                                                                                            | If "No" skip to 306 |

| No. | Questions                      | Response Code <i>(check the appropriate option or state nos.)</i>                                                                                                                                                                                                                                                                         | Skip                |
|-----|--------------------------------|-------------------------------------------------------------------------------------------------------------------------------------------------------------------------------------------------------------------------------------------------------------------------------------------------------------------------------------------|---------------------|
| 305 | Did you get treatment?         | 1. Yes <input type="checkbox"/><br>2. No <input type="checkbox"/>                                                                                                                                                                                                                                                                         | If "No" skip to 308 |
| 306 | Where did you get treatment?   | 1. Self-treatment <input type="checkbox"/><br>2. Local Drug Vendor <input type="checkbox"/><br>3. Private Health Facility <input type="checkbox"/><br>4. Public Health Center <input type="checkbox"/><br>5. Public Hospital <input type="checkbox"/><br>6. Traditional Healer <input type="checkbox"/><br>7. Other (specify)_____        |                     |
| 307 | Why did you go there?          | 1. The HF was physically accessible <input type="checkbox"/><br>2. The HF was not expensive <input type="checkbox"/><br>3. The HF was not too crowded <input type="checkbox"/><br>4. The health service was courteous <input type="checkbox"/><br>5. The health service was effective <input type="checkbox"/><br>6. Other (specify)_____ |                     |
| 308 | Why did you not get treatment? | 1. Consider the illness is self-limiting<br>2. Not enough money<br>3. Didn't know anywhere to go<br>4. Didn't have time to go to the HF<br>5. Too far to go to HF<br>6. Other (specify)_____           7. Unknown (99)                                                                                                                    |                     |

| No. | Questions                                                                                 | Response Code <i>(check the appropriate option or state nos.)</i>                                                                                                                                                       | Skip                |
|-----|-------------------------------------------------------------------------------------------|-------------------------------------------------------------------------------------------------------------------------------------------------------------------------------------------------------------------------|---------------------|
| 309 | What was the total health care cost of the HH for the treatment during the last 3 months? | Amount in Le_____                                                                                                                                                                                                       |                     |
| 310 | Who covered the health care cost?                                                         | 1. Self <input type="checkbox"/><br>2. Family <input type="checkbox"/><br>3. Government/Free <input type="checkbox"/><br>4. Community <input type="checkbox"/><br>5. Others (specify)_____                              |                     |
| 311 | How satisfied were you with the health care service and cost?                             | 1. Very dissatisfied <input type="checkbox"/><br>2. Dissatisfied <input type="checkbox"/><br>3. Neutral <input type="checkbox"/><br>4. Satisfied <input type="checkbox"/><br>5. Very satisfied <input type="checkbox"/> |                     |
| 312 | How did you perceive quality of the health care service in this area?                     | 1. Very low <input type="checkbox"/><br>2. Low <input type="checkbox"/><br>3. Neutral <input type="checkbox"/><br>4. High <input type="checkbox"/><br>5. Very high <input type="checkbox"/>                             |                     |
| 313 | How did you see finding money to pay for the health care?                                 | 1. Very difficult <input type="checkbox"/><br>2. Difficult <input type="checkbox"/><br>3. Not difficult <input type="checkbox"/>                                                                                        | If "No" skip to 315 |

| No. | Questions                                                                                            | Response Code <i>(check the appropriate option or state nos.)</i>                                                                                                                                                                                                                                                                                                                      | Skip                |
|-----|------------------------------------------------------------------------------------------------------|----------------------------------------------------------------------------------------------------------------------------------------------------------------------------------------------------------------------------------------------------------------------------------------------------------------------------------------------------------------------------------------|---------------------|
| 314 | If paying for medical expenses was difficult, how did you get it?                                    | 1. Drew from savings <input type="checkbox"/><br>2. Borrowing from someone <input type="checkbox"/><br>3. Assisted by relatives <input type="checkbox"/><br>4. Did extra work <input type="checkbox"/><br>5. Sell capital assets such as cows <input type="checkbox"/><br>6. Cut back on other things, food, drinks, clothes, etc <input type="checkbox"/><br>7. Others (specify)_____ |                     |
| 315 | Did you borrow any money from relatives or other people to cover medical costs within the last year? | 1. Yes <input type="checkbox"/><br>2. No <input type="checkbox"/>                                                                                                                                                                                                                                                                                                                      | If "No" skip to 317 |
| 316 | How much did you borrow?                                                                             | Amount in Le_____                                                                                                                                                                                                                                                                                                                                                                      |                     |
| 317 | What is the nearest conventional health institution to your home?                                    | 1. Health center <input type="checkbox"/><br>2. Clinic (private) <input type="checkbox"/><br>3. Hospital (public) <input type="checkbox"/>                                                                                                                                                                                                                                             |                     |
| 318 | How long does it take to reach the nearby HF from your home?                                         | Time in minutes_____                                                                                                                                                                                                                                                                                                                                                                   |                     |
| 319 | What form of transportation did you use to reach the location where you obtained treatment?          | 1. Personal Vehicle <input type="checkbox"/><br>2. Public Transport <input type="checkbox"/><br>3. Ambulance <input type="checkbox"/><br>4. Motor Bike (Okada) <input type="checkbox"/><br>5. Bicycle <input type="checkbox"/><br>6. Others (specify)_____                                                                                                                             |                     |

PLEASE EXPLAIN THE SOCIAL HEALTH INSURANCE SCHEME SCENARIO TO THE RESPONDENT BEFORE YOU ADMINISTER QUESTIONS IN SECTIONS C & D.

**D. Willingness to Join the SLeSHI Scheme**

| No. | Questions                                                                         | Response Code <i>(check the appropriate option or state nos.)</i>                                                                                                                                                                                                                                                                                                                                                                                                                                                                                                                              | Skip                    |
|-----|-----------------------------------------------------------------------------------|------------------------------------------------------------------------------------------------------------------------------------------------------------------------------------------------------------------------------------------------------------------------------------------------------------------------------------------------------------------------------------------------------------------------------------------------------------------------------------------------------------------------------------------------------------------------------------------------|-------------------------|
| 400 | Based on the scenario above, will you be willing to join SLeSHI when established? | 1. Yes <input type="checkbox"/><br>2. No <input type="checkbox"/>                                                                                                                                                                                                                                                                                                                                                                                                                                                                                                                              | If "No" skip to 402     |
| 401 | If "Yes", why will you join?                                                      | 1. It provides free access to medical care <input type="checkbox"/><br>2. To help others <input type="checkbox"/><br>3. For security and peace of mind in times of ill-health <input type="checkbox"/><br>4. Facing health problems frequently <input type="checkbox"/><br>5. Others (specify)_____                                                                                                                                                                                                                                                                                            |                         |
| 402 | Why will you not join the Scheme?                                                 | 1. I do not have enough money to pay <input type="checkbox"/><br>2. Do not need health insurance <input type="checkbox"/><br>3. OOP charge is better <input type="checkbox"/><br>4. Lack of trust in government programmes <input type="checkbox"/><br>5. Lack of functional HF in our area <input type="checkbox"/><br>6. No qualified medical personnel in the HF <input type="checkbox"/><br>7. Contributing money for sickness in advance is a taboo <input type="checkbox"/><br>8. Scope of illness covered by the Scheme is limited <input type="checkbox"/><br>9. Others (specify)_____ | Stop the interview here |

**E. Willingness to Pay for the SLeSHI Scheme**

| No. | Questions                                                                                                           | Response Code <i>(check the appropriate option or state nos.)</i>                                                                                                                                                                                                                                                          | Skip                                       |
|-----|---------------------------------------------------------------------------------------------------------------------|----------------------------------------------------------------------------------------------------------------------------------------------------------------------------------------------------------------------------------------------------------------------------------------------------------------------------|--------------------------------------------|
| 500 | Now that you have agreed to join the SLeSHI Scheme, how frequently would you prefer to pay?                         | 1. Monthly <input type="checkbox"/><br>2. Quarterly <input type="checkbox"/><br>3. Half-yearly <input type="checkbox"/><br>4. Yearly <input type="checkbox"/><br>5. Others (specify)_____                                                                                                                                  |                                            |
| 501 | Assuming you were to pay Le 20,000 per month per head as premium for the SLeSHI Scheme, will you be willing to pay? | 1. Yes <input type="checkbox"/><br>2. No <input type="checkbox"/><br>3. Don't know <input type="checkbox"/>                                                                                                                                                                                                                | If either "No" or "Don't know" skip to 503 |
| 502 | If the premium is set at Le 30,000 per month per head for the SLeSHI Scheme, would you be willing to pay?           | 1. Yes <input type="checkbox"/><br>2. No <input type="checkbox"/><br>3. Don't know <input type="checkbox"/>                                                                                                                                                                                                                | If either "No" or "Don't know" skip to 504 |
| 503 | If the premium is set at Le 10,000 per month per head for the SLeSHI Scheme, would you be willing to pay?           | 1. Yes <input type="checkbox"/><br>2. No <input type="checkbox"/><br>3. Don't know <input type="checkbox"/>                                                                                                                                                                                                                |                                            |
| 504 | What is the Maximum Amount will you be willing to pay per head based on your choice mode of payment?                | Amount in Le_____                                                                                                                                                                                                                                                                                                          |                                            |
| 505 | If the answer is Le 0.00 in 401, then tell us why is you and your household not willing to pay for the Scheme?      | 1. I doubt whether it will be managed properly <input type="checkbox"/><br>2. It should be the responsibility of the government <input type="checkbox"/><br>3. Because of lack of money <input type="checkbox"/><br>4. The wealthy people should pay for the programme <input type="checkbox"/><br>5. Other (specify)_____ |                                            |
